# Supplementary material for: Identifying the preferential pathways of CO2 capture and hydrogenation to methanol over an Mn(i)–PNP catalyst: a computational study
Source: Royal Society of Chemistry journal article supplement (doi:10.1039/d1dt01208h), 2021-01-01
Supplement: d1dt01208h1.pdf [file d1dt01208h1.pdf]

## Supporting Information

### Identifying the preferential pathways of CO<sub>2</sub> capture and hydrogenation to methanol over Mn(I)-PNP catalyst: A computational study

Shyama Charan Mandal,<sup>†</sup> Biswarup Pathak,<sup>†,\*</sup>

<sup>†</sup>Department of Chemistry, Indian Institute of Technology Indore, Indore 453552, India

\*Email: [biswarup@iiti.ac.in](mailto:biswarup@iiti.ac.in)

#### Contents

1. Gaussian full references
2. Optimization of basis sets and solvent model
3. Table of reaction free energies using different basis sets and solvation model for Mn(I)-PNP based catalyst
4. Possible reaction mechanism and corresponding reaction free energy profile diagram of CO<sub>2</sub> capturing to oxazolidinone with frontier molecular orbitals of intermediates 4 and 5
5. Proposed mechanistic pathway of Pathway I for C–N bond cleavage of oxazolidinone by Mn(I)-PNP catalyst
6. Proposed mechanistic pathway of Pathway II for C–O bond cleavage of oxazolidinone by Mn(I)-PNP catalyst
7. Proposed mechanistic pathway of Pathway III for C=O bond hydrogenation of oxazolidinone by Mn(I)-PNP catalyst
8. Table of singlet and triplet state free energy of Mn(I) based intermediates of Pathway I
9. Reaction scheme for Pathway C and D in the presence of Mn(I)-PNP catalyst

10. Reaction free energy profile diagram for Pathway C and D in the presence of Mn(I)-PNP catalyst
11. Reaction scheme for Pathway E and F in the presence of Mn(I)-PNP catalyst
12. Reaction free energy profile diagram for Pathway E and F in the presence of Mn(I)-PNP catalyst
13. Scheme and reaction free energy profile diagram for 2-((hydroxymethyl)amino)propan-1-ol (**36**) hydrogenation to methanol
14. Overall mechanistic pathway for oxazolidinone hydrogenation to methanol via C–N bond hydrogenation followed by C–O/C=O and C=O/C–O using Mn(I)-PNP catalyst
15. Overall mechanistic pathway for oxazolidinone hydrogenation to methanol via C=O bond hydrogenation followed by C–N/C–O and C–O/C–N using Mn(I)-PNP catalyst
16. Cartesian coordinates and energies (in Hartree) in solvent phase for all the species
17. References

### **1. Gaussian full references**

Gaussian 09, Revision D.01, M. J. Frisch, G. W. Trucks, H. B. Schlegel, G. E. Scuseria, M. A. Robb, J. R. Cheeseman, G. Scalmani, V. Barone, B. Mennucci, G. A. Petersson, H. Nakatsuji, M. Caricato, X. Li, H. P. Hratchian, A. F. Izmaylov, J. Bloino, G. Zheng, J. L. Sonnenberg, M. Hada, M. Ehara, K. Toyota, R. Fukuda, J. Hasegawa, M. Ishida, T. Nakajima, Y. Honda, O. Kitao, H. Nakai, T. Vreven, J. A. Montgomery, Jr., J. E. Peralta, F. Ogliaro, M. Bearpark, J. J. Heyd, E. Brothers, K. N. Kudin, V. N. Staroverov, T. Keith, R. Kobayashi, J. Normand, K. Raghavachari, A. Rendell, J. C. Burant, S. S. Iyengar, J. Tomasi, M. Cossi, N. Rega, J. M. Millam, M. Klene, J. E. Knox, J. B. Cross, V. Bakken, C. Adamo, J. Jaramillo, R. Gomperts, R. E. Stratmann, O. Yazyev, A. J. Austin, R. Cammi, C. Pomelli, J. W. Ochterski, R. L. Martin, K. Morokuma, V. G.

Zakrzewski, G. A. Voth, P. Salvador, J. J. Dannenberg, S. Dapprich, A. D. Daniels, O. Farkas, J. B. Foresman, J. V. Ortiz, J. Cioslowski, and D. J. Fox, Gaussian, Inc., Wallingford CT, 2013.

## 2. Optimization of basis sets and solvent model

**Text S1:** In this study, our considered catalyst is Mn(I)-PNP for the oxazolidinone hydrogenation to methanol. In this context, Beller and coworkers have made a significant contribution and reported the reversibility of the catalyst when H<sub>2</sub> is attached with the Mn(I)-PNP based catalyst.<sup>1</sup> Therefore, for the selection of our basis sets and solvent model we have considered the reversible step and calculated the reaction free energies using two different set of basis sets and solvent models. The 6-31++G(d,p), 6-311++G(d,p) basis sets for non-metals and LANL2DZ-ECP and SDD for Mn atom have been considered.<sup>2-6</sup> In case of solvent models, we have considered conductor-like polarizable continuum (CPCM) and solvation model based on density (SMD).<sup>7-9</sup> In our calculations we have also used Grimme's DFT-D3 corrections.<sup>10-15</sup> Further to this, we have calculated all the possible combinations and calculated the reaction free energies of the active catalyst formation for Mn(I)-PNP based catalyst in the presence of H<sub>2</sub>. using different functionals, basis sets and solvent models (Table S1). Our calculated reaction free energies suggest that the step is quite agreement with the reversibility nature of the reaction whether we consider B3LYP or B3LYP + D3 functional along with other combinations as show in the Table S1. So, we would expect B3LYP-D3 functional 6-31++G(d,p) basis set for nonmetals and LANL2DZ-ECP for Mn atom with CPCM solvent model for THF solvent is acceptable for the mechanistic investigation of CO<sub>2</sub> hydrogenation to methanol.

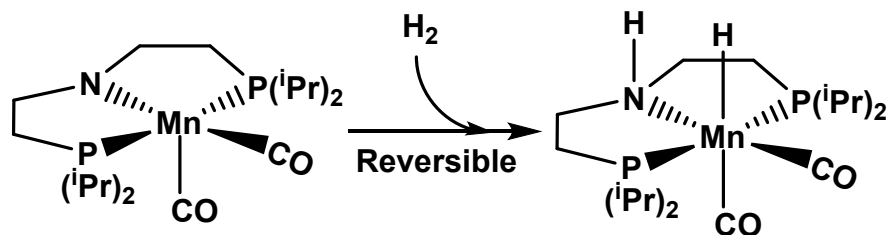

### 3. Table of reaction free energies using different basis sets and solvation model for Mn(I)-PNP based catalyst

**Table S1:** Evaluation of functional, basis sets and solvation model for Mn(I)-PNP based catalyst.

| Functional | Basis set for nonmetals | Basis set for Mn atom | Solvent model for THF | Reaction free energy (kcal/mol) |
|------------|-------------------------|-----------------------|-----------------------|---------------------------------|
| B3LYP+D3   | 6-31++G(d,p)            | LANL2DZ               | CPCM                  | -1.1                            |
| B3LYP+D3   | 6-31++G(d,p)            | LANL2DZ               | SMD                   | -9.7                            |
| B3LYP+D3   | 6-311++G(d,p)           | LANL2DZ               | CPCM                  | -1.4                            |
| B3LYP+D3   | 6-311++G(d,p)           | LANL2DZ               | SMD                   | -9.4                            |
| B3LYP+D3   | 6-31++G(d,p)            | SDD                   | CPCM                  | -0.8                            |
| B3LYP+D3   | 6-31++G(d,p)            | SDD                   | SMD                   | -9.2                            |
| B3LYP+D3   | 6-311++G(d,p)           | SDD                   | CPCM                  | -0.7                            |
| B3LYP+D3   | 6-311++G(d,p)           | SDD                   | SMD                   | -8.8                            |
| B3LYP      | 6-31++G(d,p)            | LANL2DZ               | CPCM                  | 1.2                             |

4. Possible reaction mechanism and corresponding reaction free energy profile diagram of CO<sub>2</sub> capturing to oxazolidinone with frontier molecular orbitals of intermediates 4 and 5

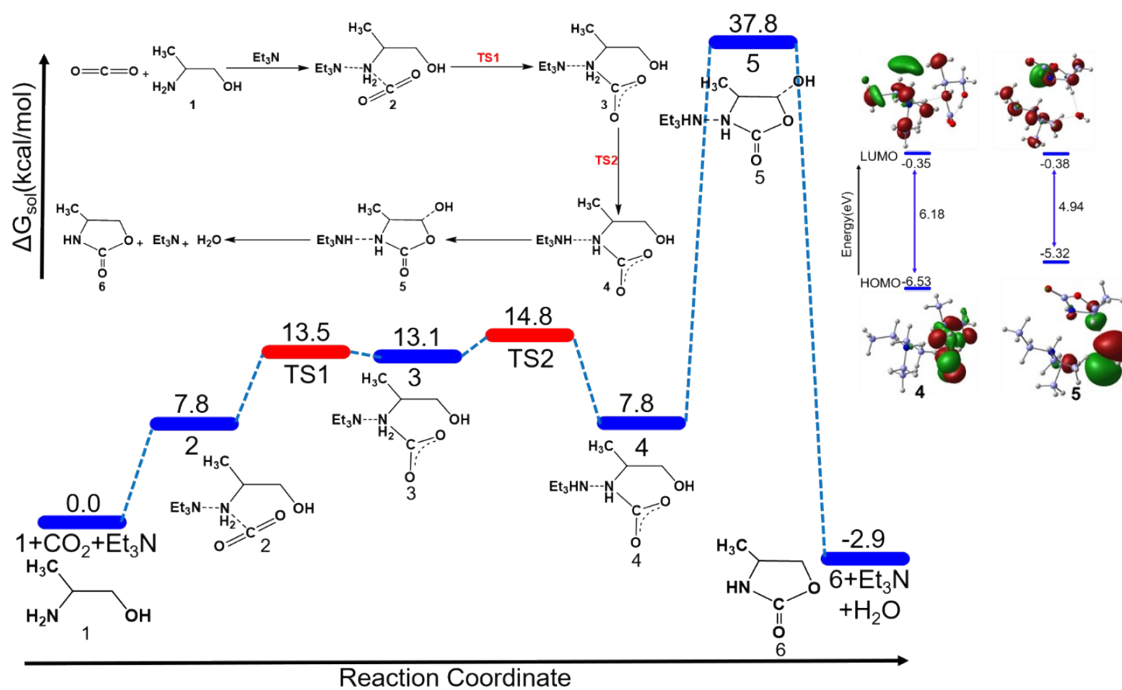

**Figure S1:** Possible reaction mechanism and corresponding reaction free energy profile diagram of CO<sub>2</sub> capturing to oxazolidinone using 2-amino-1-propanol amino alcohol in the presence of Et<sub>3</sub>N base and frontier molecular orbitals of intermediates 4 and 5.

5. Proposed mechanistic pathway of Pathway I for C–N bond cleavage of oxazolidinone by Mn(I)-PNP catalyst

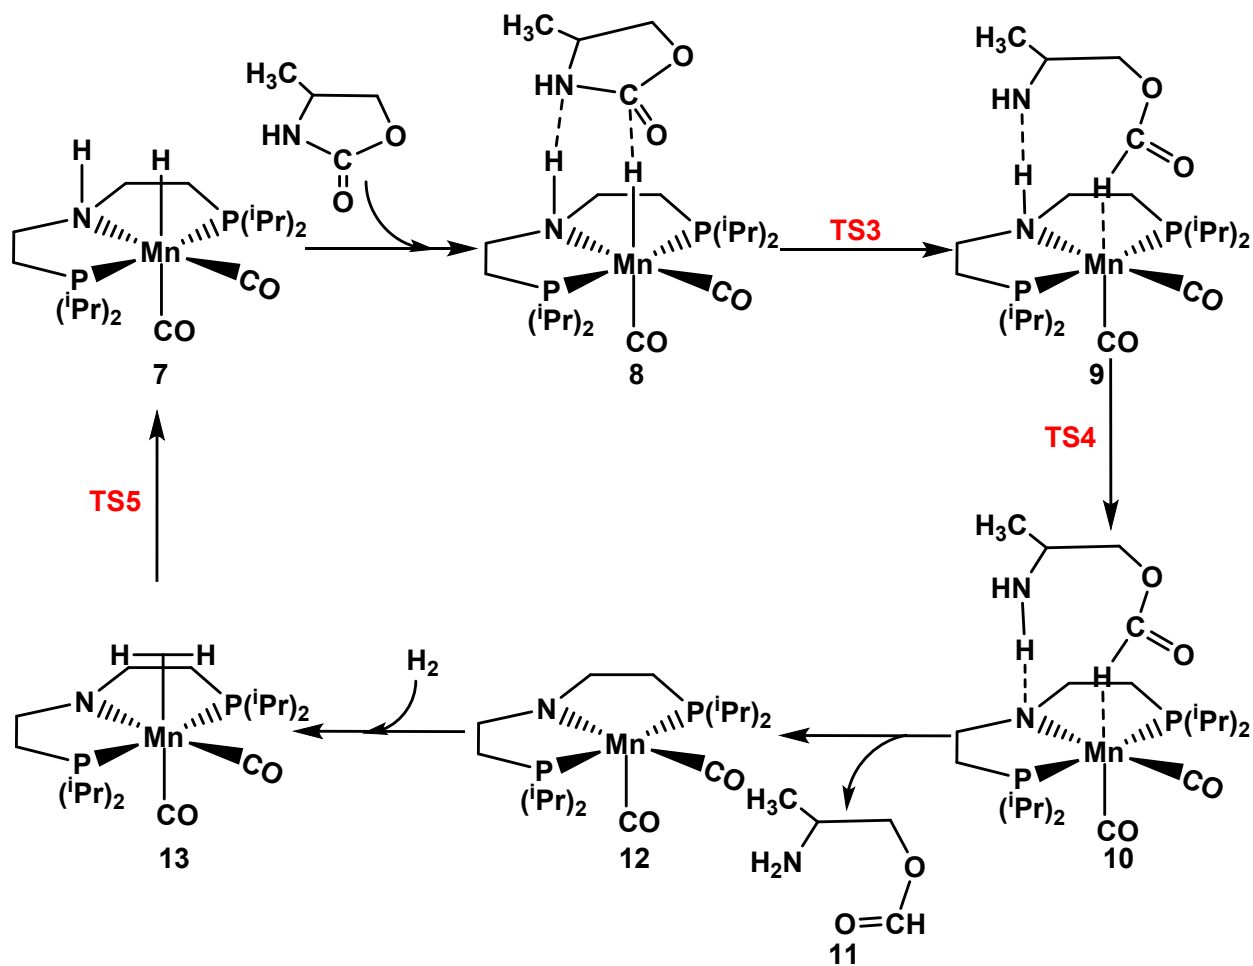

**Scheme S1:** Proposed mechanistic pathway of Pathway I for C–N bond cleavage of oxazolidinone by Mn(I)-PNP catalyst.

6. Proposed mechanistic pathway of Pathway II for C–O bond cleavage of oxazolidinone by Mn(I)-PNP catalyst

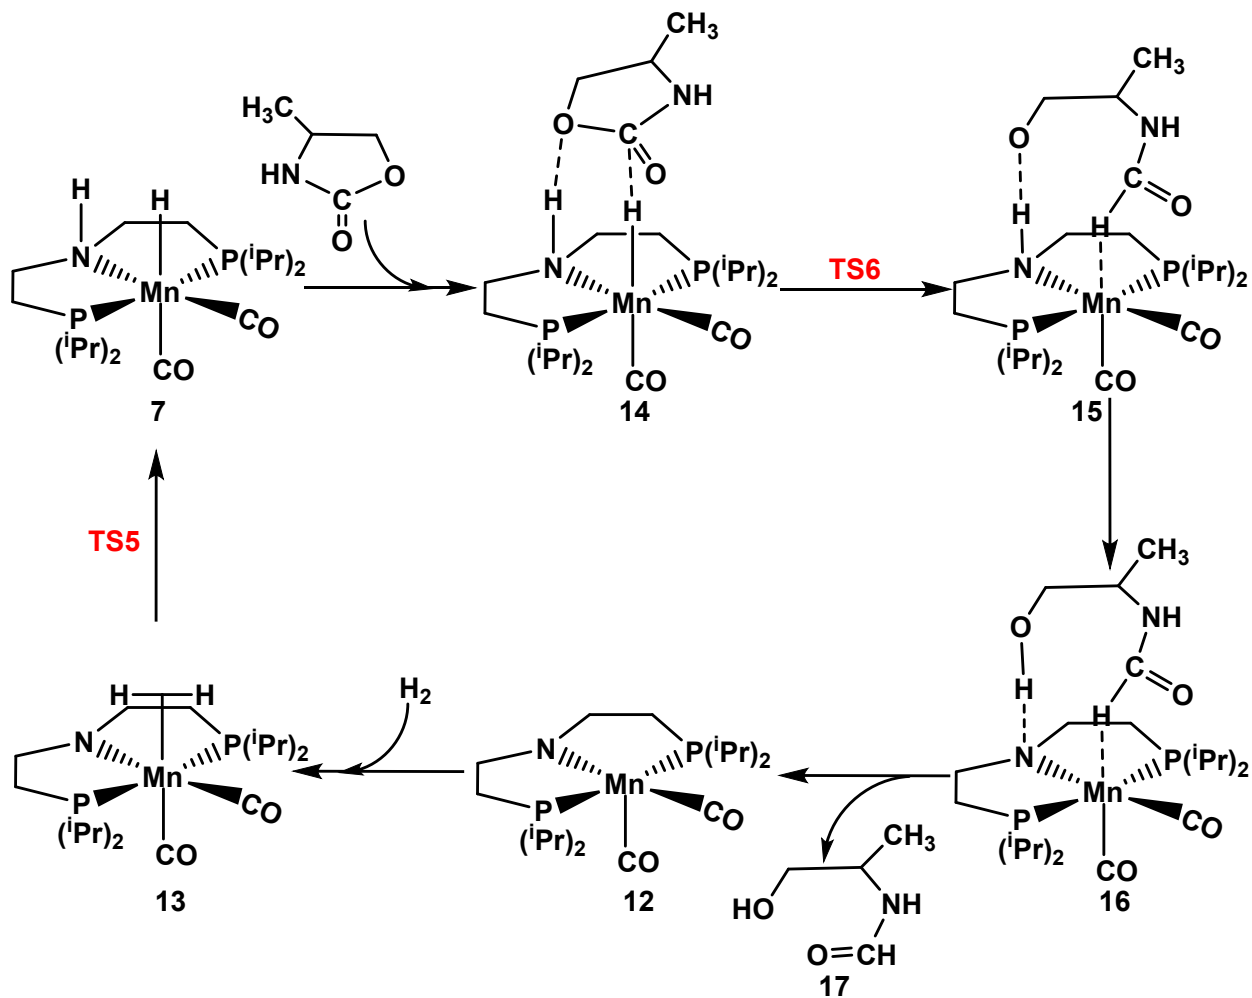

**Scheme S2:** Proposed mechanistic pathway of Pathway II for C–O bond cleavage of oxazolidinone by Mn(I)-PNP catalyst.

7. Proposed mechanistic pathway of Pathway III for C=O bond hydrogenation of oxazolidinone by Mn(I)-PNP catalyst

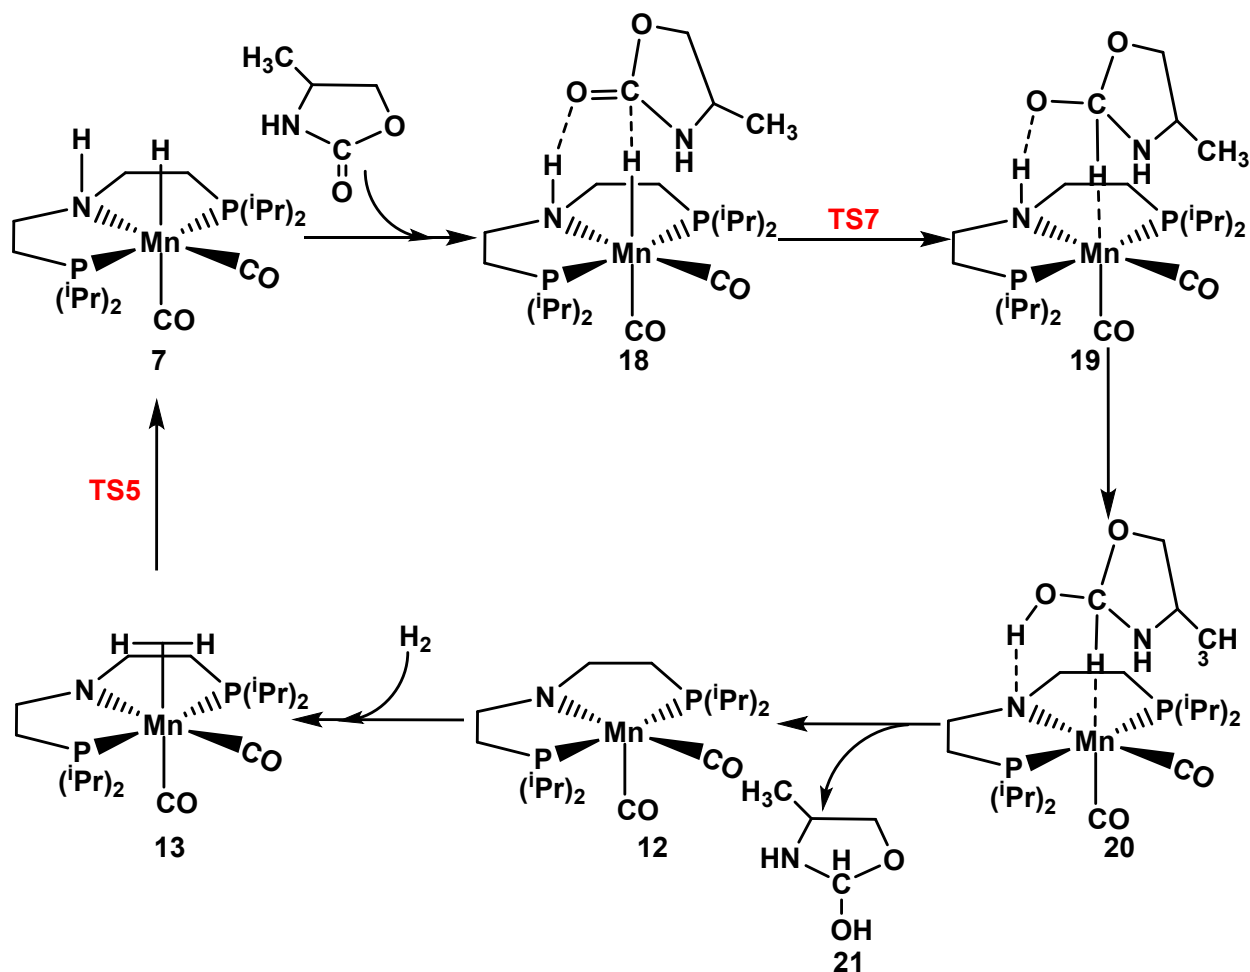

**Scheme S3:** Proposed mechanistic pathway of Pathway III for C=O bond hydrogenation of oxazolidinone by Mn(I)-PNP catalyst.



**8. The total energies of the singlet and triplet states of Mn(I) based intermediates associated in Pathway I**

**Table S2:** The total energies (in Hartree) of the singlet and triplet states of Mn(I) based intermediates associated in Pathway I and the energy difference (kcal/mol) between the singlet and triplet states of the Mn(I) based intermediates.

| Intermediates | Singlet      | Triplet      | Energy difference<br>(kcal/mol) |
|---------------|--------------|--------------|---------------------------------|
| <b>7</b>      | -1700.378366 | -1700.338063 | 25.3                            |
| <b>8</b>      | -2062.186089 | -2062.144316 | 26.2                            |
| <b>9</b>      | -2062.154250 | -2062.140130 | 8.9                             |
| <b>10</b>     | -2062.171121 | -2062.137400 | 21.2                            |
| <b>12</b>     | -1699.196572 | -1699.161504 | 22.0                            |

## 9. Reaction scheme for Pathway C and D in the presence of Mn(I)-PNP catalyst

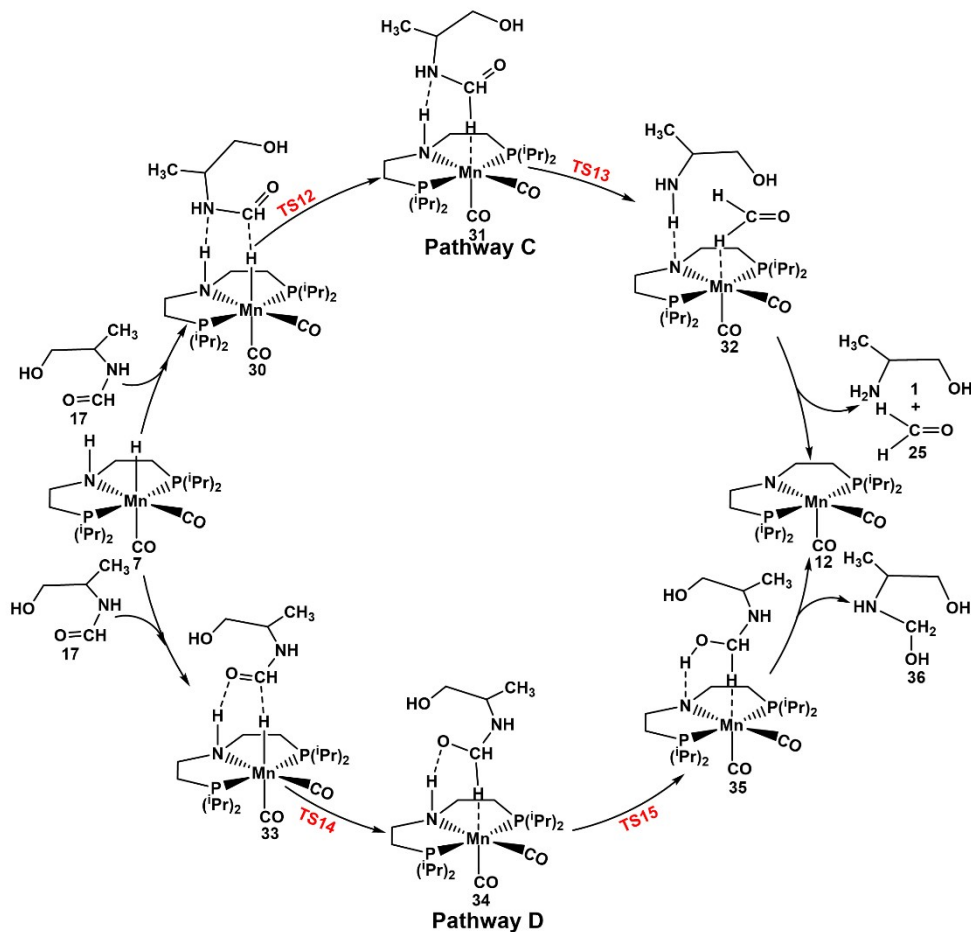

**Scheme S4:** The reaction mechanisms of C-N bond cleavage (Pathway C) and C=O bond hydrogenation (Pathway D) of (1-hydroxypropan-2-yl)formamide (**17**) to formaldehyde (**25**) and 2-((hydroxymethyl)amino)propan-1-ol (**36**) in the presence of Mn(I)-PNP catalyst.

**10. Reaction free energy profile diagram for Pathway C and D in the presence of Mn(I)-PNP catalyst**

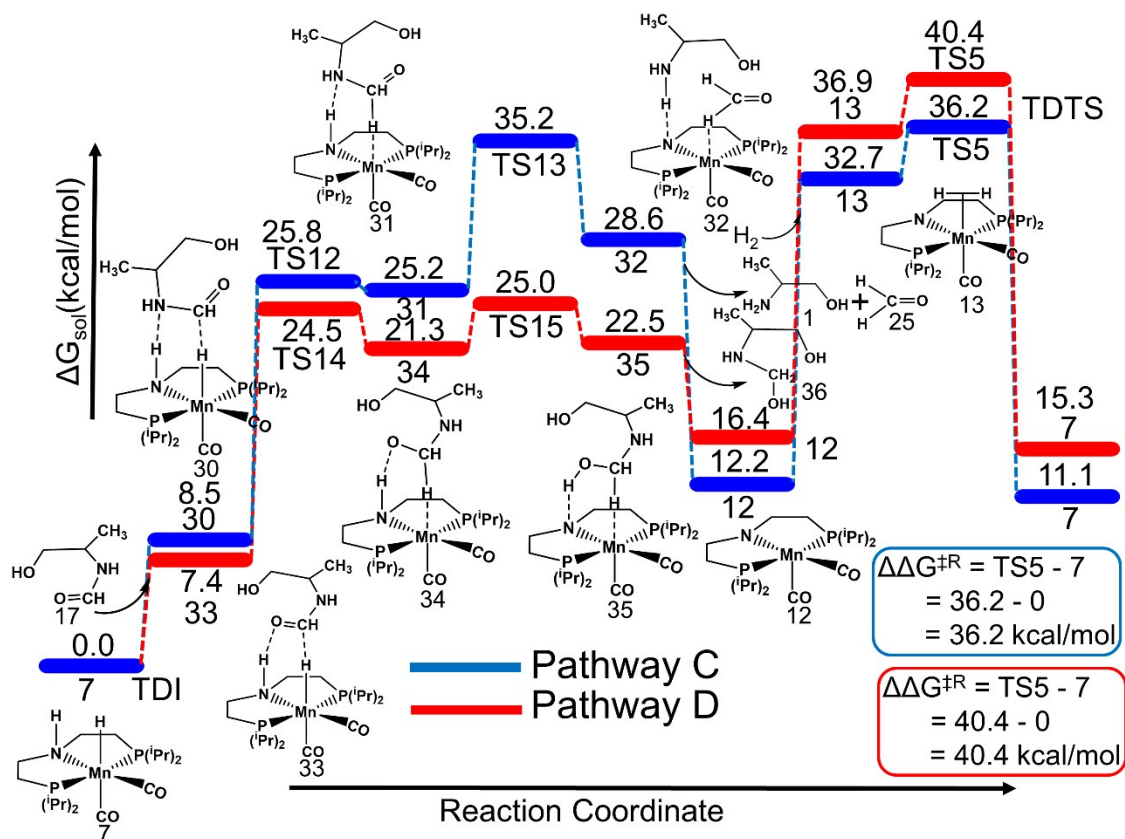

**Figure S2:** Reaction free energy profile diagram for C–N bond cleavage (Pathway C) and C=O bond hydrogenation (Pathway D) of (1-hydroxypropan-2-yl)formamide (**17**) to formaldehyde (**25**) and 2-((hydroxymethyl)amino)propan-1-ol (**36**) using the Mn(I)-PNP catalyst. Here,  $\Delta\Delta G^{\ddagger R}$  denotes the total free energy barrier of the catalytic cycle.

## 11. Reaction scheme for Pathway E and F in the presence of Mn(I)-PNP catalyst

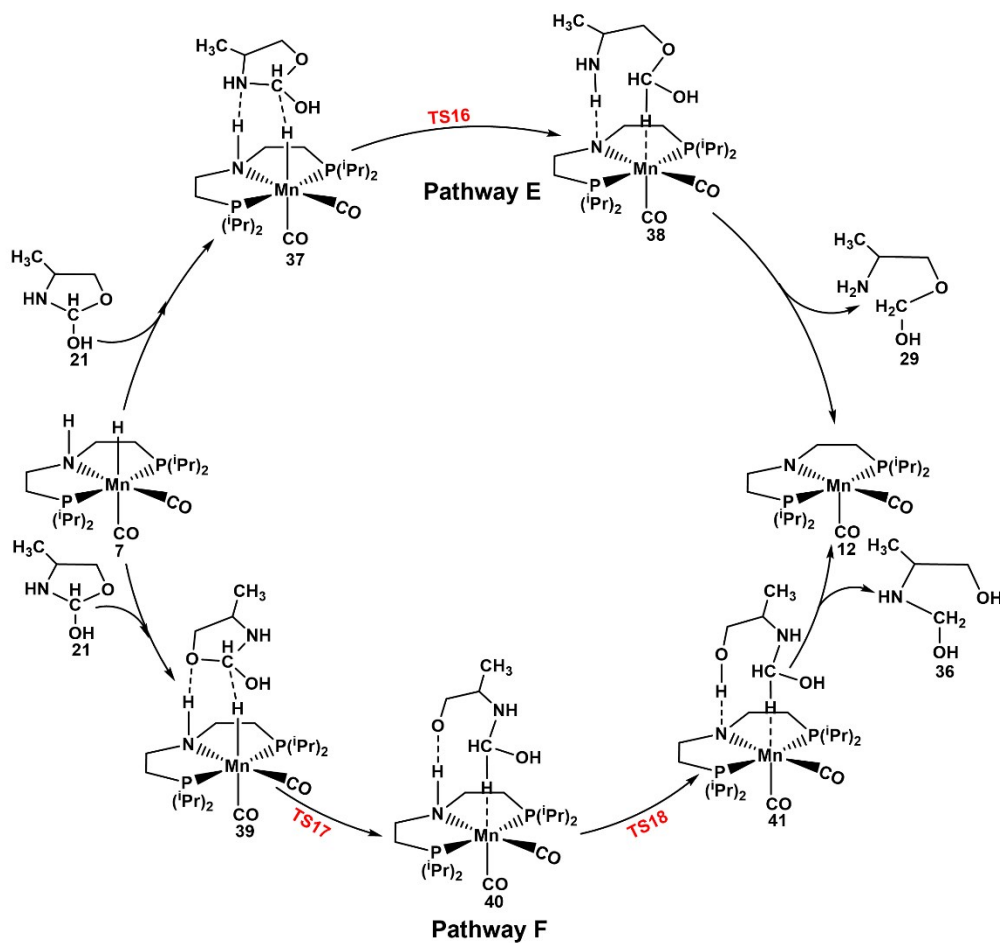

**Scheme S5:** Reaction scheme for C–N bond cleavage (Pathway E) and C–O bond hydrogenation (Pathway F) of 4-methyloxazolidin-2-ol (**21**) to (2-aminopropoxy)methanol (**29**) and 2-((hydroxymethyl)amino)propan-1-ol (**36**) in the presence of Mn(I)-PNP catalyst.

12. Reaction free energy profile diagram for Pathway E and F in the presence of Mn(I)-PNP catalyst

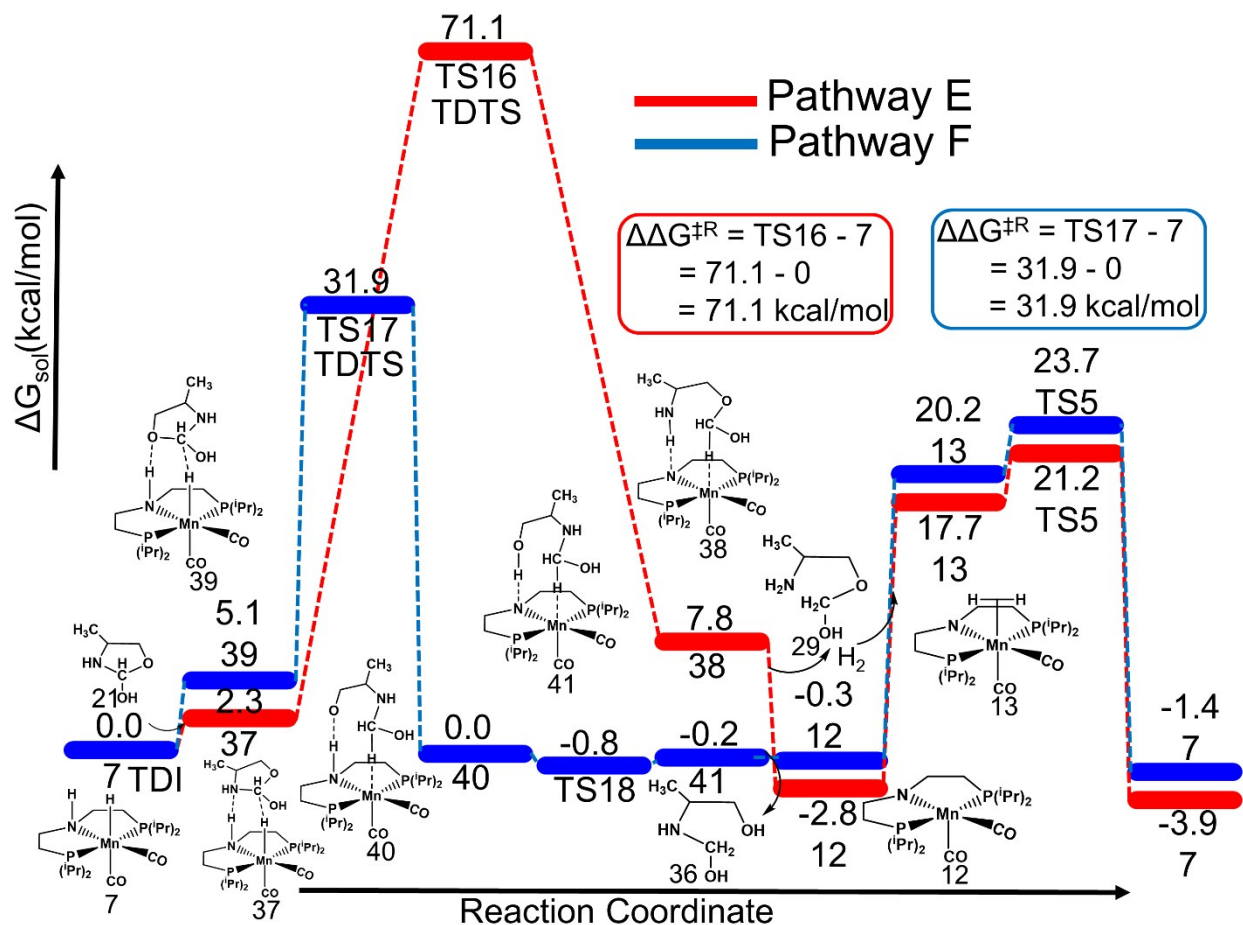

**Figure S3:** Reaction scheme and corresponding reaction free energy profile diagram for C–N bond cleavage (Pathway E) and C–O bond hydrogenation (Pathway F) of 4-methyloxazolidin-2-ol (**21**) to (2-aminopropoxy)methanol (**29**) and 2-((hydroxymethyl)amino)propan-1-ol (**36**) using the Mn(I)-PNP catalyst. Here,  $\Delta\Delta G^{\ddagger R}$  denotes the total free energy barrier of the catalytic cycle.

13. Scheme and reaction free energy profile diagram for 2-  
 ((hydroxymethyl)amino)propan-1-ol (36) hydrogenation to methanol

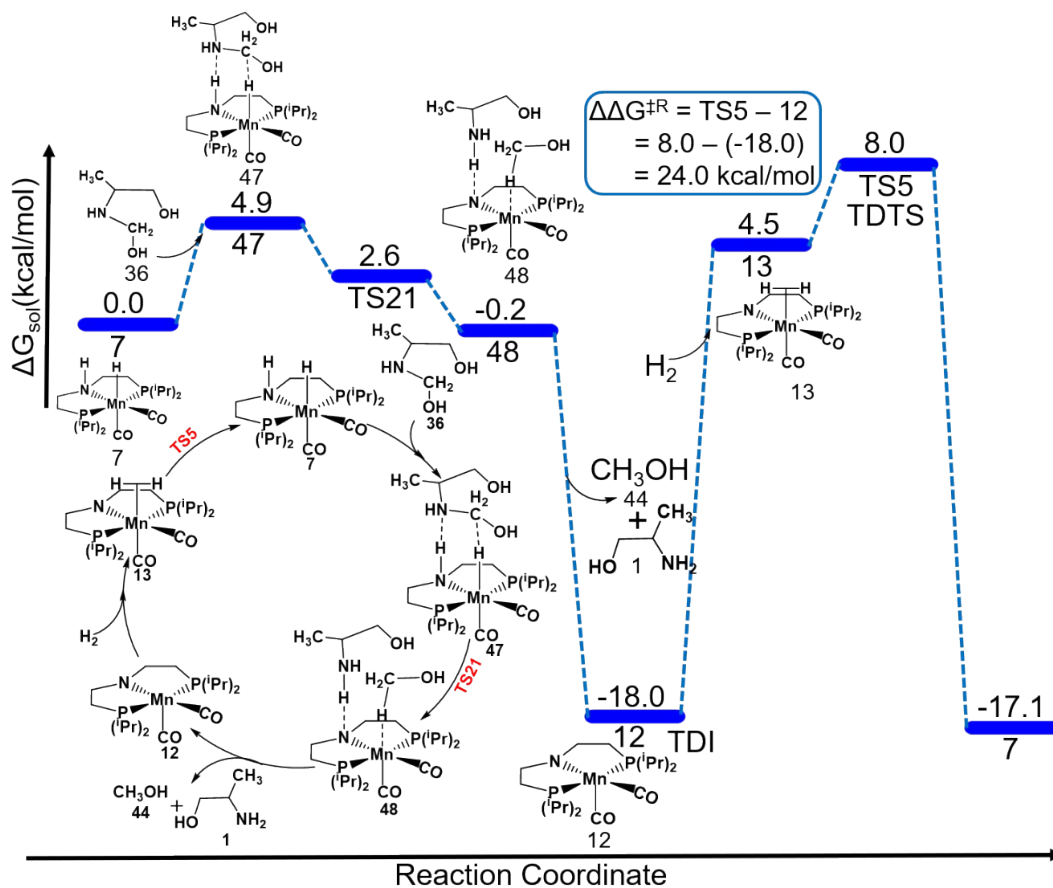

**Figure S4:** Reaction schemes and corresponding reaction free energy profile diagrams of 2-((hydroxymethyl)amino)propan-1-ol (36) hydrogenation to methanol using the Mn(I)-PNP catalyst. Here,  $\Delta\Delta G^{\ddagger R}$  denotes the total free energy barrier of the catalytic cycle.

14. Overall mechanistic pathway for oxazolidinone hydrogenation to methanol via C–N bond hydrogenation followed by C–O/C=O and C=O/C–O using Mn(I)-PNP catalyst

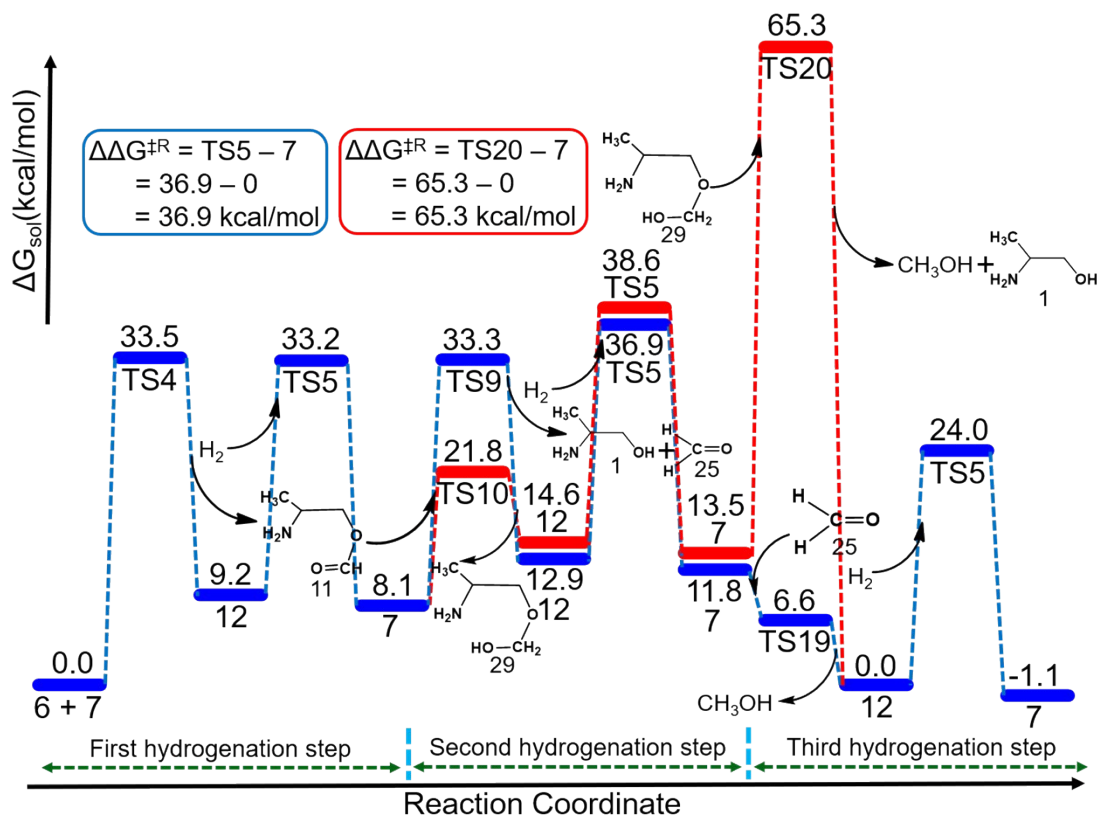

**Figure S5:** Overall reaction free energy profile diagram for oxazolidinone hydrogenation to methanol via C–N bond hydrogenation followed by C–O/C=O and C=O/C–O using Mn(I)-PNP catalyst. Here,  $\Delta\Delta G^{\ddagger R}$  denotes the total free energy barrier of the catalytic cycle.

15. Overall mechanistic pathway for oxazolidinone hydrogenation to methanol via C=O bond hydrogenation followed by C–N/C–O and C–O/C–N using Mn(I)-PNP catalyst

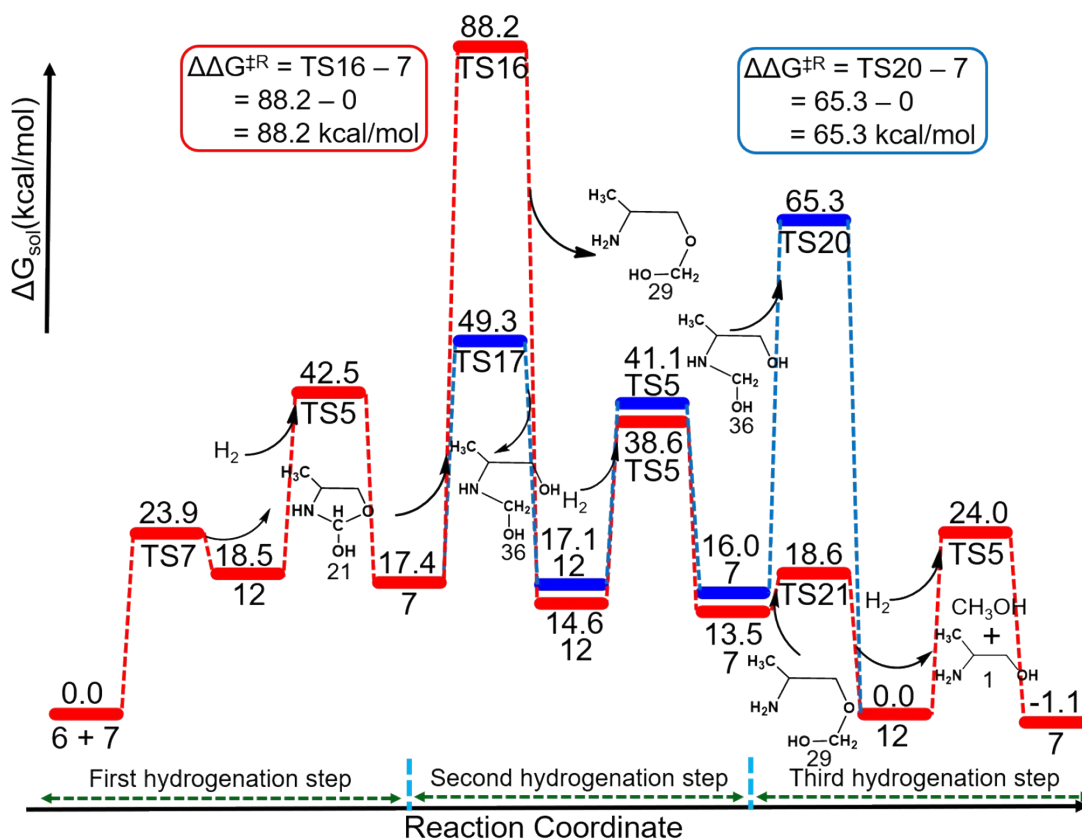

**Figure S6:** Overall reaction free energy profile diagram for oxazolidinone hydrogenation to methanol via C=O bond hydrogenation followed by C–N/C–O and C–O/C–N using Mn(I)-PNP catalyst. Here,  $\Delta\Delta G^{\ddagger R}$  denotes the total free energy barrier of the catalytic cycle.



## 16. Cartesian coordinates and energies (in Hartree) in solvent phase for all the species

### H<sub>2</sub>

|   |             |             |              |
|---|-------------|-------------|--------------|
| 1 | 0.000000000 | 0.000000000 | 0.372005000  |
| 1 | 0.000000000 | 0.000000000 | -0.372005000 |

-1.180464

### CO<sub>2</sub>

|   |             |             |              |
|---|-------------|-------------|--------------|
| 6 | 0.000000000 | 0.000000000 | 0.000000000  |
| 8 | 0.000000000 | 0.000000000 | 1.169170000  |
| 8 | 0.000000000 | 0.000000000 | -1.169170000 |

-188.602354

### H<sub>2</sub>O

|   |             |              |              |
|---|-------------|--------------|--------------|
| 8 | 0.000000000 | 0.000000000  | 0.117638000  |
| 1 | 0.000000000 | 0.767236000  | -0.470553000 |
| 1 | 0.000000000 | -0.767236000 | -0.470553000 |

-76.437760

### Et<sub>3</sub>N

|   |              |              |              |
|---|--------------|--------------|--------------|
| 7 | -0.000424000 | -0.301208000 | -0.038398000 |
| 6 | -1.219019000 | -1.086979000 | 0.188887000  |
| 1 | -1.079354000 | -2.062080000 | -0.290823000 |
| 1 | -1.375559000 | -1.284986000 | 1.268666000  |
| 6 | -2.470856000 | -0.429615000 | -0.395813000 |
| 1 | -2.351512000 | -0.267410000 | -1.472391000 |
| 1 | -2.683095000 | 0.537716000  | 0.070939000  |
| 1 | -3.342811000 | -1.072949000 | -0.234795000 |
| 6 | 1.217304000  | -1.088430000 | 0.188495000  |
| 1 | 1.373493000  | -1.287381000 | 1.268162000  |
| 1 | 1.076618000  | -2.063024000 | -0.291948000 |
| 6 | 2.470005000  | -0.432101000 | -0.395499000 |
| 1 | 2.683608000  | 0.534392000  | 0.072351000  |
| 1 | 2.350925000  | -0.268536000 | -1.471900000 |
| 1 | 3.341047000  | -1.076842000 | -0.235176000 |
| 6 | 0.000427000  | 0.981791000  | 0.695725000  |
| 1 | -0.874267000 | 1.030335000  | 1.358446000  |
| 1 | 0.874175000  | 1.028478000  | 1.359864000  |
| 6 | 0.002351000  | 2.197301000  | -0.234702000 |
| 1 | -0.882374000 | 2.190496000  | -0.879518000 |
| 1 | 0.887779000  | 2.188621000  | -0.878516000 |
| 1 | 0.003024000  | 3.129822000  | 0.342866000  |

-292.290967

**1**

|   |              |              |              |
|---|--------------|--------------|--------------|
| 7 | 0.548681000  | 1.447615000  | 0.071765000  |
| 1 | 0.713322000  | 1.499717000  | 1.076990000  |
| 1 | -0.346511000 | 1.903642000  | -0.093678000 |
| 6 | 0.459553000  | 0.037921000  | -0.343090000 |
| 1 | 0.334224000  | 0.035875000  | -1.434479000 |
| 6 | 1.757458000  | -0.691682000 | 0.008015000  |
| 1 | 2.612382000  | -0.187883000 | -0.451932000 |
| 1 | 1.914775000  | -0.705663000 | 1.093984000  |
| 1 | 1.735598000  | -1.728346000 | -0.343303000 |
| 6 | -0.747999000 | -0.694492000 | 0.250042000  |
| 1 | -0.766289000 | -1.735911000 | -0.102127000 |
| 1 | -0.672178000 | -0.698035000 | 1.348085000  |
| 8 | -1.934941000 | -0.003471000 | -0.169074000 |
| 1 | -2.700634000 | -0.399412000 | 0.266895000  |

-249.651016

**2**

|   |              |              |              |
|---|--------------|--------------|--------------|
| 7 | -0.884830000 | 1.081007000  | -0.909623000 |
| 1 | -0.819937000 | 1.875295000  | -1.545663000 |
| 1 | 0.067248000  | 0.719379000  | -0.771566000 |
| 6 | -1.443399000 | 1.514122000  | 0.384346000  |
| 1 | -1.266808000 | 0.689072000  | 1.084085000  |
| 6 | -0.821392000 | 2.794841000  | 0.950922000  |
| 1 | -1.268689000 | 3.061419000  | 1.916062000  |
| 1 | 0.255729000  | 2.665252000  | 1.097180000  |
| 1 | -0.971078000 | 3.634977000  | 0.261483000  |
| 6 | -2.962271000 | 1.651810000  | 0.210195000  |
| 1 | -3.458009000 | 1.760761000  | 1.179761000  |
| 1 | -3.183632000 | 2.549650000  | -0.390842000 |
| 8 | -3.499255000 | 0.488716000  | -0.424378000 |
| 1 | -2.826410000 | 0.262699000  | -1.095918000 |
| 6 | -2.175267000 | -2.131282000 | 0.119532000  |
| 8 | -2.521349000 | -2.389012000 | -0.967043000 |
| 8 | -1.813360000 | -1.897670000 | 1.206546000  |
| 7 | 1.882447000  | -0.026175000 | -0.103993000 |
| 6 | 2.884976000  | 1.053154000  | -0.125433000 |
| 1 | 3.909582000  | 0.652941000  | -0.022257000 |
| 1 | 2.707799000  | 1.682885000  | 0.753461000  |
| 6 | 2.802455000  | 1.930322000  | -1.377923000 |
| 1 | 3.003159000  | 1.366292000  | -2.293460000 |
| 1 | 3.543883000  | 2.734199000  | -1.317819000 |

|   |             |              |              |
|---|-------------|--------------|--------------|
| 1 | 1.809768000 | 2.383905000  | -1.466638000 |
| 6 | 2.241974000 | -1.128501000 | -1.011738000 |
| 1 | 2.452614000 | -0.688776000 | -1.990740000 |
| 1 | 3.174997000 | -1.625728000 | -0.689687000 |
| 6 | 1.133287000 | -2.168163000 | -1.180048000 |
| 1 | 0.197037000 | -1.686548000 | -1.479064000 |
| 1 | 0.955227000 | -2.737811000 | -0.262687000 |
| 1 | 1.413639000 | -2.883375000 | -1.959892000 |
| 6 | 1.551779000 | -0.459596000 | 1.266995000  |
| 1 | 1.237255000 | 0.436284000  | 1.814360000  |
| 1 | 0.670862000 | -1.105564000 | 1.218233000  |
| 6 | 2.664383000 | -1.171020000 | 2.053879000  |
| 1 | 3.557739000 | -0.544672000 | 2.147220000  |
| 1 | 2.957454000 | -2.113603000 | 1.580357000  |
| 1 | 2.309808000 | -1.403150000 | 3.063990000  |

-730.531956

**TS1**

|   |              |              |              |
|---|--------------|--------------|--------------|
| 7 | -1.146207000 | 0.216558000  | -0.485594000 |
| 1 | -1.370951000 | 0.460252000  | -1.450212000 |
| 1 | -0.115603000 | 0.238575000  | -0.395743000 |
| 6 | -1.793652000 | 1.142263000  | 0.463794000  |
| 1 | -1.695324000 | 0.680423000  | 1.454094000  |
| 6 | -1.144006000 | 2.532474000  | 0.488379000  |
| 1 | -1.624915000 | 3.173715000  | 1.235249000  |
| 1 | -0.083422000 | 2.457725000  | 0.741086000  |
| 1 | -1.227022000 | 3.020908000  | -0.489528000 |
| 6 | -3.287303000 | 1.266655000  | 0.141095000  |
| 1 | -3.754032000 | 1.931076000  | 0.873700000  |
| 1 | -3.410212000 | 1.725645000  | -0.852374000 |
| 8 | -4.004374000 | 0.032262000  | 0.215104000  |
| 1 | -3.781769000 | -0.510550000 | -0.553879000 |
| 6 | -1.641180000 | -1.834566000 | -0.062707000 |
| 8 | -2.174315000 | -2.186317000 | -1.068284000 |
| 8 | -1.217684000 | -1.953491000 | 1.039224000  |
| 7 | 1.882852000  | 0.154370000  | -0.096955000 |
| 6 | 2.515896000  | 1.475570000  | -0.271951000 |
| 1 | 3.616767000  | 1.401168000  | -0.229926000 |
| 1 | 2.218187000  | 2.099121000  | 0.578128000  |
| 6 | 2.098427000  | 2.176885000  | -1.567243000 |
| 1 | 2.436322000  | 1.639001000  | -2.458015000 |
| 1 | 2.535923000  | 3.180384000  | -1.603946000 |
| 1 | 1.009897000  | 2.273829000  | -1.620284000 |
| 6 | 2.507828000  | -0.858141000 | -0.968994000 |
| 1 | 2.560362000  | -0.433782000 | -1.975175000 |

|   |             |              |              |
|---|-------------|--------------|--------------|
| 1 | 3.550736000 | -1.053062000 | -0.663005000 |
| 6 | 1.738465000 | -2.176797000 | -1.046013000 |
| 1 | 0.718918000 | -2.013516000 | -1.407515000 |
| 1 | 1.683431000 | -2.686742000 | -0.080088000 |
| 1 | 2.240602000 | -2.850798000 | -1.747682000 |
| 6 | 1.807492000 | -0.245840000 | 1.324445000  |
| 1 | 1.264092000 | 0.550674000  | 1.846938000  |
| 1 | 1.172671000 | -1.132952000 | 1.390994000  |
| 6 | 3.139470000 | -0.505558000 | 2.045032000  |
| 1 | 3.794261000 | 0.371710000  | 2.019507000  |
| 1 | 3.682409000 | -1.348926000 | 1.606845000  |
| 1 | 2.944531000 | -0.747680000 | 3.095303000  |

-730.522948

**3**

|   |              |              |              |
|---|--------------|--------------|--------------|
| 7 | -1.086094000 | 0.057390000  | -0.345936000 |
| 1 | -1.270451000 | 0.276938000  | -1.327867000 |
| 1 | -0.031099000 | 0.172634000  | -0.190760000 |
| 6 | -1.898252000 | 0.963069000  | 0.545925000  |
| 1 | -1.815581000 | 0.528404000  | 1.545837000  |
| 6 | -1.329493000 | 2.381030000  | 0.532082000  |
| 1 | -1.894089000 | 3.006239000  | 1.229430000  |
| 1 | -0.284079000 | 2.392163000  | 0.844951000  |
| 1 | -1.401770000 | 2.832722000  | -0.463013000 |
| 6 | -3.372059000 | 0.964741000  | 0.109537000  |
| 1 | -3.896078000 | 1.704838000  | 0.720336000  |
| 1 | -3.440977000 | 1.292129000  | -0.939525000 |
| 8 | -4.052695000 | -0.268378000 | 0.306993000  |
| 1 | -3.736151000 | -0.916140000 | -0.345024000 |
| 6 | -1.423895000 | -1.487439000 | -0.131637000 |
| 8 | -2.086383000 | -1.949892000 | -1.072147000 |
| 8 | -0.973202000 | -1.918786000 | 0.925005000  |
| 7 | 1.757806000  | 0.220433000  | -0.054859000 |
| 6 | 2.246582000  | 1.611667000  | -0.197124000 |
| 1 | 3.346630000  | 1.645943000  | -0.143665000 |
| 1 | 1.876275000  | 2.173191000  | 0.666994000  |
| 6 | 1.788732000  | 2.302262000  | -1.483362000 |
| 1 | 2.268087000  | 1.884418000  | -2.372575000 |
| 1 | 2.049911000  | 3.364262000  | -1.437322000 |
| 1 | 0.705015000  | 2.228608000  | -1.613167000 |
| 6 | 2.355155000  | -0.648959000 | -1.099914000 |
| 1 | 2.014016000  | -0.269534000 | -2.066982000 |
| 1 | 3.453304000  | -0.548144000 | -1.092026000 |
| 6 | 1.980665000  | -2.127213000 | -1.002931000 |
| 1 | 0.898401000  | -2.273604000 | -0.996230000 |

|   |             |              |              |
|---|-------------|--------------|--------------|
| 1 | 2.391065000 | -2.605500000 | -0.109432000 |
| 1 | 2.386260000 | -2.650551000 | -1.874436000 |
| 6 | 1.962701000 | -0.284964000 | 1.327631000  |
| 1 | 1.453596000 | 0.419824000  | 1.995285000  |
| 1 | 1.417919000 | -1.227272000 | 1.413615000  |
| 6 | 3.415888000 | -0.463285000 | 1.787563000  |
| 1 | 3.970006000 | 0.479959000  | 1.776235000  |
| 1 | 3.955813000 | -1.183167000 | 1.164610000  |
| 1 | 3.424093000 | -0.842117000 | 2.814864000  |

-730.523496

**TS2**

|   |              |              |              |
|---|--------------|--------------|--------------|
| 7 | 1.230507000  | 0.205762000  | -0.464897000 |
| 1 | 1.292290000  | -0.242653000 | -1.384031000 |
| 1 | 0.225029000  | 0.048259000  | -0.127300000 |
| 6 | 2.259883000  | -0.405093000 | 0.431020000  |
| 1 | 3.195461000  | 0.116686000  | 0.208196000  |
| 6 | 1.908815000  | -0.208909000 | 1.902049000  |
| 1 | 1.844309000  | 0.854714000  | 2.136680000  |
| 1 | 0.956549000  | -0.687030000 | 2.152130000  |
| 1 | 2.687966000  | -0.652783000 | 2.528614000  |
| 6 | 2.411639000  | -1.885732000 | 0.063788000  |
| 1 | 3.235004000  | -2.314884000 | 0.646842000  |
| 1 | 1.499572000  | -2.436408000 | 0.309977000  |
| 8 | 2.611552000  | -2.070977000 | -1.341299000 |
| 1 | 3.511438000  | -1.800187000 | -1.571999000 |
| 6 | 1.338535000  | 1.782180000  | -0.751066000 |
| 8 | 0.566460000  | 2.100583000  | -1.659009000 |
| 8 | 2.138094000  | 2.364200000  | -0.019680000 |
| 7 | -1.537876000 | -0.018403000 | 0.120286000  |
| 6 | -1.964533000 | 1.360612000  | 0.462961000  |
| 1 | -3.059481000 | 1.405627000  | 0.583071000  |
| 1 | -1.700704000 | 1.990926000  | -0.390456000 |
| 6 | -1.295813000 | 1.926060000  | 1.716955000  |
| 1 | -1.576520000 | 1.385432000  | 2.625321000  |
| 1 | -1.603278000 | 2.968632000  | 1.846701000  |
| 1 | -0.206165000 | 1.910352000  | 1.628904000  |
| 6 | -1.977331000 | -0.989898000 | 1.146819000  |
| 1 | -1.453589000 | -0.741122000 | 2.074139000  |
| 1 | -3.053420000 | -0.869829000 | 1.356929000  |
| 6 | -1.694831000 | -2.450089000 | 0.796273000  |
| 1 | -2.326651000 | -2.809100000 | -0.021073000 |
| 1 | -1.896653000 | -3.076003000 | 1.670856000  |
| 1 | -0.650369000 | -2.601713000 | 0.508929000  |
| 6 | -1.955878000 | -0.369622000 | -1.260603000 |

|   |              |              |              |
|---|--------------|--------------|--------------|
| 1 | -1.523177000 | 0.401216000  | -1.904419000 |
| 1 | -1.452669000 | -1.303403000 | -1.526104000 |
| 6 | -3.479771000 | -0.496395000 | -1.514621000 |
| 1 | -3.744662000 | -1.500906000 | -1.858230000 |
| 1 | -3.817968000 | 0.215826000  | -2.272786000 |
| 1 | -4.063876000 | -0.302298000 | -0.610157000 |

-730.522332

**4**

|   |              |              |              |
|---|--------------|--------------|--------------|
| 7 | 1.120354000  | -0.049827000 | 0.670379000  |
| 1 | 1.100407000  | -0.046105000 | 1.686585000  |
| 1 | -0.666041000 | 0.093318000  | 0.266795000  |
| 6 | 1.913580000  | 1.072096000  | 0.116961000  |
| 1 | 1.595095000  | 1.212529000  | -0.922504000 |
| 6 | 1.582001000  | 2.328997000  | 0.929636000  |
| 1 | 2.025309000  | 3.214152000  | 0.465470000  |
| 1 | 0.501886000  | 2.486016000  | 0.999398000  |
| 1 | 1.975884000  | 2.248225000  | 1.950160000  |
| 6 | 3.437922000  | 0.832671000  | 0.105095000  |
| 1 | 3.952163000  | 1.798490000  | 0.042869000  |
| 1 | 3.724104000  | 0.364642000  | 1.062277000  |
| 8 | 3.887001000  | 0.059058000  | -1.001721000 |
| 1 | 3.213713000  | -0.655746000 | -1.116293000 |
| 6 | 1.234383000  | -1.408347000 | 0.191788000  |
| 8 | 0.678637000  | -2.267079000 | 0.919365000  |
| 8 | 1.791813000  | -1.583190000 | -0.932843000 |
| 7 | -1.699158000 | 0.175075000  | 0.056852000  |
| 6 | -2.379139000 | 0.310601000  | 1.401864000  |
| 1 | -3.442594000 | 0.471945000  | 1.218204000  |
| 1 | -1.966494000 | 1.219504000  | 1.847460000  |
| 6 | -2.151443000 | -0.888099000 | 2.317729000  |
| 1 | -2.754126000 | -1.750098000 | 2.021871000  |
| 1 | -2.449329000 | -0.605645000 | 3.331319000  |
| 1 | -1.100939000 | -1.193143000 | 2.328741000  |
| 6 | -2.109169000 | -1.088355000 | -0.671105000 |
| 1 | -1.786054000 | -1.910196000 | -0.033312000 |
| 1 | -3.200477000 | -1.088347000 | -0.723726000 |
| 6 | -1.471760000 | -1.230992000 | -2.048070000 |
| 1 | -0.381787000 | -1.163094000 | -1.992385000 |
| 1 | -1.846792000 | -0.498547000 | -2.767244000 |
| 1 | -1.720985000 | -2.225408000 | -2.428920000 |
| 6 | -1.837564000 | 1.436182000  | -0.769033000 |
| 1 | -1.490298000 | 2.251570000  | -0.131152000 |
| 1 | -1.131880000 | 1.344175000  | -1.595601000 |
| 6 | -3.246249000 | 1.713513000  | -1.278185000 |

|   |              |             |              |
|---|--------------|-------------|--------------|
| 1 | -3.960691000 | 1.860752000 | -0.464860000 |
| 1 | -3.615304000 | 0.918136000 | -1.930108000 |
| 1 | -3.218126000 | 2.636217000 | -1.864148000 |

-730.531888

**5**

|   |              |              |              |
|---|--------------|--------------|--------------|
| 7 | 1.407048000  | 0.254016000  | -0.716091000 |
| 1 | 1.277465000  | 0.413592000  | -1.710262000 |
| 1 | -0.552644000 | 0.320617000  | -0.213724000 |
| 6 | 1.952866000  | -1.057719000 | -0.280426000 |
| 1 | 1.152462000  | -1.816613000 | -0.242983000 |
| 6 | 3.099605000  | -1.525579000 | -1.176563000 |
| 1 | 3.485140000  | -2.482711000 | -0.810755000 |
| 1 | 2.746764000  | -1.677207000 | -2.201921000 |
| 1 | 3.923548000  | -0.802242000 | -1.194223000 |
| 6 | 2.402821000  | -0.657876000 | 1.133391000  |
| 1 | 1.611166000  | -0.790961000 | 1.876044000  |
| 1 | 3.313667000  | -1.158274000 | 1.462833000  |
| 8 | -0.318298000 | -3.132493000 | -0.259499000 |
| 1 | -0.326816000 | -3.910971000 | 0.314864000  |
| 6 | 2.076860000  | 1.273474000  | -0.057315000 |
| 8 | 2.106630000  | 2.454868000  | -0.356515000 |
| 8 | 2.687399000  | 0.771961000  | 1.041062000  |
| 7 | -1.583969000 | 0.386394000  | -0.114625000 |
| 6 | -1.993405000 | 1.710866000  | -0.724045000 |
| 1 | -3.081158000 | 1.765477000  | -0.657862000 |
| 1 | -1.717466000 | 1.648664000  | -1.779192000 |
| 6 | -1.343730000 | 2.925597000  | -0.072075000 |
| 1 | -1.703002000 | 3.094639000  | 0.945679000  |
| 1 | -1.608485000 | 3.806152000  | -0.664714000 |
| 1 | -0.253213000 | 2.848360000  | -0.061683000 |
| 6 | -1.879235000 | 0.329212000  | 1.370628000  |
| 1 | -1.227787000 | 1.073659000  | 1.829598000  |
| 1 | -2.912669000 | 0.658610000  | 1.502564000  |
| 6 | -1.637160000 | -1.042530000 | 1.989748000  |
| 1 | -0.714162000 | -1.502918000 | 1.626082000  |
| 1 | -2.444009000 | -1.741795000 | 1.761260000  |
| 1 | -1.584066000 | -0.924099000 | 3.075726000  |
| 6 | -2.123009000 | -0.795793000 | -0.909521000 |
| 1 | -1.796293000 | -0.617272000 | -1.938020000 |
| 1 | -1.592574000 | -1.692261000 | -0.545476000 |
| 6 | -3.636900000 | -0.945686000 | -0.845875000 |
| 1 | -4.173727000 | -0.102815000 | -1.290052000 |
| 1 | -3.997637000 | -1.088939000 | 0.176291000  |
| 1 | -3.904184000 | -1.842048000 | -1.413134000 |

-730.484054

**6**

|   |              |              |              |
|---|--------------|--------------|--------------|
| 7 | 0.146446000  | -0.815177000 | 0.631768000  |
| 1 | 0.198194000  | -1.819956000 | 0.725723000  |
| 6 | -1.128495000 | -0.106265000 | 0.497305000  |
| 1 | -1.669188000 | -0.121255000 | 1.447709000  |
| 6 | -2.007995000 | -0.670096000 | -0.620519000 |
| 1 | -1.490887000 | -0.616284000 | -1.584583000 |
| 1 | -2.263675000 | -1.715464000 | -0.420948000 |
| 1 | -2.938802000 | -0.097727000 | -0.690768000 |
| 6 | -0.584311000 | 1.310621000  | 0.209661000  |
| 1 | -1.170410000 | 1.855477000  | -0.531429000 |
| 1 | -0.482290000 | 1.906271000  | 1.121073000  |
| 6 | 1.158641000  | -0.167183000 | -0.014030000 |
| 8 | 0.743765000  | 1.092897000  | -0.336951000 |
| 8 | 2.276847000  | -0.578808000 | -0.278506000 |

-361.820170

**7 (Singlet)**

|    |              |              |              |
|----|--------------|--------------|--------------|
| 25 | 0.000175000  | 0.029277000  | 0.075676000  |
| 15 | -2.239629000 | 0.073693000  | -0.325644000 |
| 15 | 2.239801000  | 0.073012000  | -0.325445000 |
| 8  | -0.000844000 | -2.198967000 | 2.009211000  |
| 8  | 0.000861000  | 2.001016000  | 2.245952000  |
| 7  | 0.000354000  | -1.192954000 | -1.734559000 |
| 6  | -1.240598000 | -1.988512000 | -1.875150000 |
| 1  | -1.267710000 | -2.701901000 | -1.046076000 |
| 1  | -1.236384000 | -2.557974000 | -2.816204000 |
| 6  | 1.240430000  | -1.990362000 | -1.873557000 |
| 1  | 1.236261000  | -2.560261000 | -2.814244000 |
| 1  | 1.265934000  | -2.703063000 | -1.043638000 |
| 6  | -3.005959000 | 1.670677000  | -0.958957000 |
| 1  | -2.381210000 | 1.857678000  | -1.842265000 |
| 6  | 3.472602000  | -0.598369000 | 0.929931000  |
| 1  | 4.472817000  | -0.318094000 | 0.579257000  |
| 6  | 2.438926000  | -1.041949000 | -1.819010000 |
| 1  | 2.441274000  | -0.403847000 | -2.710866000 |
| 1  | 3.383229000  | -1.592877000 | -1.815517000 |
| 6  | 3.005817000  | 1.669053000  | -0.961661000 |
| 1  | 2.382206000  | 1.853512000  | -1.846238000 |
| 6  | -2.438134000 | -1.038631000 | -1.820867000 |
| 1  | -3.382932000 | -1.588612000 | -1.819406000 |
| 1  | -2.438623000 | -0.399280000 | -2.711979000 |



|   |              |              |              |
|---|--------------|--------------|--------------|
| 6 | -3.227355000 | 0.037761000  | 2.307114000  |
| 1 | -2.235844000 | -0.231649000 | 2.684158000  |
| 1 | -3.975019000 | -0.322568000 | 3.023975000  |
| 1 | -3.287677000 | 1.128673000  | 2.281252000  |
| 6 | -3.418611000 | -2.134157000 | 1.037076000  |
| 1 | -3.671577000 | -2.631682000 | 0.096399000  |
| 1 | -4.142973000 | -2.470353000 | 1.788659000  |
| 1 | -2.430759000 | -2.478326000 | 1.352438000  |
| 6 | -3.472347000 | -0.599988000 | 0.927753000  |
| 1 | -4.473547000 | -0.319302000 | 0.578335000  |
| 6 | -0.000473000 | -1.342354000 | 1.197204000  |
| 6 | 0.000392000  | 1.200073000  | 1.383336000  |
| 6 | -2.811584000 | 2.856348000  | -0.002075000 |
| 1 | -3.433937000 | 2.757637000  | 0.893258000  |
| 1 | -3.107983000 | 3.786409000  | -0.502106000 |
| 1 | -1.769440000 | 2.953095000  | 0.310795000  |
| 6 | -4.471255000 | 1.552804000  | -1.406954000 |
| 1 | -4.637060000 | 0.707833000  | -2.082806000 |
| 1 | -4.771222000 | 2.465545000  | -1.935777000 |
| 1 | -5.144182000 | 1.438492000  | -0.550177000 |
| 6 | 4.471800000  | 1.550964000  | -1.407719000 |
| 1 | 5.143913000  | 1.439425000  | -0.549894000 |
| 1 | 4.771717000  | 2.462474000  | -1.938648000 |
| 1 | 4.638781000  | 0.704234000  | -2.081190000 |
| 6 | 3.418659000  | -2.132310000 | 1.041387000  |
| 1 | 2.430358000  | -2.475896000 | 1.356833000  |
| 1 | 4.142341000  | -2.467273000 | 1.794195000  |
| 1 | 3.672372000  | -2.631496000 | 0.101988000  |
| 6 | 3.227155000  | 0.042051000  | 2.307547000  |
| 1 | 3.287272000  | 1.132940000  | 2.279974000  |
| 1 | 3.974788000  | -0.316722000 | 3.025123000  |
| 1 | 2.235595000  | -0.226803000 | 2.684908000  |
| 6 | 2.809617000  | 2.856926000  | -0.007836000 |
| 1 | 1.766939000  | 2.953846000  | 0.303198000  |
| 1 | 3.106387000  | 3.785907000  | -0.509642000 |
| 1 | 3.430463000  | 2.760784000  | 0.888851000  |
| 1 | 0.000070000  | 1.290450000  | -0.934659000 |
| 1 | 0.001297000  | -0.499320000 | -2.482597000 |

-1700.378366

### 7 (Triplet)

|    |              |              |              |
|----|--------------|--------------|--------------|
| 25 | -0.001145000 | 0.544070000  | -0.004058000 |
| 15 | -2.243060000 | -0.285504000 | -0.327183000 |
| 15 | 2.247239000  | -0.279302000 | -0.305939000 |
| 8  | -0.007276000 | 0.406342000  | 2.981196000  |

|   |              |              |              |
|---|--------------|--------------|--------------|
| 8 | -0.034974000 | 3.491553000  | 0.726767000  |
| 7 | 0.009050000  | -2.422278000 | -0.921495000 |
| 6 | -1.246412000 | -2.946925000 | -0.412748000 |
| 1 | -1.192863000 | -2.936883000 | 0.681534000  |
| 1 | -1.438060000 | -3.993470000 | -0.711797000 |
| 6 | 1.240666000  | -2.938656000 | -0.349895000 |
| 1 | 1.437344000  | -3.994903000 | -0.609592000 |
| 1 | 1.146299000  | -2.893503000 | 0.741343000  |
| 6 | -3.123433000 | 0.619045000  | -1.729550000 |
| 1 | -2.608672000 | 0.204368000  | -2.606454000 |
| 6 | 3.462248000  | -0.178754000 | 1.127977000  |
| 1 | 4.446952000  | -0.446389000 | 0.725074000  |
| 6 | 2.414459000  | -2.071605000 | -0.822178000 |
| 1 | 2.455570000  | -2.093085000 | -1.917963000 |
| 1 | 3.366024000  | -2.476936000 | -0.462272000 |
| 6 | 3.106766000  | 0.580882000  | -1.747530000 |
| 1 | 2.545576000  | 0.171305000  | -2.597896000 |
| 6 | -2.399774000 | -2.060048000 | -0.900829000 |
| 1 | -3.364811000 | -2.471146000 | -0.584937000 |
| 1 | -2.403187000 | -2.048904000 | -1.997580000 |
| 6 | -3.527761000 | 1.165754000  | 1.724794000  |
| 1 | -2.538295000 | 1.511121000  | 2.039964000  |
| 1 | -4.182512000 | 1.159366000  | 2.604230000  |
| 1 | -3.930238000 | 1.896069000  | 1.018290000  |
| 6 | -3.079257000 | -1.285634000 | 2.188386000  |
| 1 | -3.138014000 | -2.309856000 | 1.808070000  |
| 1 | -3.780953000 | -1.209182000 | 3.027639000  |
| 1 | -2.072103000 | -1.122342000 | 2.581908000  |
| 6 | -3.449131000 | -0.243581000 | 1.117569000  |
| 1 | -4.433169000 | -0.513266000 | 0.715638000  |
| 6 | -0.004542000 | 0.392568000  | 1.804198000  |
| 6 | -0.015303000 | 2.374660000  | 0.393943000  |
| 6 | -2.864181000 | 2.134144000  | -1.729295000 |
| 1 | -3.334318000 | 2.632055000  | -0.875831000 |
| 1 | -3.282518000 | 2.577935000  | -2.641109000 |
| 1 | -1.792227000 | 2.343536000  | -1.701275000 |
| 6 | -4.623550000 | 0.306967000  | -1.847368000 |
| 1 | -4.829854000 | -0.768352000 | -1.852138000 |
| 1 | -5.016077000 | 0.725469000  | -2.781974000 |
| 1 | -5.189594000 | 0.758599000  | -1.025201000 |
| 6 | 4.589841000  | 0.218295000  | -1.916562000 |
| 1 | 5.200552000  | 0.656070000  | -1.119469000 |
| 1 | 4.961336000  | 0.617328000  | -2.868039000 |
| 1 | 4.759233000  | -0.863170000 | -1.920540000 |
| 6 | 3.114642000  | -1.191467000 | 2.233999000  |
| 1 | 2.126065000  | -0.999078000 | 2.659194000  |

|   |             |              |              |
|---|-------------|--------------|--------------|
| 1 | 3.847511000 | -1.108272000 | 3.045367000  |
| 1 | 3.140858000 | -2.225771000 | 1.878289000  |
| 6 | 3.526848000 | 1.246597000  | 1.699151000  |
| 1 | 3.911938000 | 1.966364000  | 0.972858000  |
| 1 | 4.190421000 | 1.271251000  | 2.571785000  |
| 1 | 2.535209000 | 1.585051000  | 2.016611000  |
| 6 | 2.896893000 | 2.102906000  | -1.759781000 |
| 1 | 1.837073000 | 2.350537000  | -1.664658000 |
| 1 | 3.267225000 | 2.518062000  | -2.704971000 |
| 1 | 3.441483000 | 2.597949000  | -0.950413000 |
| 1 | 0.002480000 | 0.683318000  | -1.617201000 |
| 1 | 0.034803000 | -2.458995000 | -1.937136000 |

-1700.338063

**8 (Singlet)**

|    |              |              |              |
|----|--------------|--------------|--------------|
| 25 | -0.901877000 | 0.595272000  | 0.058426000  |
| 15 | 0.786552000  | 2.113070000  | -0.023374000 |
| 15 | -1.924408000 | -1.434941000 | -0.060448000 |
| 8  | -2.868413000 | 2.107345000  | -1.537865000 |
| 8  | -2.106990000 | 1.480292000  | 2.578793000  |
| 7  | 0.260930000  | -0.266032000 | -1.698618000 |
| 6  | 0.901493000  | 0.804404000  | -2.488171000 |
| 1  | 0.103929000  | 1.405635000  | -2.935376000 |
| 1  | 1.508649000  | 0.384532000  | -3.304770000 |
| 6  | -0.565556000 | -1.200872000 | -2.487088000 |
| 1  | 0.026032000  | -1.669861000 | -3.288285000 |
| 1  | -1.367644000 | -0.621310000 | -2.954271000 |
| 6  | 2.124108000  | 1.991133000  | 1.292023000  |
| 1  | 2.422642000  | 0.941117000  | 1.176758000  |
| 6  | -3.778272000 | -1.553709000 | -0.364071000 |
| 1  | -4.074088000 | -2.589163000 | -0.157686000 |
| 6  | -1.136163000 | -2.265228000 | -1.548173000 |
| 1  | -0.320275000 | -2.887578000 | -1.165413000 |
| 1  | -1.825249000 | -2.930777000 | -2.074390000 |
| 6  | -1.568275000 | -2.702237000 | 1.276951000  |
| 1  | -0.471642000 | -2.719375000 | 1.264867000  |
| 6  | 1.768596000  | 1.657145000  | -1.558834000 |
| 1  | 2.158414000  | 2.535766000  | -2.078480000 |
| 1  | 2.634522000  | 1.072192000  | -1.233907000 |
| 6  | -0.583882000 | 4.412853000  | 0.828157000  |
| 1  | -1.545116000 | 3.915137000  | 0.665527000  |
| 1  | -0.741334000 | 5.495172000  | 0.747952000  |
| 1  | -0.268247000 | 4.195030000  | 1.851547000  |
| 6  | -0.052180000 | 4.304417000  | -1.634148000 |
| 1  | 0.690107000  | 4.088544000  | -2.408004000 |

|   |              |              |              |
|---|--------------|--------------|--------------|
| 1 | -0.273853000 | 5.377225000  | -1.685807000 |
| 1 | -0.970429000 | 3.764108000  | -1.879843000 |
| 6 | 0.444625000  | 3.953213000  | -0.220529000 |
| 1 | 1.391567000  | 4.479232000  | -0.048146000 |
| 6 | -2.060598000 | 1.488564000  | -0.939161000 |
| 6 | -1.631520000 | 1.132080000  | 1.559028000  |
| 6 | 1.578875000  | 2.146002000  | 2.718637000  |
| 1 | 1.301042000  | 3.182869000  | 2.934515000  |
| 1 | 2.351408000  | 1.858294000  | 3.441846000  |
| 1 | 0.704994000  | 1.510631000  | 2.879210000  |
| 6 | 3.351820000  | 2.885987000  | 1.062579000  |
| 1 | 3.759016000  | 2.793563000  | 0.050078000  |
| 1 | 4.146349000  | 2.610117000  | 1.766502000  |
| 1 | 3.116126000  | 3.941608000  | 1.235721000  |
| 6 | -2.089673000 | -4.118607000 | 0.984310000  |
| 1 | -3.182609000 | -4.168688000 | 1.043803000  |
| 1 | -1.692212000 | -4.818009000 | 1.730004000  |
| 1 | -1.788834000 | -4.483096000 | -0.003323000 |
| 6 | -4.159244000 | -1.225031000 | -1.818170000 |
| 1 | -3.841782000 | -0.215735000 | -2.094968000 |
| 1 | -5.249360000 | -1.271760000 | -1.929124000 |
| 1 | -3.728801000 | -1.930270000 | -2.535045000 |
| 6 | -4.525607000 | -0.617622000 | 0.602862000  |
| 1 | -4.295283000 | -0.824326000 | 1.651029000  |
| 1 | -5.608512000 | -0.726383000 | 0.467710000  |
| 1 | -4.259049000 | 0.425053000  | 0.406078000  |
| 6 | -2.001421000 | -2.232777000 | 2.673617000  |
| 1 | -1.647779000 | -1.220970000 | 2.884999000  |
| 1 | -1.586292000 | -2.905870000 | 3.433421000  |
| 1 | -3.091045000 | -2.249964000 | 2.785499000  |
| 1 | 0.989695000  | -0.809977000 | -1.232249000 |
| 1 | 0.170203000  | -0.234001000 | 0.975380000  |
| 7 | 2.530772000  | -2.425238000 | -0.434549000 |
| 1 | 2.007980000  | -3.234492000 | -0.745504000 |
| 6 | 3.778783000  | -2.057505000 | -1.118375000 |
| 1 | 3.554004000  | -1.510620000 | -2.038935000 |
| 6 | 4.660783000  | -3.267318000 | -1.432052000 |
| 1 | 4.938528000  | -3.793664000 | -0.512119000 |
| 1 | 4.135300000  | -3.967504000 | -2.089753000 |
| 1 | 5.575347000  | -2.943047000 | -1.939331000 |
| 6 | 4.378682000  | -1.108617000 | -0.054350000 |
| 1 | 5.455678000  | -1.231808000 | 0.069646000  |
| 1 | 4.149501000  | -0.058408000 | -0.250295000 |
| 6 | 2.655951000  | -2.274846000 | 0.928057000  |
| 8 | 3.734946000  | -1.485308000 | 1.190061000  |
| 8 | 1.948369000  | -2.737655000 | 1.803159000  |

-2062.186089

**8 (Triplet)**

|    |              |              |              |
|----|--------------|--------------|--------------|
| 25 | -1.232715000 | 0.433133000  | 0.393345000  |
| 15 | 0.200087000  | 2.299031000  | -0.110735000 |
| 15 | -1.423413000 | -1.899917000 | -0.167504000 |
| 8  | -3.598679000 | 1.377755000  | -1.169952000 |
| 8  | -3.142941000 | 1.132324000  | 2.651739000  |
| 7  | 0.752048000  | -0.302294000 | -1.752771000 |
| 6  | 1.008658000  | 0.937303000  | -2.462993000 |
| 1  | 0.076717000  | 1.252999000  | -2.946540000 |
| 1  | 1.766534000  | 0.837506000  | -3.262569000 |
| 6  | 0.126414000  | -1.389563000 | -2.484935000 |
| 1  | 0.772172000  | -1.809396000 | -3.278786000 |
| 1  | -0.768283000 | -0.994660000 | -2.980459000 |
| 6  | 1.322682000  | 2.702930000  | 1.346363000  |
| 1  | 1.922749000  | 1.785233000  | 1.391504000  |
| 6  | -3.074790000 | -2.569310000 | -0.774803000 |
| 1  | -2.983186000 | -3.662402000 | -0.797987000 |
| 6  | -0.248402000 | -2.498998000 | -1.493301000 |
| 1  | 0.656158000  | -2.849290000 | -0.982570000 |
| 1  | -0.676016000 | -3.360708000 | -2.016621000 |
| 6  | -0.922317000 | -3.004089000 | 1.272488000  |
| 1  | 0.157203000  | -2.816222000 | 1.310934000  |
| 6  | 1.471513000  | 1.992959000  | -1.450619000 |
| 1  | 1.731473000  | 2.931721000  | -1.950122000 |
| 1  | 2.383238000  | 1.636051000  | -0.957668000 |
| 6  | -1.655645000 | 4.389105000  | 0.309132000  |
| 1  | -2.451184000 | 3.638829000  | 0.363947000  |
| 1  | -2.097515000 | 5.328066000  | -0.044996000 |
| 1  | -1.284764000 | 4.560282000  | 1.322500000  |
| 6  | -1.083651000 | 3.853605000  | -2.093137000 |
| 1  | -0.297289000 | 3.641015000  | -2.823268000 |
| 1  | -1.535270000 | 4.813525000  | -2.370569000 |
| 1  | -1.855660000 | 3.084286000  | -2.186771000 |
| 6  | -0.544216000 | 3.938682000  | -0.653396000 |
| 1  | 0.265971000  | 4.678499000  | -0.636291000 |
| 6  | -2.639018000 | 0.992578000  | -0.607589000 |
| 6  | -2.372879000 | 0.852740000  | 1.822038000  |
| 6  | 0.574384000  | 2.806882000  | 2.684001000  |
| 1  | -0.019087000 | 3.723506000  | 2.749346000  |
| 1  | 1.297187000  | 2.825989000  | 3.508611000  |
| 1  | -0.090186000 | 1.951609000  | 2.827609000  |
| 6  | 2.260332000  | 3.900526000  | 1.132609000  |
| 1  | 2.820145000  | 3.834497000  | 0.193987000  |

|   |              |              |              |
|---|--------------|--------------|--------------|
| 1 | 2.988175000  | 3.949177000  | 1.951559000  |
| 1 | 1.706514000  | 4.845459000  | 1.132583000  |
| 6 | -1.142835000 | -4.505353000 | 1.030552000  |
| 1 | -2.207907000 | -4.762350000 | 1.037797000  |
| 1 | -0.662219000 | -5.081212000 | 1.830496000  |
| 1 | -0.717585000 | -4.842196000 | 0.079652000  |
| 6 | -3.382768000 | -2.087180000 | -2.203403000 |
| 1 | -3.413325000 | -0.995446000 | -2.260439000 |
| 1 | -4.365037000 | -2.464029000 | -2.513079000 |
| 1 | -2.651200000 | -2.448531000 | -2.931957000 |
| 6 | -4.213451000 | -2.185607000 | 0.183663000  |
| 1 | -4.067751000 | -2.597831000 | 1.185212000  |
| 1 | -5.167932000 | -2.568491000 | -0.197242000 |
| 1 | -4.296863000 | -1.097768000 | 0.275581000  |
| 6 | -1.513577000 | -2.559808000 | 2.619404000  |
| 1 | -1.321081000 | -1.499214000 | 2.799970000  |
| 1 | -1.051826000 | -3.137356000 | 3.429691000  |
| 1 | -2.593643000 | -2.728819000 | 2.672871000  |
| 1 | 1.596397000  | -0.628669000 | -1.288795000 |
| 1 | 0.035884000  | -0.061500000 | 1.266285000  |
| 7 | 3.572790000  | -1.622219000 | -0.693087000 |
| 1 | 3.553029000  | -2.249058000 | -1.487593000 |
| 6 | 4.627838000  | -0.612085000 | -0.552774000 |
| 1 | 4.429143000  | 0.229565000  | -1.222930000 |
| 6 | 6.027157000  | -1.171759000 | -0.812971000 |
| 1 | 6.255201000  | -1.985135000 | -0.115676000 |
| 1 | 6.105603000  | -1.555909000 | -1.834914000 |
| 1 | 6.775266000  | -0.382285000 | -0.686111000 |
| 6 | 4.381443000  | -0.202842000 | 0.917183000  |
| 1 | 5.301953000  | -0.033358000 | 1.477249000  |
| 1 | 3.729228000  | 0.670002000  | 1.000849000  |
| 6 | 3.206399000  | -2.136000000 | 0.524606000  |
| 8 | 3.693313000  | -1.335393000 | 1.510964000  |
| 8 | 2.531201000  | -3.126902000 | 0.746495000  |

-2062.144316

### TS3

|    |              |              |              |
|----|--------------|--------------|--------------|
| 25 | 0.098955000  | -0.649049000 | 0.134265000  |
| 15 | -2.196941000 | -0.767789000 | -0.079196000 |
| 15 | 2.378676000  | -0.253854000 | -0.115263000 |
| 8  | 0.386200000  | -3.429634000 | -0.755261000 |
| 8  | 0.206219000  | -1.333828000 | 2.992014000  |
| 7  | 0.010738000  | 0.163005000  | -1.853222000 |
| 6  | -1.198767000 | -0.239834000 | -2.610640000 |
| 1  | -1.091819000 | -1.299245000 | -2.863260000 |

|   |              |              |              |
|---|--------------|--------------|--------------|
| 1 | -1.266059000 | 0.321891000  | -3.553207000 |
| 6 | 1.249878000  | -0.056475000 | -2.641379000 |
| 1 | 1.187747000  | 0.468125000  | -3.605660000 |
| 1 | 1.326393000  | -1.128234000 | -2.850149000 |
| 6 | -3.287987000 | 0.275610000  | 1.029977000  |
| 1 | -2.735841000 | 1.217230000  | 1.071067000  |
| 6 | 3.569984000  | -1.716684000 | -0.066080000 |
| 1 | 4.559821000  | -1.276210000 | 0.100213000  |
| 6 | 2.461352000  | 0.433096000  | -1.848022000 |
| 1 | 2.416955000  | 1.522537000  | -1.756249000 |
| 1 | 3.395071000  | 0.189295000  | -2.360161000 |
| 6 | 3.288365000  | 1.051168000  | 0.875142000  |
| 1 | 2.595376000  | 1.896084000  | 0.850218000  |
| 6 | -2.451601000 | -0.012351000 | -1.766255000 |
| 1 | -3.344275000 | -0.386636000 | -2.273589000 |
| 1 | -2.594893000 | 1.060195000  | -1.615529000 |
| 6 | -2.606423000 | -3.348887000 | 1.017410000  |
| 1 | -1.587731000 | -3.699791000 | 0.838251000  |
| 1 | -3.258753000 | -4.228435000 | 1.074856000  |
| 1 | -2.621329000 | -2.858228000 | 1.992693000  |
| 6 | -2.969419000 | -3.156312000 | -1.476852000 |
| 1 | -3.402118000 | -2.582224000 | -2.300981000 |
| 1 | -3.511661000 | -4.107848000 | -1.422526000 |
| 1 | -1.929633000 | -3.386216000 | -1.723275000 |
| 6 | -3.084628000 | -2.430426000 | -0.124590000 |
| 1 | -4.143559000 | -2.197888000 | 0.042423000  |
| 6 | 0.282931000  | -2.313138000 | -0.403323000 |
| 6 | 0.163160000  | -1.071378000 | 1.851118000  |
| 6 | -3.357059000 | -0.268794000 | 2.466488000  |
| 1 | -3.969454000 | -1.174871000 | 2.525109000  |
| 1 | -3.822951000 | 0.481725000  | 3.115640000  |
| 1 | -2.366510000 | -0.493041000 | 2.871201000  |
| 6 | -4.698287000 | 0.542571000  | 0.478401000  |
| 1 | -4.684065000 | 1.004568000  | -0.513284000 |
| 1 | -5.227244000 | 1.227783000  | 1.151765000  |
| 1 | -5.294501000 | -0.374715000 | 0.414635000  |
| 6 | 4.638579000  | 1.486039000  | 0.280891000  |
| 1 | 5.377196000  | 0.676777000  | 0.296253000  |
| 1 | 5.047450000  | 2.308392000  | 0.880499000  |
| 1 | 4.551570000  | 1.844491000  | -0.749337000 |
| 6 | 3.633692000  | -2.520824000 | -1.376504000 |
| 1 | 2.666305000  | -2.961632000 | -1.629142000 |
| 1 | 4.348999000  | -3.343722000 | -1.259255000 |
| 1 | 3.970138000  | -1.915393000 | -2.222954000 |
| 6 | 3.253291000  | -2.643412000 | 1.123589000  |
| 1 | 3.146510000  | -2.100066000 | 2.065049000  |

|   |              |              |              |
|---|--------------|--------------|--------------|
| 1 | 4.063683000  | -3.372091000 | 1.245516000  |
| 1 | 2.327167000  | -3.197995000 | 0.955933000  |
| 6 | 3.440014000  | 0.650305000  | 2.351273000  |
| 1 | 2.492856000  | 0.316991000  | 2.783682000  |
| 1 | 3.785524000  | 1.515225000  | 2.929255000  |
| 1 | 4.181677000  | -0.146010000 | 2.479439000  |
| 1 | -0.038844000 | 1.173572000  | -1.642319000 |
| 1 | -0.172963000 | 1.044760000  | 0.622924000  |
| 7 | 0.220296000  | 2.916919000  | -0.625750000 |
| 1 | 1.172774000  | 3.261967000  | -0.695350000 |
| 6 | -0.786620000 | 3.907240000  | -1.054004000 |
| 1 | -1.013499000 | 3.769634000  | -2.117048000 |
| 6 | -0.356211000 | 5.355622000  | -0.798823000 |
| 1 | -0.176151000 | 5.521474000  | 0.268825000  |
| 1 | 0.564409000  | 5.587648000  | -1.345350000 |
| 1 | -1.134414000 | 6.050239000  | -1.133971000 |
| 6 | -1.982122000 | 3.477006000  | -0.187408000 |
| 1 | -2.610509000 | 4.319060000  | 0.114093000  |
| 1 | -2.609681000 | 2.736088000  | -0.693406000 |
| 6 | -0.047359000 | 2.550610000  | 0.757100000  |
| 8 | -1.401455000 | 2.908258000  | 0.993008000  |
| 8 | 0.769677000  | 2.730406000  | 1.680800000  |

-2062.151660

### 9 (Singlet)

|    |              |              |              |
|----|--------------|--------------|--------------|
| 25 | -0.626870000 | 0.698051000  | 0.075626000  |
| 15 | 1.386521000  | 1.847903000  | -0.001970000 |
| 15 | -2.264602000 | -0.951839000 | -0.072901000 |
| 8  | -2.076509000 | 2.713081000  | -1.455903000 |
| 8  | -1.625740000 | 1.940645000  | 2.557245000  |
| 7  | 0.197049000  | -0.310169000 | -1.598838000 |
| 6  | 1.056279000  | 0.570517000  | -2.433140000 |
| 1  | 0.427517000  | 1.350431000  | -2.873457000 |
| 1  | 1.501253000  | -0.005931000 | -3.255860000 |
| 6  | -0.809165000 | -1.043749000 | -2.413097000 |
| 1  | -0.301017000 | -1.635766000 | -3.186904000 |
| 1  | -1.443140000 | -0.308353000 | -2.918014000 |
| 6  | 2.618620000  | 1.358651000  | 1.322110000  |
| 1  | 2.571545000  | 0.263525000  | 1.268282000  |
| 6  | -4.031617000 | -0.472854000 | -0.475730000 |
| 1  | -4.630320000 | -1.372077000 | -0.288824000 |
| 6  | -1.629116000 | -1.957003000 | -1.500011000 |
| 1  | -0.974922000 | -2.714487000 | -1.050727000 |
| 1  | -2.422172000 | -2.467293000 | -2.052995000 |
| 6  | -2.338099000 | -2.206128000 | 1.308678000  |



|   |              |              |              |
|---|--------------|--------------|--------------|
| 1 | -1.294220000 | -2.553378000 | 1.337030000  |
| 6 | 2.158107000  | 1.171857000  | -1.558692000 |
| 1 | 2.743260000  | 1.915237000  | -2.104378000 |
| 1 | 2.845795000  | 0.378793000  | -1.252909000 |
| 6 | 0.456646000  | 4.348634000  | 0.895764000  |
| 1 | -0.580709000 | 4.145686000  | 0.613399000  |
| 1 | 0.594667000  | 5.435616000  | 0.906873000  |
| 1 | 0.601608000  | 3.982087000  | 1.914248000  |
| 6 | 1.138355000  | 4.233792000  | -1.534283000 |
| 1 | 1.874140000  | 3.894906000  | -2.267991000 |
| 1 | 1.162525000  | 5.329406000  | -1.529373000 |
| 1 | 0.144599000  | 3.928556000  | -1.873841000 |
| 6 | 1.433570000  | 3.718804000  | -0.114469000 |
| 1 | 2.456636000  | 4.009821000  | 0.152334000  |
| 6 | -1.500890000 | 1.903364000  | -0.837765000 |
| 6 | -1.220562000 | 1.433373000  | 1.588301000  |
| 6 | 2.176689000  | 1.773530000  | 2.734173000  |
| 1 | 2.257725000  | 2.855863000  | 2.878032000  |
| 1 | 2.829558000  | 1.296250000  | 3.473315000  |
| 1 | 1.148328000  | 1.472414000  | 2.949508000  |
| 6 | 4.063095000  | 1.800816000  | 1.038259000  |
| 1 | 4.417643000  | 1.479584000  | 0.054469000  |
| 1 | 4.730914000  | 1.362478000  | 1.788842000  |
| 1 | 4.169464000  | 2.889061000  | 1.101262000  |
| 6 | -3.216052000 | -3.426060000 | 0.981249000  |
| 1 | -4.281574000 | -3.171286000 | 0.952215000  |
| 1 | -3.082062000 | -4.184292000 | 1.761769000  |
| 1 | -2.945914000 | -3.887826000 | 0.026641000  |
| 6 | -4.218724000 | -0.074246000 | -1.950091000 |
| 1 | -3.615426000 | 0.798769000  | -2.212817000 |
| 1 | -5.269053000 | 0.188157000  | -2.121693000 |
| 1 | -3.968246000 | -0.886595000 | -2.637867000 |
| 6 | -4.520432000 | 0.648439000  | 0.458266000  |
| 1 | -4.404265000 | 0.396600000  | 1.514908000  |
| 1 | -5.583555000 | 0.842141000  | 0.274971000  |
| 1 | -3.973808000 | 1.577659000  | 0.274314000  |
| 6 | -2.709659000 | -1.604725000 | 2.672055000  |
| 1 | -2.099589000 | -0.732893000 | 2.921102000  |
| 1 | -2.550425000 | -2.357732000 | 3.452802000  |
| 1 | -3.763778000 | -1.309494000 | 2.717452000  |
| 1 | 0.843965000  | -1.053190000 | -1.228498000 |
| 1 | 1.280518000  | -1.710940000 | 1.113108000  |
| 7 | 1.947668000  | -2.467667000 | -0.755087000 |
| 1 | 1.642474000  | -3.293430000 | -1.269420000 |
| 6 | 3.424410000  | -2.388212000 | -0.759738000 |
| 1 | 3.756342000  | -1.420613000 | -1.158325000 |

|   |             |              |              |
|---|-------------|--------------|--------------|
| 6 | 4.061750000 | -3.499840000 | -1.596323000 |
| 1 | 3.830235000 | -4.481216000 | -1.166425000 |
| 1 | 3.689661000 | -3.477550000 | -2.627315000 |
| 1 | 5.150913000 | -3.384225000 | -1.628246000 |
| 6 | 3.784592000 | -2.487667000 | 0.748038000  |
| 1 | 4.720040000 | -3.031349000 | 0.917055000  |
| 1 | 3.890123000 | -1.481199000 | 1.186813000  |
| 6 | 1.462323000 | -2.723065000 | 0.656415000  |
| 8 | 2.717011000 | -3.198251000 | 1.342029000  |
| 8 | 0.471734000 | -3.554060000 | 0.742280000  |

-2062.154250

**9 (Triplet)**

|    |              |              |              |
|----|--------------|--------------|--------------|
| 25 | -1.055077000 | 0.769653000  | -0.229245000 |
| 15 | 0.908385000  | 2.058515000  | 0.068076000  |
| 15 | -1.949569000 | -1.431737000 | -0.013200000 |
| 8  | -2.959948000 | 2.496718000  | -1.889620000 |
| 8  | -2.579703000 | 1.960018000  | 2.036850000  |
| 7  | 0.183591000  | -0.157577000 | -1.636915000 |
| 6  | 0.832102000  | 0.876043000  | -2.484496000 |
| 1  | 0.043026000  | 1.447029000  | -2.981455000 |
| 1  | 1.446688000  | 0.399221000  | -3.259401000 |
| 6  | -0.561273000 | -1.185308000 | -2.412315000 |
| 1  | 0.102267000  | -1.642959000 | -3.158771000 |
| 1  | -1.373501000 | -0.682704000 | -2.946895000 |
| 6  | 2.161089000  | 1.340501000  | 1.254076000  |
| 1  | 2.387385000  | 0.386792000  | 0.766988000  |
| 6  | -3.775128000 | -1.676987000 | -0.342531000 |
| 1  | -3.930958000 | -2.762858000 | -0.348958000 |
| 6  | -1.089870000 | -2.255575000 | -1.448397000 |
| 1  | -0.248866000 | -2.819103000 | -1.021866000 |
| 1  | -1.751038000 | -2.956894000 | -1.965932000 |
| 6  | -1.488841000 | -2.483599000 | 1.459978000  |
| 1  | -0.413972000 | -2.635724000 | 1.293169000  |
| 6  | 1.704532000  | 1.795570000  | -1.610686000 |
| 1  | 1.869751000  | 2.754187000  | -2.108683000 |
| 1  | 2.685869000  | 1.341622000  | -1.452455000 |
| 6  | 0.462703000  | 4.310680000  | 1.714392000  |
| 1  | -0.524099000 | 3.907923000  | 1.965549000  |
| 1  | 0.406135000  | 5.402723000  | 1.785163000  |
| 1  | 1.174737000  | 3.968302000  | 2.468640000  |
| 6  | -0.062795000 | 4.551300000  | -0.745407000 |
| 1  | 0.173548000  | 4.262718000  | -1.774361000 |
| 1  | 0.012034000  | 5.642386000  | -0.681920000 |
| 1  | -1.102341000 | 4.273560000  | -0.546533000 |

|   |              |              |              |
|---|--------------|--------------|--------------|
| 6 | 0.878420000  | 3.911203000  | 0.289010000  |
| 1 | 1.903721000  | 4.255818000  | 0.101513000  |
| 6 | -2.219670000 | 1.812971000  | -1.318566000 |
| 6 | -1.979178000 | 1.483284000  | 1.156843000  |
| 6 | 1.546871000  | 1.003017000  | 2.620893000  |
| 1 | 1.266165000  | 1.897057000  | 3.184394000  |
| 1 | 2.274162000  | 0.443514000  | 3.219597000  |
| 1 | 0.655651000  | 0.381095000  | 2.501463000  |
| 6 | 3.458044000  | 2.153950000  | 1.368579000  |
| 1 | 3.902337000  | 2.368094000  | 0.390891000  |
| 1 | 4.194352000  | 1.587266000  | 1.949786000  |
| 1 | 3.293690000  | 3.106560000  | 1.881953000  |
| 6 | -2.152773000 | -3.869502000 | 1.448855000  |
| 1 | -3.231121000 | -3.809018000 | 1.633333000  |
| 1 | -1.715588000 | -4.486223000 | 2.242542000  |
| 1 | -1.992891000 | -4.392405000 | 0.500170000  |
| 6 | -4.175975000 | -1.125129000 | -1.720276000 |
| 1 | -4.040505000 | -0.041128000 | -1.767420000 |
| 1 | -5.236200000 | -1.335015000 | -1.901053000 |
| 1 | -3.607776000 | -1.577730000 | -2.538052000 |
| 6 | -4.637259000 | -1.050515000 | 0.764646000  |
| 1 | -4.447466000 | -1.495851000 | 1.744424000  |
| 1 | -5.698416000 | -1.199229000 | 0.534052000  |
| 1 | -4.457878000 | 0.027361000  | 0.838643000  |
| 6 | -1.689837000 | -1.761612000 | 2.801144000  |
| 1 | -1.219902000 | -0.774520000 | 2.804135000  |
| 1 | -1.235206000 | -2.354604000 | 3.603083000  |
| 1 | -2.747780000 | -1.630176000 | 3.048911000  |
| 1 | 0.971999000  | -0.671677000 | -1.175714000 |
| 1 | 1.889169000  | -1.758532000 | 1.239471000  |
| 7 | 2.512689000  | -1.733133000 | -0.787415000 |
| 1 | 2.430698000  | -2.438007000 | -1.521207000 |
| 6 | 3.914577000  | -1.261034000 | -0.723469000 |
| 1 | 3.947707000  | -0.164251000 | -0.704117000 |
| 6 | 4.742077000  | -1.744865000 | -1.914606000 |
| 1 | 4.812724000  | -2.838900000 | -1.912644000 |
| 1 | 4.287987000  | -1.428924000 | -2.861165000 |
| 1 | 5.756822000  | -1.333858000 | -1.872751000 |
| 6 | 4.417570000  | -1.817961000 | 0.641430000  |
| 1 | 5.459885000  | -2.150801000 | 0.596745000  |
| 1 | 4.336475000  | -1.043447000 | 1.423951000  |
| 6 | 2.202904000  | -2.512310000 | 0.473955000  |
| 8 | 3.583500000  | -2.921980000 | 0.927079000  |
| 8 | 1.391338000  | -3.509939000 | 0.303536000  |

-2062.140130

**TS4**

|    |              |              |              |
|----|--------------|--------------|--------------|
| 25 | 0.447565000  | -0.753337000 | 0.058866000  |
| 15 | -1.735759000 | -1.534946000 | -0.001783000 |
| 15 | 2.385394000  | 0.523350000  | -0.071689000 |
| 8  | 1.491986000  | -2.954272000 | -1.536031000 |
| 8  | 1.179454000  | -2.141624000 | 2.560933000  |
| 7  | -0.176995000 | 0.437710000  | -1.476683000 |
| 6  | -1.245167000 | -0.141737000 | -2.320055000 |
| 1  | -0.851922000 | -0.992743000 | -2.895657000 |
| 1  | -1.596684000 | 0.599823000  | -3.056218000 |
| 6  | 0.894158000  | 0.982576000  | -2.340065000 |
| 1  | 0.473414000  | 1.718648000  | -3.045995000 |
| 1  | 1.335654000  | 0.180799000  | -2.949773000 |
| 6  | -2.869745000 | -1.023239000 | 1.405783000  |
| 1  | -2.651668000 | 0.048626000  | 1.495461000  |
| 6  | 4.020785000  | -0.299113000 | -0.483615000 |
| 1  | 4.790675000  | 0.452987000  | -0.273090000 |
| 6  | 1.972858000  | 1.656245000  | -1.488061000 |
| 1  | 1.582618000  | 2.573577000  | -1.036943000 |
| 1  | 2.847177000  | 1.932207000  | -2.083065000 |
| 6  | 2.735867000  | 1.716288000  | 1.326343000  |
| 1  | 1.763673000  | 2.218420000  | 1.433387000  |
| 6  | -2.421088000 | -0.593320000 | -1.449733000 |
| 1  | -3.161152000 | -1.158082000 | -2.021409000 |
| 1  | -2.932739000 | 0.280626000  | -1.038166000 |
| 6  | -1.211900000 | -4.235537000 | 0.607410000  |
| 1  | -0.160063000 | -4.167437000 | 0.316849000  |
| 1  | -1.521436000 | -5.282291000 | 0.508644000  |
| 1  | -1.282201000 | -3.963435000 | 1.662668000  |
| 6  | -1.918106000 | -3.758577000 | -1.773796000 |
| 1  | -2.610028000 | -3.233759000 | -2.437601000 |
| 1  | -2.116613000 | -4.831709000 | -1.875857000 |
| 1  | -0.898770000 | -3.577337000 | -2.124700000 |
| 6  | -2.091038000 | -3.353062000 | -0.298630000 |
| 1  | -3.142105000 | -3.505163000 | -0.025019000 |
| 6  | 1.080657000  | -2.080265000 | -0.871042000 |
| 6  | 0.881676000  | -1.570780000 | 1.584338000  |
| 6  | -2.504599000 | -1.683616000 | 2.744673000  |
| 1  | -2.772422000 | -2.745205000 | 2.750895000  |
| 1  | -3.065485000 | -1.201392000 | 3.553121000  |
| 1  | -1.439913000 | -1.595172000 | 2.973312000  |
| 6  | -4.367388000 | -1.190915000 | 1.099515000  |
| 1  | -4.669376000 | -0.690190000 | 0.174968000  |
| 1  | -4.956753000 | -0.759439000 | 1.916894000  |
| 1  | -4.643846000 | -2.247521000 | 1.019265000  |

|   |              |              |              |
|---|--------------|--------------|--------------|
| 6 | 3.791659000  | 2.781654000  | 0.983811000  |
| 1 | 4.793618000  | 2.348077000  | 0.886749000  |
| 1 | 3.832832000  | 3.520539000  | 1.792952000  |
| 1 | 3.563132000  | 3.321429000  | 0.059870000  |
| 6 | 4.135626000  | -0.696403000 | -1.966126000 |
| 1 | 3.369553000  | -1.422772000 | -2.249949000 |
| 1 | 5.112738000  | -1.162577000 | -2.139001000 |
| 1 | 4.060257000  | 0.163666000  | -2.637026000 |
| 6 | 4.260779000  | -1.518748000 | 0.424930000  |
| 1 | 4.165297000  | -1.278705000 | 1.486146000  |
| 1 | 5.271591000  | -1.908592000 | 0.257787000  |
| 1 | 3.550824000  | -2.319407000 | 0.200218000  |
| 6 | 3.073084000  | 1.024805000  | 2.656982000  |
| 1 | 2.353992000  | 0.244044000  | 2.916216000  |
| 1 | 3.063239000  | 1.769279000  | 3.461683000  |
| 1 | 4.073329000  | 0.578329000  | 2.641007000  |
| 1 | -0.733100000 | 1.619644000  | -0.961632000 |
| 1 | -1.166767000 | 1.704781000  | 1.302179000  |
| 7 | -1.159985000 | 2.712010000  | -0.594995000 |
| 1 | -0.507885000 | 3.433820000  | -0.901800000 |
| 6 | -2.549709000 | 3.049552000  | -1.009019000 |
| 1 | -2.913557000 | 2.306670000  | -1.725043000 |
| 6 | -2.630556000 | 4.443168000  | -1.630219000 |
| 1 | -2.319323000 | 5.202416000  | -0.905239000 |
| 1 | -1.986795000 | 4.516770000  | -2.513530000 |
| 1 | -3.657804000 | 4.659146000  | -1.940510000 |
| 6 | -3.303878000 | 2.948691000  | 0.336174000  |
| 1 | -4.190538000 | 3.587070000  | 0.368231000  |
| 1 | -3.616088000 | 1.910304000  | 0.530692000  |
| 6 | -1.070313000 | 2.775171000  | 0.996484000  |
| 8 | -2.373844000 | 3.396574000  | 1.304915000  |
| 8 | -0.047014000 | 3.413511000  | 1.425645000  |

-2062.145129

### 10 (Singlet)

|    |              |              |              |
|----|--------------|--------------|--------------|
| 25 | 0.150076000  | -0.720492000 | -0.089071000 |
| 15 | 2.422029000  | -0.392789000 | 0.078111000  |
| 15 | -2.088834000 | -1.103463000 | 0.292002000  |
| 8  | 0.456681000  | -3.186069000 | -1.661973000 |
| 8  | -0.196201000 | 0.897014000  | -2.505090000 |
| 7  | 0.145631000  | -0.146538000 | 1.729656000  |
| 6  | 1.339000000  | 0.160563000  | 2.540127000  |
| 1  | 1.586621000  | -0.702711000 | 3.177501000  |
| 1  | 1.121765000  | 0.988054000  | 3.234568000  |
| 6  | -1.022163000 | -0.140484000 | 2.630066000  |

|   |              |              |              |
|---|--------------|--------------|--------------|
| 1 | -0.996039000 | 0.751844000  | 3.276397000  |
| 1 | -0.965759000 | -1.000453000 | 3.316023000  |
| 6 | 3.321382000  | 0.733306000  | -1.121196000 |
| 1 | 2.741126000  | 1.660132000  | -1.013890000 |
| 6 | -2.620291000 | -2.850602000 | 0.740513000  |
| 1 | -3.576146000 | -2.738697000 | 1.268120000  |
| 6 | -2.341299000 | -0.152937000 | 1.858517000  |
| 1 | -2.597203000 | 0.868750000  | 1.557596000  |
| 1 | -3.165212000 | -0.545488000 | 2.462911000  |
| 6 | -3.427662000 | -0.409934000 | -0.823316000 |
| 1 | -3.234443000 | 0.668324000  | -0.766522000 |
| 6 | 2.533479000  | 0.548086000  | 1.669109000  |
| 1 | 3.486371000  | 0.386771000  | 2.182881000  |
| 1 | 2.468794000  | 1.609603000  | 1.406795000  |
| 6 | 3.885890000  | -2.656538000 | -0.895534000 |
| 1 | 2.989335000  | -2.986424000 | -1.427294000 |
| 1 | 4.461408000  | -3.550379000 | -0.627528000 |
| 1 | 4.497575000  | -2.070216000 | -1.583896000 |
| 6 | 2.890272000  | -2.803071000 | 1.425859000  |
| 1 | 2.740300000  | -2.306734000 | 2.387971000  |
| 1 | 3.535132000  | -3.672322000 | 1.598200000  |
| 1 | 1.916972000  | -3.163863000 | 1.078320000  |
| 6 | 3.536969000  | -1.874795000 | 0.381640000  |
| 1 | 4.463532000  | -1.466108000 | 0.805477000  |
| 6 | 0.330819000  | -2.193530000 | -1.048261000 |
| 6 | -0.054475000 | 0.210523000  | -1.559809000 |
| 6 | 3.221727000  | 0.298432000  | -2.594004000 |
| 1 | 3.885048000  | -0.541100000 | -2.814126000 |
| 1 | 3.524815000  | 1.131477000  | -3.238551000 |
| 1 | 2.206826000  | 0.011419000  | -2.873843000 |
| 6 | 4.777177000  | 1.025265000  | -0.722154000 |
| 1 | 4.862299000  | 1.386844000  | 0.307217000  |
| 1 | 5.195186000  | 1.794824000  | -1.381669000 |
| 1 | 5.402758000  | 0.131924000  | -0.822178000 |
| 6 | -4.853351000 | -0.652078000 | -0.298965000 |
| 1 | -5.126602000 | -1.711311000 | -0.344518000 |
| 1 | -5.570338000 | -0.099808000 | -0.917489000 |
| 1 | -4.977397000 | -0.312685000 | 0.734241000  |
| 6 | -1.602868000 | -3.485932000 | 1.704689000  |
| 1 | -0.616345000 | -3.563136000 | 1.237378000  |
| 1 | -1.931747000 | -4.496304000 | 1.973976000  |
| 1 | -1.492370000 | -2.916360000 | 2.630515000  |
| 6 | -2.839580000 | -3.758271000 | -0.481662000 |
| 1 | -3.680963000 | -3.431468000 | -1.095716000 |
| 1 | -3.060675000 | -4.776723000 | -0.141000000 |
| 1 | -1.950275000 | -3.806583000 | -1.115958000 |

|   |              |              |              |
|---|--------------|--------------|--------------|
| 6 | -3.290872000 | -0.816809000 | -2.300877000 |
| 1 | -2.276334000 | -0.668949000 | -2.676152000 |
| 1 | -3.965297000 | -0.200637000 | -2.906902000 |
| 1 | -3.565405000 | -1.861580000 | -2.465865000 |
| 1 | -0.108979000 | 2.035840000  | 1.357797000  |
| 1 | -1.556587000 | 2.152767000  | -0.633032000 |
| 7 | -0.396856000 | 2.995378000  | 1.561941000  |
| 1 | -0.352857000 | 3.120992000  | 2.569049000  |
| 6 | 0.453063000  | 3.977672000  | 0.881356000  |
| 1 | 1.530119000  | 3.801924000  | 1.057098000  |
| 6 | 0.109608000  | 5.388745000  | 1.363875000  |
| 1 | -0.942188000 | 5.615460000  | 1.162716000  |
| 1 | 0.281962000  | 5.477129000  | 2.442422000  |
| 1 | 0.732464000  | 6.134600000  | 0.858894000  |
| 6 | 0.268328000  | 3.827632000  | -0.631211000 |
| 1 | 0.884343000  | 4.548247000  | -1.171854000 |
| 1 | 0.538684000  | 2.819955000  | -0.960526000 |
| 6 | -1.989539000 | 3.124531000  | -0.900386000 |
| 8 | -1.096053000 | 4.114086000  | -1.034637000 |
| 8 | -3.175577000 | 3.301059000  | -1.096036000 |

-2062.171121

### 10 (Triplet)

|    |              |              |              |
|----|--------------|--------------|--------------|
| 25 | 0.079889000  | -0.842584000 | -0.137896000 |
| 15 | 2.432303000  | -0.646335000 | -0.049694000 |
| 15 | -2.260973000 | -0.921951000 | 0.149958000  |
| 8  | 0.207184000  | -3.842027000 | -0.407178000 |
| 8  | -0.063139000 | 0.974723000  | -2.523388000 |
| 7  | 0.115235000  | -0.020203000 | 1.667985000  |
| 6  | 1.343157000  | -0.034356000 | 2.449846000  |
| 1  | 1.493110000  | -1.005103000 | 2.955276000  |
| 1  | 1.298764000  | 0.721909000  | 3.255148000  |
| 6  | -1.067214000 | -0.039552000 | 2.516105000  |
| 1  | -1.027687000 | 0.780491000  | 3.257072000  |
| 1  | -1.123203000 | -0.970279000 | 3.107316000  |
| 6  | 3.299451000  | 0.491789000  | -1.261475000 |
| 1  | 2.679508000  | 1.394265000  | -1.181868000 |
| 6  | -3.156695000 | -2.496899000 | 0.639932000  |
| 1  | -4.156688000 | -2.162594000 | 0.944216000  |
| 6  | -2.343335000 | 0.134466000  | 1.680625000  |
| 1  | -2.411136000 | 1.171924000  | 1.337256000  |
| 1  | -3.243771000 | -0.087558000 | 2.263316000  |
| 6  | -3.381533000 | -0.035686000 | -1.062493000 |
| 1  | -2.974211000 | 0.981004000  | -1.044160000 |
| 6  | 2.547842000  | 0.290241000  | 1.557011000  |

|   |              |              |              |
|---|--------------|--------------|--------------|
| 1 | 3.499611000  | 0.092003000  | 2.060576000  |
| 1 | 2.526506000  | 1.352022000  | 1.291386000  |
| 6 | 3.605014000  | -3.059952000 | -1.016701000 |
| 1 | 2.619146000  | -3.471908000 | -1.245756000 |
| 1 | 4.275431000  | -3.900375000 | -0.802413000 |
| 1 | 3.981493000  | -2.560468000 | -1.911011000 |
| 6 | 3.172482000  | -2.901747000 | 1.477230000  |
| 1 | 3.292573000  | -2.299948000 | 2.381743000  |
| 1 | 3.822748000  | -3.778216000 | 1.576185000  |
| 1 | 2.138482000  | -3.254531000 | 1.436854000  |
| 6 | 3.557504000  | -2.125301000 | 0.204495000  |
| 1 | 4.556760000  | -1.698388000 | 0.357246000  |
| 6 | 0.164205000  | -2.674924000 | -0.340471000 |
| 6 | -0.014879000 | 0.220030000  | -1.627693000 |
| 6 | 3.236832000  | 0.011994000  | -2.722297000 |
| 1 | 3.981152000  | -0.764797000 | -2.917768000 |
| 1 | 3.458694000  | 0.851765000  | -3.390305000 |
| 1 | 2.253332000  | -0.380774000 | -2.991119000 |
| 6 | 4.737627000  | 0.857756000  | -0.859953000 |
| 1 | 4.803797000  | 1.232712000  | 0.165655000  |
| 1 | 5.114667000  | 1.641677000  | -1.526827000 |
| 1 | 5.408858000  | -0.002239000 | -0.954794000 |
| 6 | -4.849446000 | 0.042717000  | -0.612748000 |
| 1 | -5.335772000 | -0.937593000 | -0.656437000 |
| 1 | -5.399122000 | 0.712740000  | -1.283630000 |
| 1 | -4.953296000 | 0.434019000  | 0.404193000  |
| 6 | -2.499240000 | -3.170473000 | 1.857735000  |
| 1 | -1.457525000 | -3.439362000 | 1.663116000  |
| 1 | -3.044298000 | -4.090764000 | 2.097199000  |
| 1 | -2.527871000 | -2.532577000 | 2.744573000  |
| 6 | -3.308876000 | -3.484483000 | -0.529282000 |
| 1 | -3.924421000 | -3.078538000 | -1.334514000 |
| 1 | -3.798852000 | -4.397381000 | -0.171103000 |
| 1 | -2.340301000 | -3.769747000 | -0.948307000 |
| 6 | -3.263011000 | -0.551860000 | -2.507422000 |
| 1 | -2.223364000 | -0.696969000 | -2.810051000 |
| 1 | -3.714944000 | 0.177888000  | -3.188743000 |
| 1 | -3.791606000 | -1.498745000 | -2.644547000 |
| 1 | 0.079756000  | 2.057772000  | 1.500873000  |
| 1 | -1.278298000 | 2.303370000  | -0.521907000 |
| 7 | -0.106783000 | 3.050316000  | 1.693643000  |
| 1 | -0.065560000 | 3.179525000  | 2.700432000  |
| 6 | 0.844590000  | 3.939515000  | 1.022138000  |
| 1 | 1.897303000  | 3.655209000  | 1.204835000  |
| 6 | 0.645728000  | 5.379732000  | 1.501901000  |
| 1 | -0.375166000 | 5.713164000  | 1.291557000  |



|   |              |             |              |
|---|--------------|-------------|--------------|
| 1 | 0.816106000  | 5.450305000 | 2.581774000  |
| 1 | 1.346214000  | 6.057769000 | 1.003236000  |
| 6 | 0.658062000  | 3.813488000 | -0.493097000 |
| 1 | 1.341709000  | 4.473996000 | -1.028724000 |
| 1 | 0.829788000  | 2.785140000 | -0.825412000 |
| 6 | -1.640017000 | 3.307700000 | -0.775155000 |
| 8 | -0.672136000 | 4.224250000 | -0.901690000 |
| 8 | -2.809938000 | 3.574444000 | -0.965119000 |

-2062.137400

**11**

|   |              |              |              |
|---|--------------|--------------|--------------|
| 1 | -1.032846000 | 1.983562000  | -0.922523000 |
| 1 | 1.556181000  | 0.989139000  | -0.870942000 |
| 7 | -1.036794000 | 1.449368000  | -0.056301000 |
| 1 | -1.694259000 | 1.909525000  | 0.568026000  |
| 6 | -1.443599000 | 0.056535000  | -0.299587000 |
| 1 | -2.308251000 | -0.014456000 | -0.981282000 |
| 6 | -1.812982000 | -0.616374000 | 1.024128000  |
| 1 | -0.972333000 | -0.576819000 | 1.722935000  |
| 1 | -2.670541000 | -0.113248000 | 1.483263000  |
| 1 | -2.082236000 | -1.664826000 | 0.862571000  |
| 6 | -0.302708000 | -0.675160000 | -1.012704000 |
| 1 | -0.593427000 | -1.696962000 | -1.262198000 |
| 1 | -0.020697000 | -0.155900000 | -1.936336000 |
| 6 | 1.729735000  | 0.207998000  | -0.116630000 |
| 8 | 0.858602000  | -0.809356000 | -0.156259000 |
| 8 | 2.648060000  | 0.228907000  | 0.676178000  |

-362.987243

**12 (Singlet)**

|    |              |              |              |
|----|--------------|--------------|--------------|
| 25 | 0.000011000  | 0.142833000  | -0.214277000 |
| 15 | -2.262859000 | -0.139119000 | -0.242054000 |
| 15 | 2.262914000  | -0.138700000 | -0.242353000 |
| 8  | -0.000071000 | 1.183490000  | 2.543048000  |
| 8  | -0.000430000 | 2.778429000  | -1.480337000 |
| 7  | 0.000117000  | -1.364924000 | -1.369939000 |
| 6  | -1.190293000 | -2.071857000 | -1.874499000 |
| 1  | -1.286934000 | -3.044533000 | -1.363697000 |
| 1  | -1.060339000 | -2.311555000 | -2.942475000 |
| 6  | 1.190622000  | -2.071064000 | -1.875384000 |
| 1  | 1.060331000  | -2.310109000 | -2.943467000 |
| 1  | 1.287837000  | -3.044034000 | -1.365260000 |
| 6  | -3.392754000 | 1.301426000  | -0.637533000 |
| 1  | -3.036670000 | 1.582920000  | -1.638275000 |

|   |              |              |              |
|---|--------------|--------------|--------------|
| 6 | 3.070939000  | -1.093552000 | 1.159667000  |
| 1 | 4.044256000  | -1.423741000 | 0.773434000  |
| 6 | 2.475050000  | -1.253478000 | -1.704448000 |
| 1 | 2.615593000  | -0.596819000 | -2.569990000 |
| 1 | 3.359628000  | -1.893423000 | -1.621316000 |
| 6 | 3.392942000  | 1.302006000  | -0.636919000 |
| 1 | 3.037610000  | 1.583704000  | -1.637849000 |
| 6 | -2.474950000 | -1.254639000 | -1.703605000 |
| 1 | -3.359303000 | -1.894836000 | -1.619977000 |
| 1 | -2.615919000 | -0.598426000 | -2.569420000 |
| 6 | -3.304412000 | -0.248054000 | 2.423517000  |
| 1 | -2.374917000 | 0.199511000  | 2.787083000  |
| 1 | -3.701085000 | -0.887845000 | 3.220852000  |
| 1 | -4.028281000 | 0.553315000  | 2.259541000  |
| 6 | -2.227401000 | -2.335947000 | 1.495839000  |
| 1 | -2.108833000 | -3.002787000 | 0.637940000  |
| 1 | -2.709696000 | -2.906328000 | 2.298107000  |
| 1 | -1.228125000 | -2.045040000 | 1.836423000  |
| 6 | -3.070837000 | -1.093318000 | 1.160414000  |
| 1 | -4.043832000 | -1.424353000 | 0.774115000  |
| 6 | 0.000003000  | 0.778061000  | 1.439302000  |
| 6 | -0.000250000 | 1.746866000  | -0.915481000 |
| 6 | -3.176266000 | 2.518269000  | 0.278779000  |
| 1 | -3.575707000 | 2.350977000  | 1.282251000  |
| 1 | -3.695776000 | 3.387637000  | -0.140776000 |
| 1 | -2.117376000 | 2.770414000  | 0.373915000  |
| 6 | -4.878332000 | 0.920325000  | -0.742315000 |
| 1 | -5.042099000 | 0.083700000  | -1.429476000 |
| 1 | -5.456871000 | 1.774738000  | -1.112990000 |
| 1 | -5.290346000 | 0.643363000  | 0.233815000  |
| 6 | 4.878599000  | 0.921026000  | -0.740721000 |
| 1 | 5.290133000  | 0.644458000  | 0.235698000  |
| 1 | 5.457234000  | 1.775385000  | -1.111366000 |
| 1 | 5.042848000  | 0.084177000  | -1.427491000 |
| 6 | 2.228144000  | -2.336966000 | 1.493848000  |
| 1 | 1.228249000  | -2.047080000 | 1.833508000  |
| 1 | 2.710120000  | -2.907238000 | 2.296392000  |
| 1 | 2.111054000  | -3.003591000 | 0.635577000  |
| 6 | 3.303673000  | -0.249086000 | 2.423473000  |
| 1 | 4.027369000  | 0.552632000  | 2.260376000  |
| 1 | 3.700218000  | -0.889312000 | 3.220519000  |
| 1 | 2.373894000  | 0.197945000  | 2.786968000  |
| 6 | 3.175711000  | 2.518623000  | 0.279497000  |
| 1 | 2.116860000  | 2.772215000  | 0.371776000  |
| 1 | 3.697715000  | 3.387504000  | -0.138169000 |
| 1 | 3.572105000  | 2.350176000  | 1.284050000  |

-1699.196572

**12 (Triplet)**

|    |              |              |              |
|----|--------------|--------------|--------------|
| 25 | -0.011983000 | 0.518847000  | -0.479789000 |
| 15 | -2.203965000 | -0.232833000 | -0.177675000 |
| 15 | 2.209617000  | -0.100166000 | -0.089392000 |
| 8  | -0.118613000 | 2.169938000  | 2.001152000  |
| 8  | -0.046971000 | 3.219049000  | -1.879665000 |
| 7  | 0.063956000  | -1.013745000 | -1.741595000 |
| 6  | -1.070254000 | -1.823063000 | -2.155594000 |
| 1  | -0.996613000 | -2.843900000 | -1.728993000 |
| 1  | -1.072384000 | -1.971903000 | -3.253851000 |
| 6  | 1.297147000  | -1.612018000 | -2.227861000 |
| 1  | 1.311558000  | -1.659284000 | -3.335480000 |
| 1  | 1.375215000  | -2.664628000 | -1.893024000 |
| 6  | -3.609830000 | 1.013705000  | -0.280062000 |
| 1  | -3.529209000 | 1.350427000  | -1.322500000 |
| 6  | 2.639509000  | -1.356502000 | 1.237779000  |
| 1  | 3.716380000  | -1.258846000 | 1.423312000  |
| 6  | 2.538968000  | -0.843141000 | -1.756723000 |
| 1  | 2.721881000  | 0.018845000  | -2.408941000 |
| 1  | 3.437883000  | -1.467333000 | -1.774386000 |
| 6  | 3.528706000  | 1.227609000  | 0.045498000  |
| 1  | 3.206151000  | 1.950489000  | -0.715890000 |
| 6  | -2.411752000 | -1.195575000 | -1.751428000 |
| 1  | -3.206616000 | -1.945680000 | -1.672914000 |
| 1  | -2.721016000 | -0.461774000 | -2.503644000 |
| 6  | -2.573799000 | -0.715113000 | 2.572785000  |
| 1  | -1.571331000 | -0.310223000 | 2.747123000  |
| 1  | -2.791213000 | -1.435123000 | 3.370243000  |
| 1  | -3.289688000 | 0.105705000  | 2.665618000  |
| 6  | -1.761860000 | -2.660914000 | 1.173918000  |
| 1  | -1.878073000 | -3.230686000 | 0.248215000  |
| 1  | -2.022451000 | -3.321677000 | 2.008846000  |
| 1  | -0.707922000 | -2.389007000 | 1.273767000  |
| 6  | -2.656276000 | -1.412392000 | 1.204976000  |
| 1  | -3.691691000 | -1.725092000 | 1.022087000  |
| 6  | -0.078685000 | 1.523032000  | 1.022464000  |
| 6  | -0.035857000 | 2.156673000  | -1.403711000 |
| 6  | -3.393282000 | 2.249225000  | 0.608532000  |
| 1  | -3.416468000 | 2.001289000  | 1.673652000  |
| 1  | -4.189912000 | 2.979033000  | 0.421476000  |
| 1  | -2.435234000 | 2.729391000  | 0.395804000  |
| 6  | -5.006590000 | 0.404729000  | -0.078357000 |
| 1  | -5.171699000 | -0.473308000 | -0.711425000 |

|   |              |              |              |
|---|--------------|--------------|--------------|
| 1 | -5.774189000 | 1.146166000  | -0.329047000 |
| 1 | -5.165704000 | 0.108377000  | 0.964033000  |
| 6 | 4.948018000  | 0.749221000  | -0.303475000 |
| 1 | 5.306643000  | -0.002872000 | 0.408410000  |
| 1 | 5.642545000  | 1.596785000  | -0.259756000 |
| 1 | 5.009316000  | 0.323291000  | -1.308826000 |
| 6 | 2.353446000  | -2.799105000 | 0.790839000  |
| 1 | 1.305143000  | -2.927535000 | 0.504808000  |
| 1 | 2.562620000  | -3.487305000 | 1.617984000  |
| 1 | 2.974815000  | -3.098691000 | -0.057647000 |
| 6 | 1.878828000  | -1.024536000 | 2.534345000  |
| 1 | 2.092059000  | -0.017145000 | 2.900602000  |
| 1 | 2.155137000  | -1.736179000 | 3.321174000  |
| 1 | 0.798476000  | -1.090970000 | 2.373695000  |
| 6 | 3.506895000  | 1.930614000  | 1.412346000  |
| 1 | 2.505461000  | 2.271047000  | 1.686994000  |
| 1 | 4.167616000  | 2.804813000  | 1.388052000  |
| 1 | 3.874308000  | 1.266941000  | 2.202794000  |

-1699.161504

**13**

|    |              |              |              |
|----|--------------|--------------|--------------|
| 25 | -0.000006000 | 0.125480000  | -0.016346000 |
| 15 | -2.286408000 | 0.045616000  | -0.341270000 |
| 15 | 2.286411000  | 0.045515000  | -0.341132000 |
| 8  | 0.000130000  | -2.120227000 | 1.863752000  |
| 8  | -0.000057000 | 2.036802000  | 2.230165000  |
| 7  | 0.000081000  | -1.181440000 | -1.665471000 |
| 6  | -1.194056000 | -2.002267000 | -1.786398000 |
| 1  | -1.284172000 | -2.754504000 | -0.972529000 |
| 1  | -1.172369000 | -2.582700000 | -2.727942000 |
| 6  | 1.193987000  | -2.002690000 | -1.785829000 |
| 1  | 1.172404000  | -2.583347000 | -2.727236000 |
| 1  | 1.283636000  | -2.754759000 | -0.971750000 |
| 6  | -3.102165000 | 1.612445000  | -0.985012000 |
| 1  | -2.465399000 | 1.852186000  | -1.847504000 |
| 6  | 3.431662000  | -0.591310000 | 1.005355000  |
| 1  | 4.441038000  | -0.271008000 | 0.720760000  |
| 6  | 2.440324000  | -1.111875000 | -1.786782000 |
| 1  | 2.434324000  | -0.487293000 | -2.687428000 |
| 1  | 3.373428000  | -1.682798000 | -1.778354000 |
| 6  | 3.102146000  | 1.612039000  | -0.985605000 |
| 1  | 2.465144000  | 1.851681000  | -1.847947000 |
| 6  | -2.440127000 | -1.111072000 | -1.787492000 |
| 1  | -3.373405000 | -1.681730000 | -1.779667000 |
| 1  | -2.433604000 | -0.486113000 | -2.687875000 |

|   |              |              |              |
|---|--------------|--------------|--------------|
| 6 | -3.081294000 | 0.037974000  | 2.364828000  |
| 1 | -2.100032000 | -0.300590000 | 2.710617000  |
| 1 | -3.824784000 | -0.262543000 | 3.112491000  |
| 1 | -3.060985000 | 1.129918000  | 2.332699000  |
| 6 | -3.435763000 | -2.128010000 | 1.111046000  |
| 1 | -3.763108000 | -2.610644000 | 0.186662000  |
| 1 | -4.128776000 | -2.430687000 | 1.905069000  |
| 1 | -2.447574000 | -2.517637000 | 1.368124000  |
| 6 | -3.431796000 | -0.592254000 | 1.004593000  |
| 1 | -4.441252000 | -0.272579000 | 0.719581000  |
| 6 | 0.000031000  | -1.217358000 | 1.119501000  |
| 6 | -0.000032000 | 1.305352000  | 1.313169000  |
| 6 | -3.023805000 | 2.788614000  | 0.000947000  |
| 1 | -3.693565000 | 2.637990000  | 0.853977000  |
| 1 | -3.338149000 | 3.711767000  | -0.499788000 |
| 1 | -2.011180000 | 2.938958000  | 0.384632000  |
| 6 | -4.540046000 | 1.412022000  | -1.492381000 |
| 1 | -4.620278000 | 0.584959000  | -2.204324000 |
| 1 | -4.882664000 | 2.322610000  | -1.998213000 |
| 1 | -5.232851000 | 1.219064000  | -0.666204000 |
| 6 | 4.539834000  | 1.411274000  | -1.493394000 |
| 1 | 5.232837000  | 1.217999000  | -0.667455000 |
| 1 | 4.882564000  | 2.321833000  | -1.999205000 |
| 1 | 4.619628000  | 0.584292000  | -2.205483000 |
| 6 | 3.436584000  | -2.127035000 | 1.112181000  |
| 1 | 2.448377000  | -2.517276000 | 1.368280000  |
| 1 | 4.128941000  | -2.429053000 | 1.907026000  |
| 1 | 3.765274000  | -2.609655000 | 0.188265000  |
| 6 | 3.080116000  | 0.039001000  | 2.365292000  |
| 1 | 3.058539000  | 1.130911000  | 2.332807000  |
| 1 | 3.823759000  | -0.260421000 | 3.113239000  |
| 1 | 2.099158000  | -0.300563000 | 2.710950000  |
| 6 | 3.024278000  | 2.788370000  | 0.000193000  |
| 1 | 2.011785000  | 2.938923000  | 0.384165000  |
| 1 | 3.338623000  | 3.711404000  | -0.500758000 |
| 1 | 3.694275000  | 2.637732000  | 0.853039000  |
| 1 | 0.000050000  | 1.640145000  | -1.039181000 |
| 1 | 0.000030000  | 1.057726000  | -1.557160000 |

-1700.344373

### TS5

|    |              |              |              |
|----|--------------|--------------|--------------|
| 25 | -0.000002000 | 0.091925000  | -0.001352000 |
| 15 | -2.285384000 | 0.041075000  | -0.322740000 |
| 15 | 2.285382000  | 0.041078000  | -0.322740000 |
| 8  | -0.000002000 | -2.011111000 | 2.051630000  |

|   |              |              |              |
|---|--------------|--------------|--------------|
| 8 | 0.000003000  | 2.233726000  | 2.017705000  |
| 7 | -0.000003000 | -1.215155000 | -1.690425000 |
| 6 | -1.209947000 | -2.010325000 | -1.809315000 |
| 1 | -1.283778000 | -2.754564000 | -0.991388000 |
| 1 | -1.204375000 | -2.584292000 | -2.753436000 |
| 6 | 1.209945000  | -2.010319000 | -1.809322000 |
| 1 | 1.204373000  | -2.584284000 | -2.753444000 |
| 1 | 1.283784000  | -2.754559000 | -0.991397000 |
| 6 | -3.100203000 | 1.605104000  | -0.975634000 |
| 1 | -2.450214000 | 1.843842000  | -1.828367000 |
| 6 | 3.442348000  | -0.610714000 | 1.004664000  |
| 1 | 4.454041000  | -0.320637000 | 0.696659000  |
| 6 | 2.443268000  | -1.102817000 | -1.785617000 |
| 1 | 2.442746000  | -0.469506000 | -2.680175000 |
| 1 | 3.377129000  | -1.671948000 | -1.781130000 |
| 6 | 3.100205000  | 1.605109000  | -0.975621000 |
| 1 | 2.450205000  | 1.843870000  | -1.828337000 |
| 6 | -2.443275000 | -1.102831000 | -1.785608000 |
| 1 | -3.377133000 | -1.671967000 | -1.781109000 |
| 1 | -2.442765000 | -0.469526000 | -2.680171000 |
| 6 | -3.133246000 | 0.042941000  | 2.364170000  |
| 1 | -2.143401000 | -0.252996000 | 2.724088000  |
| 1 | -3.872950000 | -0.281395000 | 3.105632000  |
| 1 | -3.158508000 | 1.134507000  | 2.322755000  |
| 6 | -3.405008000 | -2.144803000 | 1.123923000  |
| 1 | -3.700289000 | -2.643344000 | 0.196917000  |
| 1 | -4.104656000 | -2.461950000 | 1.906333000  |
| 1 | -2.411388000 | -2.503967000 | 1.403666000  |
| 6 | -3.442350000 | -0.610704000 | 1.004671000  |
| 1 | -4.454044000 | -0.320629000 | 0.696666000  |
| 6 | -0.000002000 | -1.164150000 | 1.241810000  |
| 6 | 0.000001000  | 1.392500000  | 1.200524000  |
| 6 | -3.042007000 | 2.787892000  | 0.003416000  |
| 1 | -3.721310000 | 2.639413000  | 0.849243000  |
| 1 | -3.358743000 | 3.703899000  | -0.509098000 |
| 1 | -2.035788000 | 2.950351000  | 0.396011000  |
| 6 | -4.532005000 | 1.398004000  | -1.498336000 |
| 1 | -4.604541000 | 0.570363000  | -2.210329000 |
| 1 | -4.871772000 | 2.307120000  | -2.008761000 |
| 1 | -5.232880000 | 1.204760000  | -0.678972000 |
| 6 | 4.531996000  | 1.398005000  | -1.498349000 |
| 1 | 5.232879000  | 1.204722000  | -0.679004000 |
| 1 | 4.871769000  | 2.307133000  | -2.008748000 |
| 1 | 4.604508000  | 0.570389000  | -2.210373000 |
| 6 | 3.405005000  | -2.144814000 | 1.123904000  |
| 1 | 2.411387000  | -2.503978000 | 1.403650000  |

|   |              |              |              |
|---|--------------|--------------|--------------|
| 1 | 4.104658000  | -2.461968000 | 1.906307000  |
| 1 | 3.700279000  | -2.643347000 | 0.196892000  |
| 6 | 3.133248000  | 0.042919000  | 2.364170000  |
| 1 | 3.158507000  | 1.134486000  | 2.322764000  |
| 1 | 3.872955000  | -0.281421000 | 3.105626000  |
| 1 | 2.143406000  | -0.253024000 | 2.724088000  |
| 6 | 3.042037000  | 2.787879000  | 0.003451000  |
| 1 | 2.035828000  | 2.950333000  | 0.396074000  |
| 1 | 3.358763000  | 3.703894000  | -0.509054000 |
| 1 | 3.721359000  | 2.639384000  | 0.849259000  |
| 1 | -0.000007000 | 1.142518000  | -1.382040000 |
| 1 | -0.000006000 | 0.279778000  | -1.724408000 |

-1700.338906

**14**

|    |              |              |              |
|----|--------------|--------------|--------------|
| 25 | 0.829957000  | 0.660049000  | 0.087494000  |
| 15 | 2.156354000  | -1.192903000 | -0.008312000 |
| 15 | -1.030283000 | 1.960164000  | 0.010630000  |
| 8  | 2.608793000  | 2.481001000  | -1.404212000 |
| 8  | 1.832877000  | 1.658804000  | 2.654146000  |
| 7  | -0.101780000 | -0.272415000 | -1.645929000 |
| 6  | 0.853596000  | -1.073650000 | -2.443083000 |
| 1  | 1.589793000  | -0.385088000 | -2.869479000 |
| 1  | 0.337590000  | -1.580343000 | -3.272217000 |
| 6  | -0.885739000 | 0.692303000  | -2.447267000 |
| 1  | -1.387444000 | 0.187776000  | -3.286650000 |
| 1  | -0.187884000 | 1.426556000  | -2.861552000 |
| 6  | 1.959987000  | -2.507423000 | 1.318042000  |
| 1  | 0.883147000  | -2.698629000 | 1.253069000  |
| 6  | -0.928644000 | 3.829374000  | -0.189037000 |
| 1  | -1.935444000 | 4.227720000  | -0.013204000 |
| 6  | -1.909614000 | 1.367222000  | -1.532977000 |
| 1  | -2.656374000 | 0.632049000  | -1.215683000 |
| 1  | -2.449782000 | 2.161690000  | -2.053930000 |
| 6  | -2.357125000 | 1.678942000  | 1.313193000  |
| 1  | -2.478560000 | 0.590678000  | 1.237317000  |
| 6  | 1.517715000  | -2.094587000 | -1.517370000 |
| 1  | 2.295974000  | -2.658530000 | -2.038745000 |
| 1  | 0.766224000  | -2.810671000 | -1.166340000 |
| 6  | 4.635567000  | -0.077061000 | 0.728329000  |
| 1  | 4.224210000  | 0.929314000  | 0.602806000  |
| 1  | 5.720794000  | -0.023082000 | 0.578727000  |
| 1  | 4.457191000  | -0.382197000 | 1.762488000  |
| 6  | 4.358413000  | -0.602413000 | -1.723738000 |
| 1  | 4.007592000  | -1.309803000 | -2.480771000 |

|   |              |              |              |
|---|--------------|--------------|--------------|
| 1 | 5.447709000  | -0.527511000 | -1.828202000 |
| 1 | 3.937000000  | 0.380458000  | -1.949893000 |
| 6 | 4.012749000  | -1.047390000 | -0.291243000 |
| 1 | 4.437211000  | -2.046628000 | -0.135779000 |
| 6 | 1.882029000  | 1.733180000  | -0.850962000 |
| 6 | 1.438069000  | 1.264415000  | 1.616918000  |
| 6 | 2.258337000  | -1.993141000 | 2.734284000  |
| 1 | 3.330435000  | -1.834170000 | 2.891867000  |
| 1 | 1.930284000  | -2.736410000 | 3.471460000  |
| 1 | 1.737101000  | -1.055567000 | 2.941023000  |
| 6 | 2.701062000  | -3.824679000 | 1.039585000  |
| 1 | 2.497080000  | -4.216541000 | 0.037824000  |
| 1 | 2.382023000  | -4.585525000 | 1.762597000  |
| 1 | 3.785584000  | -3.710350000 | 1.146614000  |
| 6 | -3.708691000 | 2.354051000  | 1.033035000  |
| 1 | -3.645203000 | 3.441063000  | 1.151871000  |
| 1 | -4.458091000 | 1.992596000  | 1.747928000  |
| 1 | -4.084775000 | 2.146206000  | 0.026153000  |
| 6 | -0.489257000 | 4.242560000  | -1.605540000 |
| 1 | 0.494186000  | 3.833857000  | -1.852341000 |
| 1 | -0.417123000 | 5.335557000  | -1.659284000 |
| 1 | -1.197439000 | 3.926017000  | -2.376636000 |
| 6 | 0.035387000  | 4.423376000  | 0.853772000  |
| 1 | -0.248734000 | 4.178541000  | 1.880113000  |
| 1 | 0.055008000  | 5.516111000  | 0.763505000  |
| 1 | 1.051279000  | 4.049699000  | 0.692640000  |
| 6 | -1.873798000 | 1.978945000  | 2.739934000  |
| 1 | -0.905745000 | 1.515047000  | 2.942452000  |
| 1 | -2.599516000 | 1.590526000  | 3.464720000  |
| 1 | -1.786116000 | 3.056207000  | 2.916105000  |
| 1 | -0.767052000 | -0.933742000 | -1.245928000 |
| 1 | -0.129236000 | -0.319614000 | 0.943337000  |
| 7 | -3.244269000 | -2.792209000 | 0.775359000  |
| 1 | -3.172745000 | -2.862875000 | 1.780989000  |
| 6 | -4.159058000 | -1.860995000 | 0.110049000  |
| 1 | -3.930494000 | -0.831608000 | 0.416924000  |
| 6 | -5.629968000 | -2.156203000 | 0.372724000  |
| 1 | -5.874873000 | -3.184619000 | 0.089074000  |
| 1 | -5.868070000 | -2.017415000 | 1.431730000  |
| 1 | -6.257292000 | -1.470542000 | -0.206289000 |
| 6 | -3.718068000 | -2.093239000 | -1.346750000 |
| 1 | -4.307024000 | -2.884713000 | -1.822180000 |
| 1 | -3.736196000 | -1.196304000 | -1.965026000 |
| 6 | -2.144632000 | -3.057452000 | 0.017800000  |
| 8 | -2.343740000 | -2.554279000 | -1.244194000 |
| 8 | -1.122148000 | -3.644246000 | 0.326821000  |



-2062.188700

**TS6**

|    |              |              |              |
|----|--------------|--------------|--------------|
| 25 | -0.169011000 | -0.572037000 | 0.130515000  |
| 15 | -2.414297000 | 0.078232000  | -0.162022000 |
| 15 | 2.101986000  | -1.001357000 | -0.110843000 |
| 8  | -0.892883000 | -3.365717000 | -0.351664000 |
| 8  | -0.321066000 | -1.050780000 | 3.030698000  |
| 7  | 0.002699000  | 0.089514000  | -1.901756000 |
| 6  | -1.271288000 | 0.053091000  | -2.671550000 |
| 1  | -1.517550000 | -0.999067000 | -2.839830000 |
| 1  | -1.130244000 | 0.524576000  | -3.653721000 |
| 6  | 1.104473000  | -0.567941000 | -2.654851000 |
| 1  | 1.216153000  | -0.108686000 | -3.646269000 |
| 1  | 0.809741000  | -1.611400000 | -2.801019000 |
| 6  | -3.182157000 | 1.449653000  | 0.846297000  |
| 1  | -2.382348000 | 2.193127000  | 0.881694000  |
| 6  | 2.759093000  | -2.758761000 | 0.010537000  |
| 1  | 3.849888000  | -2.662265000 | 0.010688000  |
| 6  | 2.418496000  | -0.486734000 | -1.877924000 |
| 1  | 2.782532000  | 0.545266000  | -1.866703000 |
| 1  | 3.191155000  | -1.091643000 | -2.359485000 |
| 6  | 3.344534000  | 0.043775000  | 0.834073000  |
| 1  | 3.167361000  | 1.030233000  | 0.395962000  |
| 6  | -2.374603000 | 0.763367000  | -1.889890000 |
| 1  | -3.335992000 | 0.679170000  | -2.403602000 |
| 1  | -2.128089000 | 1.823867000  | -1.789424000 |
| 6  | -3.647665000 | -2.159914000 | 1.085713000  |
| 1  | -3.679496000 | -3.215582000 | 0.799287000  |
| 1  | -4.473597000 | -1.975979000 | 1.777998000  |
| 1  | -2.717859000 | -2.009396000 | 1.639415000  |
| 6  | -3.807770000 | -2.079960000 | -1.467190000 |
| 1  | -3.962309000 | -1.459522000 | -2.354415000 |
| 1  | -4.653725000 | -2.774429000 | -1.405917000 |
| 1  | -2.905796000 | -2.678059000 | -1.613345000 |
| 6  | -3.751032000 | -1.250839000 | -0.170197000 |
| 1  | -4.689790000 | -0.689159000 | -0.116490000 |
| 6  | -0.596991000 | -2.243961000 | -0.190787000 |
| 6  | -0.258283000 | -0.862391000 | 1.880695000  |
| 6  | -3.449581000 | 1.002336000  | 2.291800000  |
| 1  | -4.275274000 | 0.284995000  | 2.350571000  |
| 1  | -3.727751000 | 1.874779000  | 2.894145000  |
| 1  | -2.563949000 | 0.553499000  | 2.747946000  |
| 6  | -4.436207000 | 2.073713000  | 0.213081000  |
| 1  | -4.249963000 | 2.459281000  | -0.793810000 |

|   |              |              |              |
|---|--------------|--------------|--------------|
| 1 | -4.766757000 | 2.917348000  | 0.831107000  |
| 1 | -5.272291000 | 1.366946000  | 0.158017000  |
| 6 | 4.818278000  | -0.312673000 | 0.582994000  |
| 1 | 5.098457000  | -1.243966000 | 1.085689000  |
| 1 | 5.456759000  | 0.481075000  | 0.987398000  |
| 1 | 5.048396000  | -0.414753000 | -0.482666000 |
| 6 | 2.379302000  | -3.642234000 | -1.191017000 |
| 1 | 1.300608000  | -3.781568000 | -1.278589000 |
| 1 | 2.828807000  | -4.633082000 | -1.057295000 |
| 1 | 2.754324000  | -3.242699000 | -2.137250000 |
| 6 | 2.323847000  | -3.405884000 | 1.336899000  |
| 1 | 2.639196000  | -2.824705000 | 2.207466000  |
| 1 | 2.769534000  | -4.403341000 | 1.424541000  |
| 1 | 1.237232000  | -3.517591000 | 1.383955000  |
| 6 | 3.032232000  | 0.137657000  | 2.335931000  |
| 1 | 2.002029000  | 0.453236000  | 2.519003000  |
| 1 | 3.701908000  | 0.867885000  | 2.805495000  |
| 1 | 3.186906000  | -0.818407000 | 2.844933000  |
| 1 | 0.229104000  | 1.079901000  | -1.769845000 |
| 1 | 0.357835000  | 1.203482000  | 0.580575000  |
| 7 | 1.558323000  | 3.033408000  | 0.776372000  |
| 1 | 2.233534000  | 2.575751000  | 1.375901000  |
| 6 | 1.959450000  | 3.278885000  | -0.599364000 |
| 1 | 2.289567000  | 2.359795000  | -1.114856000 |
| 6 | 3.060359000  | 4.325261000  | -0.726169000 |
| 1 | 2.755620000  | 5.261574000  | -0.246912000 |
| 1 | 3.982994000  | 3.977771000  | -0.248950000 |
| 1 | 3.281195000  | 4.523638000  | -1.781072000 |
| 6 | 0.601262000  | 3.696967000  | -1.172214000 |
| 1 | 0.405204000  | 4.756583000  | -0.949875000 |
| 1 | 0.525727000  | 3.540844000  | -2.254437000 |
| 6 | 0.233907000  | 2.414245000  | 0.819260000  |
| 8 | -0.343512000 | 2.858291000  | -0.505611000 |
| 8 | -0.473058000 | 2.595964000  | 1.853454000  |

-2062.149256

**15**

|    |              |              |              |
|----|--------------|--------------|--------------|
| 25 | 0.772362000  | 0.653458000  | 0.080360000  |
| 15 | 2.236082000  | -1.153215000 | -0.053589000 |
| 15 | -1.143332000 | 1.941082000  | -0.110179000 |
| 8  | 2.642519000  | 2.643291000  | -0.948595000 |
| 8  | 1.508680000  | 1.541059000  | 2.795018000  |
| 7  | 0.132159000  | -0.047570000 | -1.830126000 |
| 6  | 1.209104000  | -0.751842000 | -2.580319000 |
| 1  | 1.964038000  | -0.004710000 | -2.844162000 |

|   |              |              |              |
|---|--------------|--------------|--------------|
| 1 | 0.804819000  | -1.166949000 | -3.513470000 |
| 6 | -0.488278000 | 1.035372000  | -2.643853000 |
| 1 | -0.831206000 | 0.633654000  | -3.606593000 |
| 1 | 0.286470000  | 1.780323000  | -2.848878000 |
| 6 | 1.865272000  | -2.564801000 | 1.117686000  |
| 1 | 0.886669000  | -2.891336000 | 0.737595000  |
| 6 | -1.214884000 | 3.789983000  | 0.128529000  |
| 1 | -2.243747000 | 4.073644000  | -0.126791000 |
| 6 | -1.659705000 | 1.662578000  | -1.883335000 |
| 1 | -2.508775000 | 0.974296000  | -1.880621000 |
| 1 | -1.983296000 | 2.590105000  | -2.363469000 |
| 6 | -2.559250000 | 1.190864000  | 0.855211000  |
| 1 | -2.677460000 | 0.244929000  | 0.318454000  |
| 6 | 1.801849000  | -1.865215000 | -1.715192000 |
| 1 | 2.653980000  | -2.339989000 | -2.209833000 |
| 1 | 1.030540000  | -2.620094000 | -1.520520000 |
| 6 | 4.534062000  | -0.099009000 | 1.180171000  |
| 1 | 4.111845000  | 0.910938000  | 1.169111000  |
| 1 | 5.626188000  | -0.007289000 | 1.189722000  |
| 1 | 4.232964000  | -0.579700000 | 2.114771000  |
| 6 | 4.594237000  | -0.230319000 | -1.350601000 |
| 1 | 4.337164000  | -0.805704000 | -2.244324000 |
| 1 | 5.687389000  | -0.156926000 | -1.312279000 |
| 1 | 4.200469000  | 0.781626000  | -1.467902000 |
| 6 | 4.090291000  | -0.895396000 | -0.057962000 |
| 1 | 4.524804000  | -1.900495000 | -0.006998000 |
| 6 | 1.890634000  | 1.846948000  | -0.537280000 |
| 6 | 1.203477000  | 1.166193000  | 1.733580000  |
| 6 | 1.693568000  | -2.124771000 | 2.579157000  |
| 1 | 2.625017000  | -1.755637000 | 3.021115000  |
| 1 | 1.363125000  | -2.981840000 | 3.177975000  |
| 1 | 0.938097000  | -1.340256000 | 2.675366000  |
| 6 | 2.840161000  | -3.745803000 | 0.988236000  |
| 1 | 2.980393000  | -4.055206000 | -0.052980000 |
| 1 | 2.441483000  | -4.606952000 | 1.537382000  |
| 1 | 3.823524000  | -3.513049000 | 1.412502000  |
| 6 | -3.872690000 | 1.979847000  | 0.763897000  |
| 1 | -3.819472000 | 2.919116000  | 1.324509000  |
| 1 | -4.687824000 | 1.384715000  | 1.191801000  |
| 1 | -4.141965000 | 2.215197000  | -0.271276000 |
| 6 | -0.257785000 | 4.518515000  | -0.829705000 |
| 1 | 0.785649000  | 4.333639000  | -0.564115000 |
| 1 | -0.434377000 | 5.597930000  | -0.764607000 |
| 1 | -0.398635000 | 4.224898000  | -1.874606000 |
| 6 | -0.934501000 | 4.186060000  | 1.587183000  |
| 1 | -1.678450000 | 3.781776000  | 2.278022000  |

|   |              |              |              |
|---|--------------|--------------|--------------|
| 1 | -0.956034000 | 5.277667000  | 1.681144000  |
| 1 | 0.053577000  | 3.841641000  | 1.909672000  |
| 6 | -2.187363000 | 0.835179000  | 2.303485000  |
| 1 | -1.302145000 | 0.192746000  | 2.339006000  |
| 1 | -3.016102000 | 0.286128000  | 2.765589000  |
| 1 | -1.990963000 | 1.718947000  | 2.917459000  |
| 1 | -0.621818000 | -0.730132000 | -1.646812000 |
| 1 | -1.304759000 | -1.809492000 | 0.662056000  |
| 7 | -2.948579000 | -3.181958000 | 0.419842000  |
| 1 | -2.838568000 | -3.445492000 | 1.396715000  |
| 6 | -4.030504000 | -2.217426000 | 0.227053000  |
| 1 | -3.972358000 | -1.379027000 | 0.945203000  |
| 6 | -5.417604000 | -2.843692000 | 0.325886000  |
| 1 | -5.511460000 | -3.677849000 | -0.378419000 |
| 1 | -5.603149000 | -3.224906000 | 1.336277000  |
| 1 | -6.193776000 | -2.102723000 | 0.099333000  |
| 6 | -3.670565000 | -1.692841000 | -1.169343000 |
| 1 | -4.048298000 | -2.381956000 | -1.941347000 |
| 1 | -4.092136000 | -0.697067000 | -1.361751000 |
| 6 | -1.679627000 | -2.573922000 | -0.073438000 |
| 8 | -2.249204000 | -1.641587000 | -1.188963000 |
| 8 | -0.775269000 | -3.389753000 | -0.504183000 |

-2062.152342

**16**

|    |              |              |              |
|----|--------------|--------------|--------------|
| 25 | 0.138007000  | -0.745274000 | -0.107071000 |
| 15 | 2.411415000  | -0.338587000 | 0.233992000  |
| 15 | -2.189896000 | -0.848237000 | 0.029590000  |
| 8  | 0.484560000  | -3.610813000 | -0.512033000 |
| 8  | 0.192906000  | -0.248891000 | -3.018677000 |
| 7  | 0.034989000  | -0.374005000 | 1.795990000  |
| 6  | 1.192736000  | -0.642603000 | 2.673685000  |
| 1  | 1.292989000  | -1.727555000 | 2.837132000  |
| 1  | 1.030912000  | -0.189983000 | 3.664973000  |
| 6  | -1.196255000 | -0.560724000 | 2.580409000  |
| 1  | -1.170801000 | 0.079622000  | 3.478122000  |
| 1  | -1.255068000 | -1.597370000 | 2.949288000  |
| 6  | 3.147339000  | 1.270649000  | -0.405508000 |
| 1  | 2.410042000  | 1.998598000  | -0.042763000 |
| 6  | -3.079385000 | -2.503283000 | -0.003741000 |
| 1  | -4.144445000 | -2.263457000 | 0.103297000  |
| 6  | -2.440702000 | -0.222431000 | 1.760449000  |
| 1  | -2.553528000 | 0.863785000  | 1.689727000  |
| 1  | -3.352709000 | -0.613964000 | 2.221464000  |
| 6  | -3.281194000 | 0.313786000  | -0.976225000 |

|   |              |              |              |
|---|--------------|--------------|--------------|
| 1 | -2.767201000 | 1.272282000  | -0.846637000 |
| 6 | 2.475138000  | -0.070044000 | 2.071492000  |
| 1 | 3.373327000  | -0.495640000 | 2.525791000  |
| 1 | 2.499609000  | 1.010398000  | 2.234422000  |
| 6 | 3.566653000  | -2.156772000 | -1.595855000 |
| 1 | 2.612431000  | -2.662892000 | -1.761984000 |
| 1 | 4.368615000  | -2.874069000 | -1.806455000 |
| 1 | 3.646009000  | -1.346097000 | -2.323126000 |
| 6 | 3.596609000  | -2.845463000 | 0.841395000  |
| 1 | 3.806128000  | -2.548215000 | 1.872496000  |
| 1 | 4.337183000  | -3.604233000 | 0.562314000  |
| 1 | 2.612359000  | -3.319486000 | 0.815015000  |
| 6 | 3.685698000  | -1.663581000 | -0.141985000 |
| 1 | 4.665085000  | -1.187068000 | -0.012438000 |
| 6 | 0.342438000  | -2.451591000 | -0.386586000 |
| 6 | 0.175487000  | -0.430317000 | -1.859808000 |
| 6 | 3.216750000  | 1.370120000  | -1.936706000 |
| 1 | 4.029555000  | 0.754814000  | -2.335729000 |
| 1 | 3.411226000  | 2.408362000  | -2.223029000 |
| 1 | 2.287213000  | 1.068123000  | -2.420851000 |
| 6 | 4.511982000  | 1.619274000  | 0.214148000  |
| 1 | 4.504845000  | 1.588250000  | 1.307228000  |
| 1 | 4.797290000  | 2.634549000  | -0.086251000 |
| 1 | 5.296754000  | 0.942774000  | -0.141213000 |
| 6 | -4.711151000 | 0.464104000  | -0.429231000 |
| 1 | -5.286589000 | -0.458926000 | -0.556922000 |
| 1 | -5.231346000 | 1.252980000  | -0.985199000 |
| 1 | -4.733907000 | 0.736889000  | 0.629310000  |
| 6 | -2.669776000 | -3.391578000 | 1.184560000  |
| 1 | -1.592761000 | -3.581514000 | 1.191860000  |
| 1 | -3.177426000 | -4.359878000 | 1.104482000  |
| 1 | -2.949599000 | -2.954264000 | 2.146221000  |
| 6 | -2.875438000 | -3.255011000 | -1.331842000 |
| 1 | -3.170992000 | -2.666793000 | -2.201651000 |
| 1 | -3.483336000 | -4.167472000 | -1.327018000 |
| 1 | -1.832826000 | -3.551984000 | -1.463574000 |
| 6 | -3.310238000 | 0.021155000  | -2.486326000 |
| 1 | -2.318677000 | -0.176783000 | -2.897580000 |
| 1 | -3.725225000 | 0.888910000  | -3.012035000 |
| 1 | -3.956809000 | -0.831579000 | -2.712749000 |
| 1 | 0.297280000  | 1.483131000  | 1.739424000  |
| 1 | 0.178043000  | 2.227038000  | -1.297332000 |
| 7 | -0.530791000 | 3.942918000  | -0.419728000 |
| 1 | -0.458323000 | 4.954121000  | -0.366982000 |
| 6 | -1.358422000 | 3.255077000  | 0.567885000  |
| 1 | -1.446671000 | 2.223433000  | 0.215510000  |

|   |              |             |              |
|---|--------------|-------------|--------------|
| 6 | -2.747308000 | 3.891121000 | 0.646740000  |
| 1 | -2.679741000 | 4.931264000 | 0.985801000  |
| 1 | -3.233872000 | 3.878138000 | -0.332719000 |
| 1 | -3.379955000 | 3.347080000 | 1.354879000  |
| 6 | -0.663525000 | 3.192490000 | 1.938504000  |
| 1 | -0.405422000 | 4.205247000 | 2.269938000  |
| 1 | -1.367124000 | 2.771715000 | 2.673097000  |
| 6 | 0.266825000  | 3.327611000 | -1.316937000 |
| 8 | 0.533969000  | 2.437952000 | 1.885559000  |
| 8 | 1.019760000  | 3.911454000 | -2.102279000 |

-2062.184009

**17**

|   |              |              |              |
|---|--------------|--------------|--------------|
| 1 | -0.870900000 | 2.226869000  | 0.910567000  |
| 1 | 1.541846000  | 0.357801000  | 1.337330000  |
| 7 | 0.606130000  | -0.560678000 | -0.243195000 |
| 1 | 0.706514000  | -0.900609000 | -1.194608000 |
| 6 | -0.746253000 | -0.441394000 | 0.302013000  |
| 1 | -0.639668000 | -0.288780000 | 1.382933000  |
| 6 | -1.537182000 | -1.728173000 | 0.051908000  |
| 1 | -1.647367000 | -1.914864000 | -1.022589000 |
| 1 | -1.026709000 | -2.584970000 | 0.499785000  |
| 1 | -2.538325000 | -1.653547000 | 0.486575000  |
| 6 | -1.467694000 | 0.783069000  | -0.285615000 |
| 1 | -1.519561000 | 0.689563000  | -1.375313000 |
| 1 | -2.494241000 | 0.819161000  | 0.103207000  |
| 6 | 1.715730000  | -0.045665000 | 0.325482000  |
| 8 | -0.777137000 | 2.005252000  | -0.026184000 |
| 8 | 2.834375000  | -0.034365000 | -0.197347000 |

-362.999030

**18**

|    |              |              |              |
|----|--------------|--------------|--------------|
| 25 | 0.670375000  | 0.681629000  | -0.191682000 |
| 15 | -1.237285000 | 1.894484000  | 0.081491000  |
| 15 | 2.166400000  | -1.018156000 | 0.080429000  |
| 8  | 2.560716000  | 2.911275000  | 0.204916000  |
| 8  | 0.876270000  | 0.915388000  | -3.104431000 |
| 7  | 0.300806000  | 0.242082000  | 2.008508000  |
| 6  | -0.368298000 | 1.376466000  | 2.673746000  |
| 1  | 0.321435000  | 2.226261000  | 2.665228000  |
| 1  | -0.601953000 | 1.136771000  | 3.722218000  |
| 6  | 1.529993000  | -0.234835000 | 2.672894000  |
| 1  | 1.331532000  | -0.501788000 | 3.722090000  |
| 1  | 2.257757000  | 0.582686000  | 2.662658000  |

|   |              |              |              |
|---|--------------|--------------|--------------|
| 6 | -2.812358000 | 1.255632000  | -0.717078000 |
| 1 | -2.849053000 | 0.250061000  | -0.285185000 |
| 6 | 4.005215000  | -0.751826000 | -0.217729000 |
| 1 | 4.483543000  | -1.737652000 | -0.174981000 |
| 6 | 2.051725000  | -1.450526000 | 1.900671000  |
| 1 | 1.329338000  | -2.269621000 | 1.991866000  |
| 1 | 3.002485000  | -1.804893000 | 2.308401000  |
| 6 | 1.775280000  | -2.679013000 | -0.704317000 |
| 1 | 0.807129000  | -2.892251000 | -0.239644000 |
| 6 | -1.650543000 | 1.700899000  | 1.900413000  |
| 1 | -2.153362000 | 2.580785000  | 2.310807000  |
| 1 | -2.345391000 | 0.857892000  | 1.988988000  |
| 6 | -0.685987000 | 4.084458000  | -1.591677000 |
| 1 | 0.361101000  | 3.772171000  | -1.654776000 |
| 1 | -0.731588000 | 5.165698000  | -1.769757000 |
| 1 | -1.228861000 | 3.590225000  | -2.401596000 |
| 6 | -0.505181000 | 4.530883000  | 0.886139000  |
| 1 | -0.936914000 | 4.389137000  | 1.881179000  |
| 1 | -0.545607000 | 5.604016000  | 0.663178000  |
| 1 | 0.547738000  | 4.240834000  | 0.924066000  |
| 6 | -1.264788000 | 3.754809000  | -0.204285000 |
| 1 | -2.315621000 | 4.067565000  | -0.172792000 |
| 6 | 1.803437000  | 2.012071000  | 0.097273000  |
| 6 | 0.801723000  | 0.832372000  | -1.931216000 |
| 6 | -2.701605000 | 1.091010000  | -2.239472000 |
| 1 | -2.698478000 | 2.057289000  | -2.754435000 |
| 1 | -3.566367000 | 0.528601000  | -2.613561000 |
| 1 | -1.794692000 | 0.549168000  | -2.516137000 |
| 6 | -4.096434000 | 2.004060000  | -0.328294000 |
| 1 | -4.193952000 | 2.134955000  | 0.754437000  |
| 1 | -4.971691000 | 1.440790000  | -0.675203000 |
| 1 | -4.142560000 | 2.994208000  | -0.794824000 |
| 6 | 2.748270000  | -3.814085000 | -0.348792000 |
| 1 | 3.711512000  | -3.693113000 | -0.856581000 |
| 1 | 2.329099000  | -4.774907000 | -0.672114000 |
| 1 | 2.938383000  | -3.881025000 | 0.727616000  |
| 6 | 4.651593000  | 0.137320000  | 0.858949000  |
| 1 | 4.198081000  | 1.131081000  | 0.881863000  |
| 1 | 5.717788000  | 0.263593000  | 0.634780000  |
| 1 | 4.578963000  | -0.296361000 | 1.860514000  |
| 6 | 4.229576000  | -0.147177000 | -1.614748000 |
| 1 | 3.839451000  | -0.783836000 | -2.413362000 |
| 1 | 5.301915000  | -0.004466000 | -1.795071000 |
| 1 | 3.736325000  | 0.826704000  | -1.694546000 |
| 6 | 1.546219000  | -2.593572000 | -2.220245000 |
| 1 | 0.851099000  | -1.788943000 | -2.470450000 |

|   |              |              |              |
|---|--------------|--------------|--------------|
| 1 | 1.125515000  | -3.539178000 | -2.584292000 |
| 1 | 2.480871000  | -2.422933000 | -2.764688000 |
| 1 | -0.358147000 | -0.538669000 | 2.012597000  |
| 1 | -0.392367000 | -0.539472000 | -0.464255000 |
| 7 | -3.244931000 | -1.945281000 | 0.671988000  |
| 1 | -3.973769000 | -1.492372000 | 1.203994000  |
| 6 | -3.462646000 | -2.594665000 | -0.620866000 |
| 1 | -3.727812000 | -1.845388000 | -1.373164000 |
| 6 | -4.529335000 | -3.688857000 | -0.563913000 |
| 1 | -4.249010000 | -4.464686000 | 0.156564000  |
| 1 | -5.496238000 | -3.270157000 | -0.267057000 |
| 1 | -4.644927000 | -4.151490000 | -1.549681000 |
| 6 | -2.028718000 | -3.115968000 | -0.872293000 |
| 1 | -2.000165000 | -4.115032000 | -1.308115000 |
| 1 | -1.436242000 | -2.414564000 | -1.465278000 |
| 6 | -2.110898000 | -2.365167000 | 1.286023000  |
| 8 | -1.422457000 | -3.182645000 | 0.446999000  |
| 8 | -1.707149000 | -2.081102000 | 2.408913000  |

-2062.192601

**TS7**

|    |              |              |              |
|----|--------------|--------------|--------------|
| 25 | -0.191024000 | -0.600382000 | -0.151374000 |
| 15 | 2.062383000  | -1.055241000 | 0.140559000  |
| 15 | -2.430366000 | -0.032304000 | 0.143322000  |
| 8  | -0.826530000 | -3.428568000 | -0.609098000 |
| 8  | -0.120147000 | -0.053733000 | -3.036919000 |
| 7  | -0.230630000 | -0.634217000 | 2.004366000  |
| 6  | 0.897086000  | -1.359936000 | 2.633087000  |
| 1  | 0.726512000  | -2.430534000 | 2.486831000  |
| 1  | 0.915866000  | -1.171633000 | 3.716335000  |
| 6  | -1.543749000 | -1.039543000 | 2.563145000  |
| 1  | -1.528603000 | -0.977661000 | 3.661011000  |
| 1  | -1.720842000 | -2.084311000 | 2.288442000  |
| 6  | 3.351674000  | 0.171572000  | -0.440997000 |
| 1  | 2.967908000  | 1.081259000  | 0.030647000  |
| 6  | -3.773083000 | -1.137404000 | -0.579686000 |
| 1  | -4.697734000 | -0.552017000 | -0.522900000 |
| 6  | -2.629728000 | -0.125249000 | 1.995680000  |
| 1  | -2.472429000 | 0.891948000  | 2.368028000  |
| 1  | -3.626576000 | -0.448788000 | 2.304666000  |
| 6  | -3.033631000 | 1.706676000  | -0.205702000 |
| 1  | -2.331921000 | 2.296885000  | 0.388037000  |
| 6  | 2.217126000  | -0.924337000 | 1.993826000  |
| 1  | 3.058084000  | -1.497400000 | 2.394936000  |
| 1  | 2.398387000  | 0.134826000  | 2.210688000  |



|   |              |              |              |
|---|--------------|--------------|--------------|
| 6 | 2.481280000  | -3.107428000 | -1.755412000 |
| 1 | 1.410867000  | -3.271637000 | -1.901800000 |
| 1 | 3.003290000  | -4.035320000 | -2.018121000 |
| 1 | 2.799812000  | -2.336012000 | -2.460374000 |
| 6 | 2.354002000  | -3.862977000 | 0.658933000  |
| 1 | 2.657821000  | -3.674199000 | 1.692565000  |
| 1 | 2.827175000  | -4.801514000 | 0.346158000  |
| 1 | 1.272654000  | -4.018208000 | 0.637779000  |
| 6 | 2.790201000  | -2.735706000 | -0.293015000 |
| 1 | 3.875018000  | -2.618484000 | -0.187546000 |
| 6 | -0.581572000 | -2.298134000 | -0.400905000 |
| 6 | -0.142917000 | -0.280745000 | -1.886079000 |
| 6 | 3.358186000  | 0.392037000  | -1.961488000 |
| 1 | 3.785417000  | -0.462175000 | -2.497151000 |
| 1 | 3.978851000  | 1.264229000  | -2.200383000 |
| 1 | 2.355952000  | 0.575843000  | -2.355201000 |
| 6 | 4.772834000  | -0.082848000 | 0.086984000  |
| 1 | 4.797192000  | -0.228613000 | 1.171475000  |
| 1 | 5.405483000  | 0.783107000  | -0.143633000 |
| 1 | 5.236533000  | -0.956599000 | -0.384206000 |
| 6 | -4.460129000 | 2.003196000  | 0.285833000  |
| 1 | -5.217534000 | 1.498788000  | -0.323974000 |
| 1 | -4.651626000 | 3.080727000  | 0.212789000  |
| 1 | -4.614738000 | 1.711045000  | 1.329388000  |
| 6 | -4.001494000 | -2.437064000 | 0.212534000  |
| 1 | -3.108268000 | -3.065276000 | 0.234852000  |
| 1 | -4.798858000 | -3.015647000 | -0.269308000 |
| 1 | -4.315307000 | -2.247439000 | 1.242886000  |
| 6 | -3.487917000 | -1.444744000 | -2.061465000 |
| 1 | -3.328205000 | -0.539873000 | -2.653062000 |
| 1 | -4.338472000 | -1.983339000 | -2.496217000 |
| 1 | -2.600518000 | -2.073919000 | -2.171150000 |
| 6 | -2.852262000 | 2.118955000  | -1.673370000 |
| 1 | -1.842833000 | 1.904637000  | -2.030741000 |
| 1 | -3.021340000 | 3.197501000  | -1.774048000 |
| 1 | -3.569599000 | 1.612438000  | -2.328278000 |
| 1 | -0.122483000 | 0.372712000  | 2.212892000  |
| 1 | 0.261805000  | 1.087669000  | 0.151648000  |
| 7 | 1.748892000  | 2.672475000  | 0.823106000  |
| 1 | 2.107559000  | 2.985021000  | 1.718856000  |
| 6 | 2.004407000  | 3.565479000  | -0.318697000 |
| 1 | 2.833119000  | 3.183165000  | -0.926498000 |
| 6 | 2.302610000  | 5.004372000  | 0.109175000  |
| 1 | 1.450768000  | 5.427043000  | 0.653045000  |
| 1 | 3.183079000  | 5.041765000  | 0.760492000  |
| 1 | 2.503861000  | 5.630045000  | -0.767458000 |

|   |              |             |              |
|---|--------------|-------------|--------------|
| 6 | 0.672368000  | 3.423157000 | -1.087221000 |
| 1 | 0.381335000  | 4.325573000 | -1.627593000 |
| 1 | 0.694956000  | 2.567603000 | -1.774735000 |
| 6 | 0.348956000  | 2.390080000 | 0.916532000  |
| 8 | -0.292771000 | 3.181037000 | -0.059983000 |
| 8 | -0.207975000 | 2.208169000 | 2.028949000  |

-2062.160630

**19**

|    |              |              |              |
|----|--------------|--------------|--------------|
| 25 | -0.085212000 | -0.556654000 | -0.139296000 |
| 15 | 2.222796000  | -0.804849000 | 0.151255000  |
| 15 | -2.397059000 | -0.294512000 | 0.104110000  |
| 8  | -0.380570000 | -3.385815000 | -0.797824000 |
| 8  | 0.012708000  | 0.211967000  | -2.981167000 |
| 7  | -0.129054000 | -0.782711000 | 1.959096000  |
| 6  | 1.016012000  | -1.539307000 | 2.524873000  |
| 1  | 0.914091000  | -2.589203000 | 2.232993000  |
| 1  | 0.991573000  | -1.494497000 | 3.622832000  |
| 6  | -1.427849000 | -1.245833000 | 2.508453000  |
| 1  | -1.412562000 | -1.192971000 | 3.606114000  |
| 1  | -1.566462000 | -2.294755000 | 2.228673000  |
| 6  | 3.370959000  | 0.618421000  | -0.228619000 |
| 1  | 2.837614000  | 1.455200000  | 0.239123000  |
| 6  | -3.569344000 | -1.597840000 | -0.581799000 |
| 1  | -4.562306000 | -1.137247000 | -0.523865000 |
| 6  | -2.556051000 | -0.372688000 | 1.955851000  |
| 1  | -2.428918000 | 0.653515000  | 2.317945000  |
| 1  | -3.535431000 | -0.727581000 | 2.287383000  |
| 6  | -3.219524000 | 1.331773000  | -0.315456000 |
| 1  | -2.558922000 | 2.040623000  | 0.192320000  |
| 6  | 2.324509000  | -0.942027000 | 2.003752000  |
| 1  | 3.190671000  | -1.514920000 | 2.344307000  |
| 1  | 2.424400000  | 0.082127000  | 2.379129000  |
| 6  | 2.773981000  | -2.529442000 | -2.028355000 |
| 1  | 1.745370000  | -2.873131000 | -2.160713000 |
| 1  | 3.437425000  | -3.297844000 | -2.442291000 |
| 1  | 2.902001000  | -1.622980000 | -2.623717000 |
| 6  | 2.861937000  | -3.603189000 | 0.265994000  |
| 1  | 3.192032000  | -3.514446000 | 1.304628000  |
| 1  | 3.430333000  | -4.423313000 | -0.188328000 |
| 1  | 1.808525000  | -3.892934000 | 0.261460000  |
| 6  | 3.106616000  | -2.314903000 | -0.539199000 |
| 1  | 4.172946000  | -2.072769000 | -0.458782000 |
| 6  | -0.262469000 | -2.249074000 | -0.541978000 |
| 6  | -0.024555000 | -0.089073000 | -1.852315000 |

|   |              |              |              |
|---|--------------|--------------|--------------|
| 6 | 3.479452000  | 0.930519000  | -1.730157000 |
| 1 | 4.096964000  | 0.195150000  | -2.257344000 |
| 1 | 3.957649000  | 1.908581000  | -1.859933000 |
| 1 | 2.502385000  | 0.972101000  | -2.218643000 |
| 6 | 4.764449000  | 0.499634000  | 0.410433000  |
| 1 | 4.718204000  | 0.330356000  | 1.490488000  |
| 1 | 5.314729000  | 1.434476000  | 0.247984000  |
| 1 | 5.357739000  | -0.306626000 | -0.035921000 |
| 6 | -4.637922000 | 1.492649000  | 0.257516000  |
| 1 | -5.359027000 | 0.829076000  | -0.232878000 |
| 1 | -4.977755000 | 2.521603000  | 0.089370000  |
| 1 | -4.680134000 | 1.305565000  | 1.334873000  |
| 6 | -3.610557000 | -2.894615000 | 0.244981000  |
| 1 | -2.641736000 | -3.399169000 | 0.260591000  |
| 1 | -4.332570000 | -3.584602000 | -0.207468000 |
| 1 | -3.927821000 | -2.721271000 | 1.276839000  |
| 6 | -3.265402000 | -1.902367000 | -2.061099000 |
| 1 | -3.195517000 | -1.000395000 | -2.672799000 |
| 1 | -4.065622000 | -2.526133000 | -2.476408000 |
| 1 | -2.327052000 | -2.451182000 | -2.167599000 |
| 6 | -3.193799000 | 1.656010000  | -1.818387000 |
| 1 | -2.198521000 | 1.532081000  | -2.253532000 |
| 1 | -3.497218000 | 2.698929000  | -1.967457000 |
| 1 | -3.896157000 | 1.031884000  | -2.381252000 |
| 1 | -0.008330000 | 0.217703000  | 2.279993000  |
| 1 | 0.080667000  | 1.327581000  | 0.439872000  |
| 7 | 1.386023000  | 2.942796000  | 0.699471000  |
| 1 | 1.620699000  | 3.641854000  | 1.405729000  |
| 6 | 0.934076000  | 3.586546000  | -0.537755000 |
| 1 | 0.973737000  | 2.826654000  | -1.328623000 |
| 6 | 1.792634000  | 4.774885000  | -0.947286000 |
| 1 | 1.791456000  | 5.544188000  | -0.165444000 |
| 1 | 2.826707000  | 4.464669000  | -1.128979000 |
| 1 | 1.405535000  | 5.226984000  | -1.866663000 |
| 6 | -0.554197000 | 3.931361000  | -0.252044000 |
| 1 | -0.675917000 | 4.986646000  | 0.027472000  |
| 1 | -1.197626000 | 3.719376000  | -1.115259000 |
| 6 | 0.213564000  | 2.230089000  | 1.210789000  |
| 8 | -0.924405000 | 3.115429000  | 0.862147000  |
| 8 | 0.217076000  | 1.851922000  | 2.443914000  |

-2062.168559

**20**

|    |              |              |              |
|----|--------------|--------------|--------------|
| 25 | -0.303177000 | -0.814897000 | -0.120075000 |
| 15 | 1.902572000  | -1.496615000 | 0.163939000  |

|    |              |              |              |
|----|--------------|--------------|--------------|
| 15 | -2.406032000 | 0.173628000  | 0.119789000  |
| 8  | -1.322290000 | -3.418077000 | -0.949936000 |
| 8  | 0.018978000  | -0.131563000 | -2.972304000 |
| 7  | -0.243343000 | -0.655895000 | 1.827540000  |
| 6  | 0.694188000  | -1.477454000 | 2.621090000  |
| 1  | 0.323236000  | -2.513007000 | 2.680766000  |
| 1  | 0.745275000  | -1.103652000 | 3.656075000  |
| 6  | -1.460407000 | -0.427856000 | 2.629600000  |
| 1  | -1.188540000 | -0.029577000 | 3.620949000  |
| 1  | -1.974317000 | -1.384146000 | 2.812820000  |
| 6  | 3.302918000  | -0.348662000 | -0.367786000 |
| 1  | 3.151577000  | 0.491978000  | 0.319878000  |
| 6  | -3.964306000 | -0.843912000 | -0.124387000 |
| 1  | -4.795376000 | -0.168147000 | 0.111362000  |
| 6  | -2.392895000 | 0.561659000  | 1.934712000  |
| 1  | -1.989808000 | 1.575220000  | 2.030164000  |
| 1  | -3.397028000 | 0.552960000  | 2.369333000  |
| 6  | -2.770714000 | 1.864713000  | -0.614491000 |
| 1  | -1.938124000 | 2.449522000  | -0.205873000 |
| 6  | 2.095081000  | -1.445229000 | 2.010692000  |
| 1  | 2.729277000  | -2.252687000 | 2.387390000  |
| 1  | 2.578476000  | -0.495472000 | 2.259706000  |
| 6  | 2.258186000  | -3.436005000 | -1.850576000 |
| 1  | 1.210434000  | -3.321623000 | -2.144264000 |
| 1  | 2.574775000  | -4.450091000 | -2.120882000 |
| 1  | 2.854327000  | -2.735679000 | -2.442209000 |
| 6  | 1.711686000  | -4.307016000 | 0.473842000  |
| 1  | 1.889166000  | -4.208870000 | 1.548626000  |
| 1  | 2.083691000  | -5.292237000 | 0.169039000  |
| 1  | 0.633554000  | -4.292964000 | 0.302582000  |
| 6  | 2.439476000  | -3.221035000 | -0.338975000 |
| 1  | 3.506812000  | -3.287728000 | -0.099161000 |
| 6  | -0.907495000 | -2.366207000 | -0.632326000 |
| 6  | -0.103026000 | -0.374346000 | -1.831943000 |
| 6  | 3.189091000  | 0.199261000  | -1.797238000 |
| 1  | 3.244136000  | -0.593674000 | -2.548847000 |
| 1  | 4.016811000  | 0.892770000  | -1.987047000 |
| 1  | 2.255153000  | 0.742261000  | -1.951078000 |
| 6  | 4.703628000  | -0.922067000 | -0.096112000 |
| 1  | 4.799354000  | -1.328472000 | 0.916069000  |
| 1  | 5.452068000  | -0.129327000 | -0.209208000 |
| 1  | 4.955064000  | -1.714206000 | -0.809213000 |
| 6  | -4.090530000 | 2.478229000  | -0.113619000 |
| 1  | -4.959447000 | 1.970263000  | -0.546753000 |
| 1  | -4.141858000 | 3.529635000  | -0.420997000 |
| 1  | -4.186539000 | 2.449034000  | 0.976141000  |

|   |              |              |              |
|---|--------------|--------------|--------------|
| 6 | -4.032205000 | -2.029092000 | 0.856439000  |
| 1 | -3.172879000 | -2.695851000 | 0.748031000  |
| 1 | -4.936139000 | -2.615446000 | 0.653639000  |
| 1 | -4.082714000 | -1.700731000 | 1.898075000  |
| 6 | -4.117714000 | -1.323589000 | -1.578142000 |
| 1 | -4.166369000 | -0.495038000 | -2.287787000 |
| 1 | -5.046444000 | -1.897879000 | -1.677632000 |
| 1 | -3.290587000 | -1.974767000 | -1.871999000 |
| 6 | -2.683230000 | 1.951103000  | -2.146868000 |
| 1 | -1.749756000 | 1.542642000  | -2.535675000 |
| 1 | -2.738705000 | 3.004544000  | -2.447138000 |
| 1 | -3.513657000 | 1.432942000  | -2.636284000 |
| 1 | 0.500859000  | 0.931124000  | 1.979880000  |
| 1 | 0.911607000  | 1.605473000  | 0.061862000  |
| 7 | 2.216395000  | 3.199322000  | 0.664092000  |
| 1 | 3.040150000  | 2.622206000  | 0.517732000  |
| 6 | 1.925856000  | 4.072247000  | -0.481532000 |
| 1 | 1.970731000  | 3.510414000  | -1.430815000 |
| 6 | 2.863903000  | 5.270243000  | -0.564624000 |
| 1 | 2.816372000  | 5.857044000  | 0.359155000  |
| 1 | 3.899081000  | 4.944379000  | -0.715469000 |
| 1 | 2.588137000  | 5.915202000  | -1.406067000 |
| 6 | 0.454900000  | 4.428135000  | -0.181550000 |
| 1 | 0.374975000  | 5.358964000  | 0.394162000  |
| 1 | -0.145472000 | 4.516774000  | -1.093471000 |
| 6 | 1.019278000  | 2.399362000  | 0.835458000  |
| 8 | -0.043065000 | 3.342085000  | 0.622298000  |
| 8 | 0.948203000  | 1.830589000  | 2.083569000  |

-2062.156947

## 21

|   |              |              |              |
|---|--------------|--------------|--------------|
| 1 | 1.772716000  | -0.546707000 | 1.365950000  |
| 1 | 1.761527000  | -0.185416000 | -1.416748000 |
| 7 | -0.040979000 | -0.864128000 | -0.538966000 |
| 1 | 0.080072000  | -1.850483000 | -0.329191000 |
| 6 | -0.980410000 | -0.170376000 | 0.360689000  |
| 1 | -0.790285000 | -0.411317000 | 1.420614000  |
| 6 | -2.436995000 | -0.476087000 | 0.034622000  |
| 1 | -2.653068000 | -0.235946000 | -1.011448000 |
| 1 | -2.655344000 | -1.536310000 | 0.198281000  |
| 1 | -3.104945000 | 0.107741000  | 0.677125000  |
| 6 | -0.551511000 | 1.271123000  | 0.089623000  |
| 1 | -1.047442000 | 1.667045000  | -0.806127000 |
| 1 | -0.722669000 | 1.944600000  | 0.932312000  |
| 6 | 1.218720000  | -0.150281000 | -0.467954000 |

|   |             |              |              |
|---|-------------|--------------|--------------|
| 8 | 0.869814000 | 1.186382000  | -0.148313000 |
| 8 | 2.148620000 | -0.655206000 | 0.478327000  |

-362.972704

## 22

|    |              |              |              |
|----|--------------|--------------|--------------|
| 1  | -3.966586000 | 1.646456000  | -0.697699000 |
| 1  | -2.659183000 | 0.036547000  | 1.290223000  |
| 7  | -4.648986000 | 0.921100000  | -0.490397000 |
| 1  | -5.565396000 | 1.334141000  | -0.642951000 |
| 6  | -4.455630000 | -0.247287000 | -1.365529000 |
| 1  | -4.223125000 | 0.044601000  | -2.404036000 |
| 6  | -5.722358000 | -1.106602000 | -1.374529000 |
| 1  | -5.978722000 | -1.421472000 | -0.358469000 |
| 1  | -6.565976000 | -0.543586000 | -1.788074000 |
| 1  | -5.577532000 | -2.000968000 | -1.989009000 |
| 6  | -3.236506000 | -1.036909000 | -0.881059000 |
| 1  | -3.029632000 | -1.873608000 | -1.552007000 |
| 1  | -2.342631000 | -0.404979000 | -0.819509000 |
| 6  | -3.201247000 | -0.893725000 | 1.499743000  |
| 8  | -3.474775000 | -1.637025000 | 0.415568000  |
| 8  | -3.504929000 | -1.267235000 | 2.614360000  |
| 25 | 1.050745000  | 0.180972000  | 0.113949000  |
| 15 | 1.165534000  | -2.068281000 | -0.237016000 |
| 15 | 0.318073000  | 2.326359000  | -0.104635000 |
| 8  | 3.936223000  | 0.747280000  | -0.128331000 |
| 8  | 1.218881000  | 0.118024000  | 3.038160000  |
| 7  | 0.601414000  | 0.161347000  | -2.116503000 |
| 6  | 1.297074000  | -0.955940000 | -2.788383000 |
| 1  | 2.372259000  | -0.770762000 | -2.705827000 |
| 1  | 1.038365000  | -0.998123000 | -3.856843000 |
| 6  | 0.815753000  | 1.493454000  | -2.717739000 |
| 1  | 0.540207000  | 1.496174000  | -3.782820000 |
| 1  | 1.882979000  | 1.722439000  | -2.643118000 |
| 6  | -0.223522000 | -3.140787000 | 0.430388000  |
| 1  | -1.095365000 | -2.645909000 | -0.012595000 |
| 6  | 1.426251000  | 3.784138000  | 0.326624000  |
| 1  | 0.797999000  | 4.683135000  | 0.319920000  |
| 6  | -0.020645000 | 2.513967000  | -1.941046000 |
| 1  | -1.085524000 | 2.303291000  | -2.099706000 |
| 1  | 0.161116000  | 3.530746000  | -2.299154000 |
| 6  | -1.366281000 | 2.756771000  | 0.605432000  |
| 1  | -1.978683000 | 1.983504000  | 0.124845000  |
| 6  | 0.908230000  | -2.259790000 | -2.085506000 |
| 1  | 1.454133000  | -3.111837000 | -2.499046000 |
| 1  | -0.158948000 | -2.454170000 | -2.247178000 |

|   |              |              |              |
|---|--------------|--------------|--------------|
| 6 | 3.237961000  | -2.713084000 | 1.547124000  |
| 1 | 3.500800000  | -1.654906000 | 1.639116000  |
| 1 | 4.131298000  | -3.307807000 | 1.772495000  |
| 1 | 2.486978000  | -2.936136000 | 2.308909000  |
| 6 | 3.859115000  | -2.723353000 | -0.897729000 |
| 1 | 3.584452000  | -3.008488000 | -1.917248000 |
| 1 | 4.758999000  | -3.290970000 | -0.631905000 |
| 1 | 4.125598000  | -1.663297000 | -0.897204000 |
| 6 | 2.746975000  | -3.023859000 | 0.122351000  |
| 1 | 2.500562000  | -4.090215000 | 0.054538000  |
| 6 | 2.780133000  | 0.520187000  | -0.078290000 |
| 6 | 1.165122000  | 0.145988000  | 1.863139000  |
| 6 | -0.378038000 | -3.045312000 | 1.955354000  |
| 1 | 0.424870000  | -3.577626000 | 2.475939000  |
| 1 | -1.326225000 | -3.504220000 | 2.257666000  |
| 1 | -0.381994000 | -2.007114000 | 2.294560000  |
| 6 | -0.202573000 | -4.604606000 | -0.036427000 |
| 1 | -0.094491000 | -4.700268000 | -1.121827000 |
| 1 | -1.142050000 | -5.093734000 | 0.247983000  |
| 1 | 0.611135000  | -5.165433000 | 0.436004000  |
| 6 | -1.915948000 | 4.135817000  | 0.209145000  |
| 1 | -1.368597000 | 4.942473000  | 0.708250000  |
| 1 | -2.965463000 | 4.217520000  | 0.517396000  |
| 1 | -1.871939000 | 4.313636000  | -0.870179000 |
| 6 | 2.556879000  | 3.981131000  | -0.698814000 |
| 1 | 3.200018000  | 3.099181000  | -0.758776000 |
| 1 | 3.183286000  | 4.826870000  | -0.390619000 |
| 1 | 2.182358000  | 4.202773000  | -1.702370000 |
| 6 | 2.016662000  | 3.592259000  | 1.734872000  |
| 1 | 1.246684000  | 3.478411000  | 2.502338000  |
| 1 | 2.632806000  | 4.458708000  | 2.003262000  |
| 1 | 2.649564000  | 2.699783000  | 1.764079000  |
| 6 | -1.461353000 | 2.535880000  | 2.122186000  |
| 1 | -1.059328000 | 1.563368000  | 2.416020000  |
| 1 | -2.510713000 | 2.584055000  | 2.436754000  |
| 1 | -0.920401000 | 3.311739000  | 2.673555000  |
| 1 | -0.548854000 | -0.130102000 | 0.292653000  |
| 1 | -0.398352000 | -0.034810000 | -2.149888000 |

-2063.355169

### TS8

|   |              |              |             |
|---|--------------|--------------|-------------|
| 1 | -5.057889000 | -1.796719000 | 0.821063000 |
| 1 | -2.378350000 | -0.955815000 | 1.208872000 |
| 7 | -4.579237000 | -2.686816000 | 0.699969000 |
| 1 | -5.249152000 | -3.411347000 | 0.947513000 |

|    |              |              |              |
|----|--------------|--------------|--------------|
| 6  | -4.141902000 | -2.853959000 | -0.695932000 |
| 1  | -4.962227000 | -2.656422000 | -1.409971000 |
| 6  | -3.646636000 | -4.284032000 | -0.918463000 |
| 1  | -2.814013000 | -4.507187000 | -0.246048000 |
| 1  | -4.451822000 | -5.003327000 | -0.732047000 |
| 1  | -3.305534000 | -4.417893000 | -1.950547000 |
| 6  | -3.062560000 | -1.816727000 | -1.032591000 |
| 1  | -2.893338000 | -1.813818000 | -2.114458000 |
| 1  | -3.417133000 | -0.816912000 | -0.746012000 |
| 6  | -1.597190000 | -1.668590000 | 0.910875000  |
| 8  | -1.782985000 | -2.083417000 | -0.440993000 |
| 8  | -1.123595000 | -2.488709000 | 1.715316000  |
| 25 | 0.644218000  | 0.584591000  | 0.125284000  |
| 15 | 2.083717000  | -1.222167000 | -0.095358000 |
| 15 | -1.097367000 | 2.076497000  | -0.091175000 |
| 8  | 2.668239000  | 2.503953000  | -0.794109000 |
| 8  | 1.266984000  | 1.155995000  | 2.939421000  |
| 7  | -0.025550000 | -0.047188000 | -1.838311000 |
| 6  | 1.008507000  | -0.778903000 | -2.608937000 |
| 1  | 1.792133000  | -0.062783000 | -2.872896000 |
| 1  | 0.583513000  | -1.174800000 | -3.542350000 |
| 6  | -0.654593000 | 1.043257000  | -2.623126000 |
| 1  | -1.059737000 | 0.654917000  | -3.568275000 |
| 1  | 0.132198000  | 1.764326000  | -2.865250000 |
| 6  | 1.910938000  | -2.710663000 | 1.021729000  |
| 1  | 0.828548000  | -2.874379000 | 1.011703000  |
| 6  | -0.781945000 | 3.930590000  | -0.080584000 |
| 1  | -1.766562000 | 4.406783000  | -0.020735000 |
| 6  | -1.760136000 | 1.707490000  | -1.799966000 |
| 1  | -2.601122000 | 1.016938000  | -1.687104000 |
| 1  | -2.145541000 | 2.596357000  | -2.305852000 |
| 6  | -2.634691000 | 1.844320000  | 0.966131000  |
| 1  | -2.991530000 | 0.868154000  | 0.619181000  |
| 6  | 1.565008000  | -1.913570000 | -1.748945000 |
| 1  | 2.370878000  | -2.443282000 | -2.263602000 |
| 1  | 0.767788000  | -2.636735000 | -1.542597000 |
| 6  | 4.436260000  | -0.033527000 | 0.920778000  |
| 1  | 4.088363000  | 0.992466000  | 0.778055000  |
| 1  | 5.532711000  | -0.018220000 | 0.930454000  |
| 1  | 4.097488000  | -0.365180000 | 1.904796000  |
| 6  | 4.397597000  | -0.402507000 | -1.582070000 |
| 1  | 4.155958000  | -1.080907000 | -2.405170000 |
| 1  | 5.486440000  | -0.272606000 | -1.574621000 |
| 1  | 3.953165000  | 0.572816000  | -1.796038000 |
| 6  | 3.942601000  | -0.947403000 | -0.217069000 |
| 1  | 4.394524000  | -1.937676000 | -0.085230000 |



|   |              |              |              |
|---|--------------|--------------|--------------|
| 6 | 1.849587000  | 1.732747000  | -0.452581000 |
| 6 | 1.019905000  | 0.933044000  | 1.815696000  |
| 6 | 2.304432000  | -2.416552000 | 2.478100000  |
| 1 | 3.390452000  | -2.332085000 | 2.596544000  |
| 1 | 1.970327000  | -3.242546000 | 3.116845000  |
| 1 | 1.842799000  | -1.499204000 | 2.852108000  |
| 6 | 2.610762000  | -3.980773000 | 0.509567000  |
| 1 | 2.316299000  | -4.241719000 | -0.511411000 |
| 1 | 2.342386000  | -4.825901000 | 1.155113000  |
| 1 | 3.702463000  | -3.888105000 | 0.534796000  |
| 6 | -3.758985000 | 2.860801000  | 0.713455000  |
| 1 | -3.514642000 | 3.841939000  | 1.133755000  |
| 1 | -4.679189000 | 2.517508000  | 1.200459000  |
| 1 | -3.974228000 | 2.989415000  | -0.352716000 |
| 6 | -0.099852000 | 4.439457000  | -1.363089000 |
| 1 | 0.888509000  | 3.998122000  | -1.503427000 |
| 1 | 0.031381000  | 5.525605000  | -1.290082000 |
| 1 | -0.694974000 | 4.245508000  | -2.259955000 |
| 6 | 0.032192000  | 4.324731000  | 1.164459000  |
| 1 | -0.457901000 | 4.027120000  | 2.095483000  |
| 1 | 0.165392000  | 5.412511000  | 1.191527000  |
| 1 | 1.023460000  | 3.862130000  | 1.146439000  |
| 6 | -2.319507000 | 1.705153000  | 2.462578000  |
| 1 | -1.557810000 | 0.942809000  | 2.642704000  |
| 1 | -3.227747000 | 1.417519000  | 3.005031000  |
| 1 | -1.966199000 | 2.647995000  | 2.891523000  |
| 1 | -0.560748000 | -0.574132000 | 0.684753000  |
| 1 | -0.744885000 | -0.731816000 | -1.585202000 |

-2063.332933

## 23

|   |             |             |              |
|---|-------------|-------------|--------------|
| 1 | 4.889441000 | 2.494541000 | 0.614237000  |
| 1 | 2.206015000 | 1.287287000 | 1.110374000  |
| 7 | 4.181772000 | 3.224071000 | 0.671277000  |
| 1 | 4.659402000 | 4.060328000 | 1.000622000  |
| 6 | 3.594165000 | 3.470542000 | -0.659791000 |
| 1 | 4.381443000 | 3.625098000 | -1.420417000 |
| 6 | 2.712355000 | 4.718997000 | -0.616759000 |
| 1 | 1.911723000 | 4.578625000 | 0.113975000  |
| 1 | 3.304732000 | 5.599820000 | -0.343070000 |
| 1 | 2.262177000 | 4.905159000 | -1.598013000 |
| 6 | 2.812908000 | 2.233134000 | -1.137110000 |
| 1 | 2.722583000 | 2.275357000 | -2.228798000 |
| 1 | 3.394656000 | 1.330263000 | -0.892163000 |
| 6 | 1.274658000 | 1.772427000 | 0.771345000  |

|    |              |              |              |
|----|--------------|--------------|--------------|
| 8  | 1.472324000  | 2.113438000  | -0.663603000 |
| 8  | 0.776239000  | 2.695517000  | 1.495254000  |
| 25 | -0.530589000 | -0.638364000 | 0.131037000  |
| 15 | -2.249084000 | 0.915236000  | -0.094192000 |
| 15 | 1.417989000  | -1.881195000 | -0.091571000 |
| 8  | -2.249952000 | -2.860389000 | -0.691413000 |
| 8  | -1.025346000 | -1.260822000 | 2.965787000  |
| 7  | -0.020279000 | 0.001674000  | -1.842446000 |
| 6  | -1.152127000 | 0.579037000  | -2.610004000 |
| 1  | -1.836354000 | -0.235088000 | -2.867566000 |
| 1  | -0.787582000 | 1.018655000  | -3.548917000 |
| 6  | 0.733784000  | -1.008153000 | -2.625498000 |
| 1  | 1.043136000  | -0.589223000 | -3.593106000 |
| 1  | 0.059085000  | -1.846547000 | -2.824481000 |
| 6  | -2.283152000 | 2.413339000  | 1.018770000  |
| 1  | -1.223511000 | 2.700532000  | 1.053041000  |
| 6  | 1.360835000  | -3.757410000 | -0.006572000 |
| 1  | 2.405076000  | -4.082834000 | 0.052836000  |
| 6  | 1.957692000  | -1.470887000 | -1.832123000 |
| 1  | 2.683066000  | -0.653562000 | -1.766932000 |
| 1  | 2.457326000  | -2.305251000 | -2.330504000 |
| 6  | 2.928493000  | -1.393926000 | 0.912115000  |
| 1  | 3.119996000  | -0.380635000 | 0.542624000  |
| 6  | -1.846204000 | 1.642674000  | -1.759261000 |
| 1  | -2.720568000 | 2.055066000  | -2.269376000 |
| 1  | -1.146639000 | 2.464746000  | -1.571751000 |
| 6  | -4.384115000 | -0.612813000 | 0.964508000  |
| 1  | -3.864351000 | -1.566638000 | 0.848913000  |
| 1  | -5.461468000 | -0.816297000 | 0.961516000  |
| 1  | -4.124655000 | -0.208795000 | 1.944953000  |
| 6  | -4.418623000 | -0.275251000 | -1.542339000 |
| 1  | -4.281628000 | 0.417904000  | -2.376902000 |
| 1  | -5.477050000 | -0.560732000 | -1.525142000 |
| 1  | -3.839299000 | -1.179966000 | -1.744264000 |
| 6  | -4.041451000 | 0.350125000  | -0.188303000 |
| 1  | -4.634979000 | 1.263931000  | -0.062883000 |
| 6  | -1.553805000 | -1.972180000 | -0.374451000 |
| 6  | -0.822880000 | -1.008998000 | 1.842702000  |
| 6  | -2.706780000 | 2.076897000  | 2.457717000  |
| 1  | -3.781340000 | 1.876154000  | 2.528570000  |
| 1  | -2.491881000 | 2.934932000  | 3.105258000  |
| 1  | -2.165940000 | 1.215530000  | 2.859050000  |
| 6  | -3.104496000 | 3.591055000  | 0.467450000  |
| 1  | -2.774365000 | 3.907305000  | -0.526543000 |
| 1  | -2.991939000 | 4.451642000  | 1.137974000  |
| 1  | -4.174774000 | 3.360199000  | 0.413286000  |

|   |              |              |              |
|---|--------------|--------------|--------------|
| 6 | 4.186396000  | -2.231111000 | 0.632213000  |
| 1 | 4.113154000  | -3.230147000 | 1.073962000  |
| 1 | 5.057410000  | -1.739535000 | 1.080670000  |
| 1 | 4.382537000  | -2.344110000 | -0.439152000 |
| 6 | 0.745724000  | -4.409740000 | -1.257777000 |
| 1 | -0.297598000 | -4.122492000 | -1.401910000 |
| 1 | 0.773460000  | -5.499254000 | -1.139277000 |
| 1 | 1.299477000  | -4.169288000 | -2.169458000 |
| 6 | 0.630049000  | -4.215217000 | 1.267670000  |
| 1 | 1.073283000  | -3.798194000 | 2.175599000  |
| 1 | 0.674424000  | -5.307530000 | 1.346231000  |
| 1 | -0.423147000 | -3.921116000 | 1.243886000  |
| 6 | 2.639898000  | -1.282607000 | 2.416670000  |
| 1 | 1.773239000  | -0.647544000 | 2.616553000  |
| 1 | 3.506307000  | -0.843192000 | 2.924220000  |
| 1 | 2.456846000  | -2.262307000 | 2.869077000  |
| 1 | 0.507215000  | 0.809308000  | 0.655592000  |
| 1 | 0.616483000  | 0.784613000  | -1.618923000 |

-2063.335687

**TS9**

|    |              |              |              |
|----|--------------|--------------|--------------|
| 1  | -4.717754000 | -1.380488000 | -0.045510000 |
| 1  | -2.311885000 | -1.906457000 | 1.444675000  |
| 7  | -4.302947000 | -2.255349000 | 0.270284000  |
| 1  | -5.064280000 | -2.800863000 | 0.670149000  |
| 6  | -3.718599000 | -2.976026000 | -0.883300000 |
| 1  | -4.486275000 | -3.158653000 | -1.659997000 |
| 6  | -3.186968000 | -4.335192000 | -0.425463000 |
| 1  | -2.396640000 | -4.215615000 | 0.317902000  |
| 1  | -3.990297000 | -4.941748000 | 0.012098000  |
| 1  | -2.780553000 | -4.887711000 | -1.280673000 |
| 6  | -2.640056000 | -2.111490000 | -1.574883000 |
| 1  | -2.388906000 | -2.652418000 | -2.514393000 |
| 1  | -3.173470000 | -1.189542000 | -1.911490000 |
| 6  | -1.235285000 | -2.107480000 | 1.505048000  |
| 8  | -1.502210000 | -1.812677000 | -0.840612000 |
| 8  | -0.777269000 | -3.196020000 | 1.827566000  |
| 25 | 0.630163000  | 0.679659000  | 0.081316000  |
| 15 | 2.314100000  | -0.914267000 | -0.177589000 |
| 15 | -1.401934000 | 1.798549000  | -0.051846000 |
| 8  | 2.243477000  | 2.969277000  | -0.727839000 |
| 8  | 1.189645000  | 1.303552000  | 2.908776000  |
| 7  | 0.075224000  | 0.038802000  | -1.834205000 |
| 6  | 1.159881000  | -0.551785000 | -2.651247000 |
| 1  | 1.845807000  | 0.248000000  | -2.952384000 |

|   |              |              |              |
|---|--------------|--------------|--------------|
| 1 | 0.743037000  | -0.993110000 | -3.567972000 |
| 6 | -0.695082000 | 1.038193000  | -2.611439000 |
| 1 | -1.016329000 | 0.606202000  | -3.570077000 |
| 1 | -0.036803000 | 1.885352000  | -2.836312000 |
| 6 | 2.284367000  | -2.433895000 | 0.913752000  |
| 1 | 1.253610000  | -2.783769000 | 0.790939000  |
| 6 | -1.509323000 | 3.643583000  | 0.253363000  |
| 1 | -2.576679000 | 3.870949000  | 0.361883000  |
| 6 | -1.917875000 | 1.495212000  | -1.814700000 |
| 1 | -2.659523000 | 0.692751000  | -1.796296000 |
| 1 | -2.389086000 | 2.368062000  | -2.271743000 |
| 6 | -2.798090000 | 0.994674000  | 0.900721000  |
| 1 | -2.734481000 | -0.028314000 | 0.509521000  |
| 6 | 1.888800000  | -1.622751000 | -1.841652000 |
| 1 | 2.759422000  | -2.011570000 | -2.376104000 |
| 1 | 1.203205000  | -2.455279000 | -1.650695000 |
| 6 | 4.456681000  | 0.541784000  | 0.933096000  |
| 1 | 3.924433000  | 1.495427000  | 0.876536000  |
| 1 | 5.531436000  | 0.756607000  | 0.925274000  |
| 1 | 4.215539000  | 0.081515000  | 1.893877000  |
| 6 | 4.446978000  | 0.337304000  | -1.591223000 |
| 1 | 4.298542000  | -0.314478000 | -2.456499000 |
| 1 | 5.502958000  | 0.631040000  | -1.579582000 |
| 1 | 3.855595000  | 1.245065000  | -1.736628000 |
| 6 | 4.103942000  | -0.360685000 | -0.263178000 |
| 1 | 4.700805000  | -1.277971000 | -0.199704000 |
| 6 | 1.601522000  | 2.049369000  | -0.394156000 |
| 6 | 0.955659000  | 1.040843000  | 1.795816000  |
| 6 | 2.484932000  | -2.127869000 | 2.405031000  |
| 1 | 3.519763000  | -1.846969000 | 2.626699000  |
| 1 | 2.255538000  | -3.025687000 | 2.989176000  |
| 1 | 1.828027000  | -1.328230000 | 2.754568000  |
| 6 | 3.229195000  | -3.554002000 | 0.445866000  |
| 1 | 3.092471000  | -3.807157000 | -0.609790000 |
| 1 | 3.030416000  | -4.459444000 | 1.031078000  |
| 1 | 4.280677000  | -3.289566000 | 0.601338000  |
| 6 | -4.189663000 | 1.560013000  | 0.574729000  |
| 1 | -4.318459000 | 2.572517000  | 0.972708000  |
| 1 | -4.954952000 | 0.928363000  | 1.041540000  |
| 1 | -4.393449000 | 1.587680000  | -0.499965000 |
| 6 | -0.956820000 | 4.470359000  | -0.921212000 |
| 1 | 0.096317000  | 4.246901000  | -1.111044000 |
| 1 | -1.029594000 | 5.535967000  | -0.675065000 |
| 1 | -1.514982000 | 4.311362000  | -1.847728000 |
| 6 | -0.785522000 | 4.014521000  | 1.560102000  |
| 1 | -1.138388000 | 3.436771000  | 2.417631000  |

|   |              |              |              |
|---|--------------|--------------|--------------|
| 1 | -0.946046000 | 5.075840000  | 1.781026000  |
| 1 | 0.292221000  | 3.849265000  | 1.467850000  |
| 6 | -2.569141000 | 0.944634000  | 2.418371000  |
| 1 | -1.570332000 | 0.585643000  | 2.677365000  |
| 1 | -3.298711000 | 0.263354000  | 2.870800000  |
| 1 | -2.707970000 | 1.926901000  | 2.881392000  |
| 1 | -0.561026000 | -1.231274000 | 1.371532000  |
| 1 | -0.601802000 | -0.764030000 | -1.525615000 |

-2063.325443

**24**

|    |              |              |              |
|----|--------------|--------------|--------------|
| 1  | -4.636532000 | -1.211539000 | -0.489151000 |
| 1  | -2.430091000 | -1.923676000 | 1.579143000  |
| 7  | -4.289746000 | -2.066656000 | -0.058549000 |
| 1  | -5.100532000 | -2.525536000 | 0.351771000  |
| 6  | -3.683794000 | -2.944066000 | -1.080824000 |
| 1  | -4.394782000 | -3.162453000 | -1.898014000 |
| 6  | -3.277871000 | -4.275371000 | -0.442030000 |
| 1  | -2.540549000 | -4.121463000 | 0.348949000  |
| 1  | -4.151125000 | -4.777138000 | -0.008887000 |
| 1  | -2.847294000 | -4.943640000 | -1.195877000 |
| 6  | -2.501993000 | -2.239975000 | -1.753472000 |
| 1  | -2.148723000 | -2.878733000 | -2.578873000 |
| 1  | -2.859224000 | -1.301183000 | -2.203910000 |
| 6  | -1.387714000 | -2.142594000 | 1.859868000  |
| 8  | -1.447713000 | -1.983734000 | -0.836039000 |
| 8  | -1.044723000 | -3.226691000 | 2.300648000  |
| 25 | 0.677357000  | 0.730169000  | 0.018623000  |
| 15 | 2.268789000  | -0.942315000 | -0.216931000 |
| 15 | -1.330953000 | 1.873044000  | -0.051067000 |
| 8  | 2.427220000  | 2.993174000  | -0.524847000 |
| 8  | 1.089358000  | 1.109175000  | 2.917312000  |
| 7  | 0.136100000  | 0.156205000  | -1.774763000 |
| 6  | 1.087077000  | -0.540760000 | -2.656980000 |
| 1  | 1.800547000  | 0.175250000  | -3.099705000 |
| 1  | 0.550068000  | -1.003498000 | -3.501624000 |
| 6  | -0.720321000 | 1.035593000  | -2.588542000 |
| 1  | -1.082221000 | 0.498619000  | -3.480741000 |
| 1  | -0.139058000 | 1.896574000  | -2.959968000 |
| 6  | 2.117916000  | -2.474064000 | 0.863010000  |
| 1  | 1.064969000  | -2.742711000 | 0.714315000  |
| 6  | -1.396647000 | 3.730267000  | 0.176928000  |
| 1  | -2.456998000 | 4.002015000  | 0.247315000  |
| 6  | -1.921186000 | 1.522012000  | -1.777951000 |
| 1  | -2.660976000 | 0.720694000  | -1.702994000 |

|   |              |              |              |
|---|--------------|--------------|--------------|
| 1 | -2.415757000 | 2.380122000  | -2.240501000 |
| 6 | -2.734910000 | 1.143484000  | 0.963577000  |
| 1 | -2.723709000 | 0.102229000  | 0.615346000  |
| 6 | 1.832178000  | -1.628675000 | -1.885307000 |
| 1 | 2.700844000  | -2.007592000 | -2.430828000 |
| 1 | 1.153368000  | -2.468118000 | -1.702905000 |
| 6 | 4.502678000  | 0.298267000  | 0.968468000  |
| 1 | 3.994386000  | 1.266579000  | 0.988426000  |
| 1 | 5.582811000  | 0.484513000  | 0.945349000  |
| 1 | 4.273642000  | -0.218251000 | 1.903266000  |
| 6 | 4.458334000  | 0.243626000  | -1.561925000 |
| 1 | 4.262955000  | -0.345671000 | -2.462001000 |
| 1 | 5.528357000  | 0.482145000  | -1.549847000 |
| 1 | 3.910172000  | 1.186127000  | -1.642476000 |
| 6 | 4.091529000  | -0.513870000 | -0.272980000 |
| 1 | 4.634052000  | -1.467095000 | -0.269555000 |
| 6 | 1.726698000  | 2.084432000  | -0.271135000 |
| 6 | 0.903197000  | 0.926656000  | 1.772832000  |
| 6 | 2.326749000  | -2.219048000 | 2.363025000  |
| 1 | 3.378912000  | -2.023085000 | 2.593644000  |
| 1 | 2.026396000  | -3.110006000 | 2.924918000  |
| 1 | 1.734364000  | -1.378945000 | 2.729417000  |
| 6 | 2.984928000  | -3.653485000 | 0.388339000  |
| 1 | 2.843812000  | -3.883665000 | -0.671845000 |
| 1 | 2.721380000  | -4.551022000 | 0.960291000  |
| 1 | 4.049926000  | -3.460274000 | 0.556939000  |
| 6 | -4.114331000 | 1.741538000  | 0.638327000  |
| 1 | -4.205438000 | 2.765668000  | 1.016437000  |
| 1 | -4.894278000 | 1.142900000  | 1.123957000  |
| 1 | -4.328712000 | 1.756650000  | -0.434649000 |
| 6 | -0.783223000 | 4.471746000  | -1.024634000 |
| 1 | 0.266841000  | 4.202371000  | -1.166386000 |
| 1 | -0.827728000 | 5.552137000  | -0.844135000 |
| 1 | -1.317054000 | 4.273076000  | -1.958002000 |
| 6 | -0.686434000 | 4.137536000  | 1.480127000  |
| 1 | -1.111099000 | 3.649126000  | 2.360458000  |
| 1 | -0.770971000 | 5.220886000  | 1.624418000  |
| 1 | 0.377203000  | 3.883624000  | 1.437333000  |
| 6 | -2.494600000 | 1.136573000  | 2.480356000  |
| 1 | -1.515219000 | 0.734784000  | 2.745695000  |
| 1 | -3.257740000 | 0.516381000  | 2.965246000  |
| 1 | -2.574236000 | 2.142003000  | 2.905711000  |
| 1 | -0.652863000 | -1.327716000 | 1.716188000  |
| 1 | -0.900729000 | -1.217777000 | -1.165122000 |

-2063.337783

**25**

|   |              |              |              |
|---|--------------|--------------|--------------|
| 1 | 1.116258000  | -0.940550000 | 0.000004000  |
| 6 | 0.534818000  | -0.000018000 | -0.000002000 |
| 8 | -0.680181000 | 0.000006000  | 0.000000000  |
| 1 | 1.116276000  | 0.940616000  | 0.000004000  |

-114.511981

**26**

|    |              |              |              |
|----|--------------|--------------|--------------|
| 1  | -4.314748000 | 1.986410000  | -0.575249000 |
| 1  | -2.528310000 | 0.700588000  | 0.968575000  |
| 7  | -4.864096000 | 1.333534000  | -0.020370000 |
| 1  | -5.771047000 | 1.770237000  | 0.124536000  |
| 6  | -5.018974000 | 0.052320000  | -0.730329000 |
| 1  | -5.267431000 | 0.195578000  | -1.795803000 |
| 6  | -6.132958000 | -0.771591000 | -0.080056000 |
| 1  | -5.914554000 | -0.945625000 | 0.977790000  |
| 1  | -7.091864000 | -0.247831000 | -0.155183000 |
| 1  | -6.236417000 | -1.741174000 | -0.577563000 |
| 6  | -3.682828000 | -0.693374000 | -0.726375000 |
| 1  | -3.749549000 | -1.602244000 | -1.326463000 |
| 1  | -2.868828000 | -0.076103000 | -1.122190000 |
| 6  | -2.664676000 | -0.298222000 | 1.390054000  |
| 8  | -3.316404000 | -1.156338000 | 0.601148000  |
| 8  | -2.270168000 | -0.627476000 | 2.495863000  |
| 25 | 1.003576000  | 0.072850000  | -0.199637000 |
| 15 | 0.624318000  | 2.297833000  | 0.154585000  |
| 15 | 0.879493000  | -2.190042000 | 0.082207000  |
| 8  | 3.948817000  | 0.217114000  | -0.255733000 |
| 8  | 0.848786000  | 0.096957000  | -3.124813000 |
| 7  | 0.797187000  | 0.031643000  | 2.062392000  |
| 6  | 1.285803000  | 1.290408000  | 2.662016000  |
| 1  | 2.360051000  | 1.357309000  | 2.464147000  |
| 1  | 1.139118000  | 1.290811000  | 3.752540000  |
| 6  | 1.399439000  | -1.194352000 | 2.626922000  |
| 1  | 1.242399000  | -1.243460000 | 3.714927000  |
| 1  | 2.477177000  | -1.152602000 | 2.441405000  |
| 6  | -1.043125000 | 3.013731000  | -0.343178000 |
| 1  | -1.719052000 | 2.409975000  | 0.275154000  |
| 6  | 2.299017000  | -3.306719000 | -0.451163000 |
| 1  | 1.924653000  | -4.336051000 | -0.404561000 |
| 6  | 0.768133000  | -2.408584000 | 1.939272000  |
| 1  | -0.297027000 | -2.450831000 | 2.194522000  |
| 1  | 1.224986000  | -3.341391000 | 2.280846000  |
| 6  | -0.672333000 | -3.081164000 | -0.480469000 |

|   |              |              |              |
|---|--------------|--------------|--------------|
| 1 | -1.439462000 | -2.531345000 | 0.074114000  |
| 6 | 0.539167000  | 2.464313000  | 2.020541000  |
| 1 | 0.929462000  | 3.422619000  | 2.373345000  |
| 1 | -0.518022000 | 2.424760000  | 2.308468000  |
| 6 | 2.251881000  | 3.389162000  | -1.855488000 |
| 1 | 2.709770000  | 2.406210000  | -2.006097000 |
| 1 | 2.970609000  | 4.154433000  | -2.171381000 |
| 1 | 1.382770000  | 3.455722000  | -2.515599000 |
| 6 | 3.153712000  | 3.566804000  | 0.496443000  |
| 1 | 2.944645000  | 3.774249000  | 1.549900000  |
| 1 | 3.848922000  | 4.338394000  | 0.144533000  |
| 1 | 3.666395000  | 2.604519000  | 0.431256000  |
| 6 | 1.885253000  | 3.590922000  | -0.374637000 |
| 1 | 1.412426000  | 4.572550000  | -0.253903000 |
| 6 | 2.772589000  | 0.163639000  | -0.183286000 |
| 6 | 0.927753000  | 0.088788000  | -1.949997000 |
| 6 | -1.399793000 | 2.739334000  | -1.810729000 |
| 1 | -0.785693000 | 3.334779000  | -2.493749000 |
| 1 | -2.446355000 | 3.010329000  | -1.998384000 |
| 1 | -1.264664000 | 1.683890000  | -2.057857000 |
| 6 | -1.259751000 | 4.489541000  | 0.024802000  |
| 1 | -0.990506000 | 4.704084000  | 1.064334000  |
| 1 | -2.316209000 | 4.752539000  | -0.107337000 |
| 1 | -0.676211000 | 5.152997000  | -0.622207000 |
| 6 | -0.756582000 | -4.563061000 | -0.080267000 |
| 1 | -0.061861000 | -5.179839000 | -0.660471000 |
| 1 | -1.767838000 | -4.939311000 | -0.277698000 |
| 1 | -0.546008000 | -4.722424000 | 0.982630000  |
| 6 | 3.521201000  | -3.203587000 | 0.478661000  |
| 1 | 3.928350000  | -2.189486000 | 0.494316000  |
| 1 | 4.311107000  | -3.871573000 | 0.114396000  |
| 1 | 3.293164000  | -3.499426000 | 1.506673000  |
| 6 | 2.707641000  | -2.992369000 | -1.901409000 |
| 1 | 1.870962000  | -3.068479000 | -2.600717000 |
| 1 | 3.484164000  | -3.693574000 | -2.230285000 |
| 1 | 3.111802000  | -1.978411000 | -1.975919000 |
| 6 | -0.967591000 | -2.889818000 | -1.975701000 |
| 1 | -0.936544000 | -1.834601000 | -2.257050000 |
| 1 | -1.967404000 | -3.277813000 | -2.206270000 |
| 1 | -0.256291000 | -3.436677000 | -2.603376000 |
| 1 | -0.637427000 | -0.031250000 | -0.237950000 |
| 1 | -0.207914000 | -0.024610000 | 2.234292000  |

-2063.358352

**TS10**



|    |              |              |              |
|----|--------------|--------------|--------------|
| 1  | 3.028421000  | 2.935890000  | -1.094184000 |
| 1  | 1.674467000  | 1.990419000  | 1.022409000  |
| 7  | 2.841193000  | 3.637984000  | -0.382118000 |
| 1  | 3.640322000  | 4.268186000  | -0.385530000 |
| 6  | 1.610418000  | 4.379090000  | -0.714231000 |
| 1  | 1.619394000  | 4.731524000  | -1.761061000 |
| 6  | 1.479854000  | 5.598363000  | 0.200608000  |
| 1  | 1.451065000  | 5.287107000  | 1.249009000  |
| 1  | 2.327595000  | 6.278410000  | 0.061369000  |
| 1  | 0.561455000  | 6.151700000  | -0.021691000 |
| 6  | 0.388557000  | 3.457226000  | -0.617060000 |
| 1  | -0.474081000 | 3.963602000  | -1.057169000 |
| 1  | 0.555043000  | 2.524515000  | -1.172000000 |
| 6  | 0.628082000  | 2.071862000  | 1.334087000  |
| 8  | -0.011259000 | 3.140562000  | 0.726789000  |
| 8  | 0.254104000  | 1.764241000  | 2.489393000  |
| 25 | -0.224575000 | -0.702391000 | -0.160835000 |
| 15 | 1.986966000  | -1.279119000 | 0.175940000  |
| 15 | -2.408911000 | 0.002293000  | 0.114877000  |
| 8  | -1.018676000 | -3.453343000 | -0.815772000 |
| 8  | 0.055347000  | 0.086150000  | -2.976709000 |
| 7  | -0.340265000 | -0.970004000 | 1.998288000  |
| 6  | 0.675004000  | -1.904682000 | 2.533985000  |
| 1  | 0.421873000  | -2.913678000 | 2.194104000  |
| 1  | 0.654922000  | -1.905966000 | 3.633454000  |
| 6  | -1.710251000 | -1.255937000 | 2.482088000  |
| 1  | -1.732603000 | -1.281357000 | 3.581318000  |
| 1  | -2.002995000 | -2.245627000 | 2.117814000  |
| 6  | 3.365601000  | -0.041724000 | -0.139304000 |
| 1  | 2.983166000  | 0.870181000  | 0.329679000  |
| 6  | -3.817804000 | -0.954408000 | -0.690087000 |
| 1  | -4.692418000 | -0.294498000 | -0.643962000 |
| 6  | -2.649094000 | -0.168628000 | 1.957387000  |
| 1  | -2.356156000 | 0.793165000  | 2.393512000  |
| 1  | -3.687209000 | -0.361982000 | 2.238924000  |
| 6  | -2.859090000 | 1.798555000  | -0.167371000 |
| 1  | -2.059694000 | 2.315786000  | 0.372117000  |
| 6  | 2.056835000  | -1.482020000 | 2.030076000  |
| 1  | 2.832815000  | -2.180157000 | 2.354855000  |
| 1  | 2.304614000  | -0.497701000 | 2.444166000  |
| 6  | 2.288199000  | -3.021868000 | -2.034138000 |
| 1  | 1.214371000  | -3.186706000 | -2.148401000 |
| 1  | 2.809146000  | -3.885509000 | -2.464359000 |
| 1  | 2.552769000  | -2.143238000 | -2.626591000 |
| 6  | 2.235940000  | -4.133712000 | 0.234375000  |
| 1  | 2.574287000  | -4.116563000 | 1.273982000  |

|   |              |              |              |
|---|--------------|--------------|--------------|
| 1 | 2.672802000  | -5.021997000 | -0.237107000 |
| 1 | 1.150217000  | -4.258902000 | 0.225576000  |
| 6 | 2.668633000  | -2.881088000 | -0.547861000 |
| 1 | 3.759690000  | -2.801751000 | -0.475497000 |
| 6 | -0.700938000 | -2.354955000 | -0.542687000 |
| 6 | -0.061172000 | -0.238513000 | -1.854401000 |
| 6 | 3.560224000  | 0.251186000  | -1.635432000 |
| 1 | 4.001549000  | -0.605022000 | -2.155172000 |
| 1 | 4.256070000  | 1.089529000  | -1.760389000 |
| 1 | 2.620457000  | 0.507192000  | -2.132753000 |
| 6 | 4.705887000  | -0.386289000 | 0.531100000  |
| 1 | 4.607237000  | -0.544893000 | 1.608741000  |
| 1 | 5.409038000  | 0.442056000  | 0.382927000  |
| 1 | 5.162137000  | -1.281541000 | 0.095360000  |
| 6 | -4.208549000 | 2.224679000  | 0.434730000  |
| 1 | -5.053306000 | 1.755241000  | -0.081491000 |
| 1 | -4.326441000 | 3.309990000  | 0.328681000  |
| 1 | -4.287237000 | 1.987822000  | 1.499751000  |
| 6 | -4.171158000 | -2.257101000 | 0.048346000  |
| 1 | -3.326108000 | -2.949867000 | 0.071707000  |
| 1 | -4.993011000 | -2.758900000 | -0.476395000 |
| 1 | -4.500815000 | -2.079479000 | 1.075774000  |
| 6 | -3.502509000 | -1.242253000 | -2.170262000 |
| 1 | -3.231551000 | -0.341409000 | -2.725548000 |
| 1 | -4.381212000 | -1.684175000 | -2.655039000 |
| 1 | -2.674473000 | -1.949733000 | -2.264013000 |
| 6 | -2.770104000 | 2.202990000  | -1.647850000 |
| 1 | -1.829061000 | 1.887077000  | -2.105072000 |
| 1 | -2.839234000 | 3.293652000  | -1.735847000 |
| 1 | -3.595900000 | 1.779007000  | -2.229217000 |
| 1 | 0.221819000  | 0.924472000  | 0.313298000  |
| 1 | -0.097711000 | -0.025080000 | 2.339204000  |

-2063.341988

**27**

|   |              |             |              |
|---|--------------|-------------|--------------|
| 1 | 0.266949000  | 4.521459000 | -0.957830000 |
| 1 | 0.177955000  | 2.645221000 | 0.776130000  |
| 7 | -0.393563000 | 4.870682000 | -0.266593000 |
| 1 | -0.309289000 | 5.885173000 | -0.277717000 |
| 6 | -1.767275000 | 4.472469000 | -0.626519000 |
| 1 | -2.013723000 | 4.756382000 | -1.666352000 |
| 6 | -2.764420000 | 5.164134000 | 0.306118000  |
| 1 | -2.584871000 | 4.865008000 | 1.342955000  |
| 1 | -2.673209000 | 6.254082000 | 0.234230000  |
| 1 | -3.791882000 | 4.892537000 | 0.039561000  |

|    |              |              |              |
|----|--------------|--------------|--------------|
| 6  | -1.919840000 | 2.944448000  | -0.578100000 |
| 1  | -2.903269000 | 2.686351000  | -0.984433000 |
| 1  | -1.167404000 | 2.465320000  | -1.222780000 |
| 6  | -0.566173000 | 1.921024000  | 1.144689000  |
| 8  | -1.863640000 | 2.393879000  | 0.737816000  |
| 8  | -0.504155000 | 1.577601000  | 2.391443000  |
| 25 | 0.296932000  | -0.676269000 | -0.136478000 |
| 15 | 2.441274000  | 0.185730000  | 0.173572000  |
| 15 | -1.883540000 | -1.449650000 | 0.131976000  |
| 8  | 1.274099000  | -3.348706000 | -0.818661000 |
| 8  | 0.034837000  | 0.027511000  | -2.983717000 |
| 7  | 0.383258000  | -0.933296000 | 1.964344000  |
| 6  | 1.751097000  | -1.102231000 | 2.514772000  |
| 1  | 2.135336000  | -2.074773000 | 2.190646000  |
| 1  | 1.719352000  | -1.105176000 | 3.613500000  |
| 6  | -0.561375000 | -1.940729000 | 2.504406000  |
| 1  | -0.554406000 | -1.914403000 | 3.603335000  |
| 1  | -0.223768000 | -2.934966000 | 2.193974000  |
| 6  | 2.763376000  | 2.014742000  | -0.114603000 |
| 1  | 2.085558000  | 2.477707000  | 0.610693000  |
| 6  | -2.404422000 | -3.103143000 | -0.597728000 |
| 1  | -3.498958000 | -3.111792000 | -0.535013000 |
| 6  | -1.965202000 | -1.639721000 | 1.980893000  |
| 1  | -2.290455000 | -0.668596000 | 2.371326000  |
| 1  | -2.687718000 | -2.393334000 | 2.304170000  |
| 6  | -3.330467000 | -0.314613000 | -0.219394000 |
| 1  | -3.017588000 | 0.603082000  | 0.288868000  |
| 6  | 2.643179000  | 0.038502000  | 2.019965000  |
| 1  | 3.682754000  | -0.105318000 | 2.325731000  |
| 1  | 2.291748000  | 0.982244000  | 2.450103000  |
| 6  | 3.712976000  | -0.919388000 | -2.084014000 |
| 1  | 2.870575000  | -1.591663000 | -2.267728000 |
| 1  | 4.610695000  | -1.374307000 | -2.518381000 |
| 1  | 3.518898000  | 0.012049000  | -2.621857000 |
| 6  | 4.274674000  | -2.011809000 | 0.136877000  |
| 1  | 4.513952000  | -1.861811000 | 1.193314000  |
| 1  | 5.160900000  | -2.448462000 | -0.338433000 |
| 1  | 3.470071000  | -2.746026000 | 0.066108000  |
| 6  | 3.923424000  | -0.693845000 | -0.576360000 |
| 1  | 4.771843000  | -0.014501000 | -0.440946000 |
| 6  | 0.889826000  | -2.276505000 | -0.542058000 |
| 6  | 0.138622000  | -0.242000000 | -1.849880000 |
| 6  | 2.342661000  | 2.488831000  | -1.513805000 |
| 1  | 2.987404000  | 2.073732000  | -2.294654000 |
| 1  | 2.426518000  | 3.580246000  | -1.572342000 |
| 1  | 1.312053000  | 2.210360000  | -1.746774000 |

|   |              |              |              |
|---|--------------|--------------|--------------|
| 6 | 4.189697000  | 2.476113000  | 0.227517000  |
| 1 | 4.520254000  | 2.120874000  | 1.208905000  |
| 1 | 4.222816000  | 3.571683000  | 0.241941000  |
| 1 | 4.913770000  | 2.138776000  | -0.521278000 |
| 6 | -4.665398000 | -0.774759000 | 0.391320000  |
| 1 | -5.056474000 | -1.668761000 | -0.106284000 |
| 1 | -5.410292000 | 0.020041000  | 0.263647000  |
| 1 | -4.589676000 | -0.985194000 | 1.461926000  |
| 6 | -1.882687000 | -4.317324000 | 0.191050000  |
| 1 | -0.790765000 | -4.363506000 | 0.189287000  |
| 1 | -2.250904000 | -5.236206000 | -0.280462000 |
| 1 | -2.227938000 | -4.321861000 | 1.228633000  |
| 6 | -2.004104000 | -3.209081000 | -2.081962000 |
| 1 | -2.324179000 | -2.346002000 | -2.669799000 |
| 1 | -2.463332000 | -4.102653000 | -2.520914000 |
| 1 | -0.921177000 | -3.302809000 | -2.191928000 |
| 6 | -3.493240000 | -0.008111000 | -1.717209000 |
| 1 | -2.554917000 | 0.308310000  | -2.179411000 |
| 1 | -4.221379000 | 0.800064000  | -1.850730000 |
| 1 | -3.872175000 | -0.876676000 | -2.265778000 |
| 1 | -0.374756000 | 0.967776000  | 0.376717000  |
| 1 | 0.039215000  | 0.009809000  | 2.289696000  |

-2063.349477

### TS11

|    |              |              |              |
|----|--------------|--------------|--------------|
| 1  | 1.968341000  | 3.035412000  | -1.665546000 |
| 1  | 1.492674000  | 2.450515000  | 1.190716000  |
| 7  | 2.089654000  | 3.686955000  | -0.892927000 |
| 1  | 2.874060000  | 4.284965000  | -1.144236000 |
| 6  | 0.871763000  | 4.500733000  | -0.712677000 |
| 1  | 0.604478000  | 5.034254000  | -1.642757000 |
| 6  | 1.104265000  | 5.539251000  | 0.385506000  |
| 1  | 1.338591000  | 5.046656000  | 1.333698000  |
| 1  | 1.936312000  | 6.201362000  | 0.121012000  |
| 1  | 0.210906000  | 6.156159000  | 0.528496000  |
| 6  | -0.341071000 | 3.605627000  | -0.407125000 |
| 1  | -1.251742000 | 4.191523000  | -0.564523000 |
| 1  | -0.361175000 | 2.760811000  | -1.113763000 |
| 6  | 0.467143000  | 2.065972000  | 1.264506000  |
| 8  | -0.444438000 | 3.116487000  | 0.931452000  |
| 8  | 0.175014000  | 1.538301000  | 2.475890000  |
| 25 | -0.122895000 | -0.718451000 | -0.129280000 |
| 15 | 2.164538000  | -1.006987000 | 0.174230000  |
| 15 | -2.406682000 | -0.293889000 | 0.113965000  |
| 8  | -0.546982000 | -3.514062000 | -0.829827000 |

|   |              |              |              |
|---|--------------|--------------|--------------|
| 8 | 0.027570000  | 0.140773000  | -2.946088000 |
| 7 | -0.194107000 | -0.882667000 | 1.894928000  |
| 6 | 0.924151000  | -1.586752000 | 2.554323000  |
| 1 | 0.844255000  | -2.670420000 | 2.383676000  |
| 1 | 0.877207000  | -1.432119000 | 3.644310000  |
| 6 | -1.477280000 | -1.307576000 | 2.487209000  |
| 1 | -1.434844000 | -1.223972000 | 3.585063000  |
| 1 | -1.672137000 | -2.365266000 | 2.255192000  |
| 6 | 3.337451000  | 0.390504000  | -0.271350000 |
| 1 | 2.818910000  | 1.273933000  | 0.113378000  |
| 6 | -3.660672000 | -1.470546000 | -0.645548000 |
| 1 | -4.623338000 | -0.949774000 | -0.580825000 |
| 6 | -2.603677000 | -0.421000000 | 1.955722000  |
| 1 | -2.476552000 | 0.593308000  | 2.347821000  |
| 1 | -3.591810000 | -0.777988000 | 2.257365000  |
| 6 | -3.089455000 | 1.414700000  | -0.243857000 |
| 1 | -2.365949000 | 2.053048000  | 0.273737000  |
| 6 | 2.258873000  | -1.055240000 | 2.028000000  |
| 1 | 3.109281000  | -1.633948000 | 2.398595000  |
| 1 | 2.384564000  | -0.018678000 | 2.358288000  |
| 6 | 2.718543000  | -2.824724000 | -1.930175000 |
| 1 | 1.684636000  | -3.150893000 | -2.065574000 |
| 1 | 3.371272000  | -3.625464000 | -2.297242000 |
| 1 | 2.877443000  | -1.949078000 | -2.562311000 |
| 6 | 2.703592000  | -3.801115000 | 0.402091000  |
| 1 | 3.016789000  | -3.692149000 | 1.443763000  |
| 1 | 3.236041000  | -4.665386000 | -0.012173000 |
| 1 | 1.635510000  | -4.033395000 | 0.384451000  |
| 6 | 3.026816000  | -2.556746000 | -0.444180000 |
| 1 | 4.099289000  | -2.350078000 | -0.343810000 |
| 6 | -0.379046000 | -2.381647000 | -0.574545000 |
| 6 | -0.027887000 | -0.191925000 | -1.823821000 |
| 6 | 3.504604000  | 0.588484000  | -1.786469000 |
| 1 | 4.120435000  | -0.201239000 | -2.228472000 |
| 1 | 4.016428000  | 1.539850000  | -1.971449000 |
| 1 | 2.546891000  | 0.612310000  | -2.313026000 |
| 6 | 4.708998000  | 0.304662000  | 0.419960000  |
| 1 | 4.626696000  | 0.224561000  | 1.507494000  |
| 1 | 5.282753000  | 1.212520000  | 0.198272000  |
| 1 | 5.295093000  | -0.547143000 | 0.058109000  |
| 6 | -4.477374000 | 1.681718000  | 0.365431000  |
| 1 | -5.256376000 | 1.081488000  | -0.116982000 |
| 1 | -4.739675000 | 2.735782000  | 0.214611000  |
| 1 | -4.512237000 | 1.485360000  | 1.440808000  |
| 6 | -3.792124000 | -2.795502000 | 0.126920000  |
| 1 | -2.850012000 | -3.348424000 | 0.146466000  |

|   |              |              |              |
|---|--------------|--------------|--------------|
| 1 | -4.536402000 | -3.428718000 | -0.370329000 |
| 1 | -4.125083000 | -2.646659000 | 1.157557000  |
| 6 | -3.351999000 | -1.736844000 | -2.131143000 |
| 1 | -3.213350000 | -0.818488000 | -2.705908000 |
| 1 | -4.183216000 | -2.291831000 | -2.581873000 |
| 1 | -2.448402000 | -2.340840000 | -2.244700000 |
| 6 | -3.082043000 | 1.774036000  | -1.739282000 |
| 1 | -2.132033000 | 1.541274000  | -2.226609000 |
| 1 | -3.265471000 | 2.848161000  | -1.857210000 |
| 1 | -3.878373000 | 1.248017000  | -2.276339000 |
| 1 | 0.371813000  | 1.283606000  | 0.431309000  |
| 1 | -0.037547000 | 0.443060000  | 2.278162000  |

-2063.343040

**28**

|    |              |              |              |
|----|--------------|--------------|--------------|
| 1  | 1.720309000  | 3.567424000  | -1.446206000 |
| 1  | 1.146857000  | 3.182363000  | 1.659382000  |
| 7  | 1.546240000  | 4.293972000  | -0.755081000 |
| 1  | 2.137480000  | 5.080874000  | -1.014385000 |
| 6  | 0.128152000  | 4.701392000  | -0.785175000 |
| 1  | -0.184147000 | 5.002933000  | -1.801703000 |
| 6  | -0.085867000 | 5.889847000  | 0.154035000  |
| 1  | 0.171127000  | 5.615847000  | 1.181515000  |
| 1  | 0.537877000  | 6.739250000  | -0.146688000 |
| 1  | -1.131844000 | 6.213976000  | 0.134086000  |
| 6  | -0.782284000 | 3.518229000  | -0.422696000 |
| 1  | -1.814576000 | 3.793458000  | -0.659741000 |
| 1  | -0.519522000 | 2.644620000  | -1.040146000 |
| 6  | 0.366337000  | 2.455318000  | 1.414563000  |
| 8  | -0.801232000 | 3.144636000  | 0.955270000  |
| 8  | 0.056417000  | 1.709384000  | 2.542874000  |
| 25 | -0.020830000 | -0.850239000 | -0.124711000 |
| 15 | 2.298661000  | -0.797412000 | 0.177460000  |
| 15 | -2.339238000 | -0.685428000 | 0.122337000  |
| 8  | -0.091061000 | -3.541560000 | -1.238223000 |
| 8  | 0.033761000  | 0.298829000  | -2.844664000 |
| 7  | -0.051167000 | -0.972311000 | 1.822600000  |
| 6  | 1.132349000  | -1.413727000 | 2.585044000  |
| 1  | 1.204813000  | -2.512861000 | 2.563265000  |
| 1  | 1.025868000  | -1.131214000 | 3.644847000  |
| 6  | -1.264979000 | -1.409344000 | 2.539258000  |
| 1  | -1.179715000 | -1.168550000 | 3.611304000  |
| 1  | -1.370227000 | -2.504325000 | 2.474830000  |
| 6  | 3.316929000  | 0.729695000  | -0.264375000 |
| 1  | 2.806403000  | 1.510323000  | 0.311526000  |

|   |              |              |              |
|---|--------------|--------------|--------------|
| 6 | -3.469836000 | -2.048442000 | -0.499613000 |
| 1 | -4.490567000 | -1.699172000 | -0.301596000 |
| 6 | -2.499731000 | -0.713916000 | 1.970803000  |
| 1 | -2.507405000 | 0.330687000  | 2.299184000  |
| 1 | -3.431152000 | -1.178555000 | 2.307146000  |
| 6 | -3.205502000 | 0.930310000  | -0.292356000 |
| 1 | -2.556368000 | 1.644846000  | 0.227082000  |
| 6 | 2.408089000  | -0.781285000 | 2.030062000  |
| 1 | 3.309084000  | -1.278127000 | 2.402377000  |
| 1 | 2.451765000  | 0.269649000  | 2.335482000  |
| 6 | 3.259729000  | -2.490439000 | -1.879758000 |
| 1 | 2.235516000  | -2.710377000 | -2.192156000 |
| 1 | 3.886393000  | -3.345843000 | -2.158330000 |
| 1 | 3.608849000  | -1.627188000 | -2.450928000 |
| 6 | 2.982628000  | -3.543316000 | 0.412371000  |
| 1 | 3.148269000  | -3.439046000 | 1.488072000  |
| 1 | 3.616981000  | -4.366036000 | 0.061760000  |
| 1 | 1.942685000  | -3.836274000 | 0.251076000  |
| 6 | 3.345116000  | -2.261931000 | -0.360488000 |
| 1 | 4.378536000  | -2.001301000 | -0.103539000 |
| 6 | -0.058662000 | -2.445998000 | -0.816532000 |
| 6 | 0.013290000  | -0.137765000 | -1.755609000 |
| 6 | 3.260344000  | 1.144405000  | -1.742116000 |
| 1 | 3.801091000  | 0.442127000  | -2.383080000 |
| 1 | 3.741357000  | 2.122813000  | -1.859956000 |
| 1 | 2.237510000  | 1.221349000  | -2.114244000 |
| 6 | 4.772889000  | 0.659385000  | 0.227958000  |
| 1 | 4.847757000  | 0.350933000  | 1.275056000  |
| 1 | 5.236615000  | 1.648759000  | 0.138123000  |
| 1 | 5.366601000  | -0.034533000 | -0.376392000 |
| 6 | -4.622611000 | 1.050662000  | 0.296630000  |
| 1 | -5.324333000 | 0.372275000  | -0.201015000 |
| 1 | -4.992109000 | 2.071481000  | 0.142395000  |
| 1 | -4.656469000 | 0.848000000  | 1.370811000  |
| 6 | -3.261031000 | -3.365495000 | 0.269856000  |
| 1 | -2.244006000 | -3.747013000 | 0.147645000  |
| 1 | -3.948798000 | -4.124936000 | -0.120387000 |
| 1 | -3.462165000 | -3.259465000 | 1.339250000  |
| 6 | -3.311155000 | -2.271821000 | -2.014251000 |
| 1 | -3.500547000 | -1.366262000 | -2.593963000 |
| 1 | -4.023787000 | -3.035383000 | -2.347918000 |
| 1 | -2.305667000 | -2.623594000 | -2.258307000 |
| 6 | -3.219713000 | 1.290475000  | -1.786677000 |
| 1 | -2.243167000 | 1.175567000  | -2.259222000 |
| 1 | -3.527578000 | 2.336218000  | -1.903860000 |
| 1 | -3.941915000 | 0.679924000  | -2.337738000 |

|   |              |             |             |
|---|--------------|-------------|-------------|
| 1 | 0.720119000  | 1.806526000 | 0.593424000 |
| 1 | -0.069857000 | 0.757020000 | 2.252390000 |

-2063.342460

**29**

|   |              |              |              |
|---|--------------|--------------|--------------|
| 1 | 1.253430000  | 2.003831000  | 0.747500000  |
| 1 | -1.146546000 | 0.864573000  | -1.098469000 |
| 7 | 1.365011000  | 1.413386000  | -0.074520000 |
| 1 | 2.188265000  | 1.757510000  | -0.563860000 |
| 6 | 1.565665000  | 0.008473000  | 0.325809000  |
| 1 | 2.388105000  | -0.095681000 | 1.056741000  |
| 6 | 1.907586000  | -0.832147000 | -0.905259000 |
| 1 | 1.094009000  | -0.787932000 | -1.635039000 |
| 1 | 2.824017000  | -0.466279000 | -1.381281000 |
| 1 | 2.065907000  | -1.878913000 | -0.625704000 |
| 6 | 0.315430000  | -0.518868000 | 1.043810000  |
| 1 | 0.541738000  | -1.500708000 | 1.470989000  |
| 1 | 0.046198000  | 0.157542000  | 1.871198000  |
| 6 | -1.545357000 | 0.432311000  | -0.177720000 |
| 8 | -0.817963000 | -0.728510000 | 0.199479000  |
| 8 | -2.871980000 | 0.058776000  | -0.453106000 |
| 1 | -1.488942000 | 1.175999000  | 0.632743000  |
| 1 | -3.261649000 | -0.304396000 | 0.356000000  |

-364.156455

**30**

|    |              |              |              |
|----|--------------|--------------|--------------|
| 25 | -0.924638000 | 0.578943000  | 0.098833000  |
| 15 | 0.760831000  | 2.096957000  | 0.082309000  |
| 15 | -2.045342000 | -1.398005000 | -0.059619000 |
| 8  | -2.825823000 | 2.175856000  | -1.492354000 |
| 8  | -2.143133000 | 1.445444000  | 2.620068000  |
| 7  | 0.197745000  | -0.236309000 | -1.594804000 |
| 6  | 0.853291000  | 0.832630000  | -2.381942000 |
| 1  | 0.064385000  | 1.454300000  | -2.815208000 |
| 1  | 1.438744000  | 0.407419000  | -3.210939000 |
| 6  | -0.606078000 | -1.171707000 | -2.414691000 |
| 1  | 0.015159000  | -1.631162000 | -3.197892000 |
| 1  | -1.391002000 | -0.589136000 | -2.905828000 |
| 6  | 2.090183000  | 1.964723000  | 1.406646000  |
| 1  | 2.368136000  | 0.907000000  | 1.306495000  |
| 6  | -3.881194000 | -1.432430000 | -0.479379000 |
| 1  | -4.228049000 | -2.456881000 | -0.296888000 |
| 6  | -1.201175000 | -2.242850000 | -1.499496000 |
| 1  | -0.397496000 | -2.857402000 | -1.077802000 |



|   |              |              |              |
|---|--------------|--------------|--------------|
| 1 | -1.868851000 | -2.909940000 | -2.051511000 |
| 6 | -1.850486000 | -2.679276000 | 1.298519000  |
| 1 | -0.760182000 | -2.722518000 | 1.390833000  |
| 6 | 1.744542000  | 1.655748000  | -1.450370000 |
| 1 | 2.152401000  | 2.531277000  | -1.960899000 |
| 1 | 2.597688000  | 1.050834000  | -1.128924000 |
| 6 | -0.644124000 | 4.378325000  | 0.941687000  |
| 1 | -1.604181000 | 3.899766000  | 0.725267000  |
| 1 | -0.785553000 | 5.464663000  | 0.891899000  |
| 1 | -0.372271000 | 4.122766000  | 1.968825000  |
| 6 | -0.021035000 | 4.340435000  | -1.501490000 |
| 1 | 0.745184000  | 4.136024000  | -2.254697000 |
| 1 | -0.223872000 | 5.417859000  | -1.528423000 |
| 1 | -0.938789000 | 3.824439000  | -1.795729000 |
| 6 | 0.420487000  | 3.942493000  | -0.081467000 |
| 1 | 1.360347000  | 4.462349000  | 0.140629000  |
| 6 | -2.044036000 | 1.522678000  | -0.896296000 |
| 6 | -1.663715000 | 1.105487000  | 1.599845000  |
| 6 | 1.542290000  | 2.157839000  | 2.828053000  |
| 1 | 1.297365000  | 3.207022000  | 3.023284000  |
| 1 | 2.301585000  | 1.860527000  | 3.561380000  |
| 1 | 0.647160000  | 1.555074000  | 2.998426000  |
| 6 | 3.339680000  | 2.828198000  | 1.171427000  |
| 1 | 3.758352000  | 2.700463000  | 0.167899000  |
| 1 | 4.118883000  | 2.554717000  | 1.893304000  |
| 1 | 3.124525000  | 3.892442000  | 1.315194000  |
| 6 | -2.353823000 | -4.085948000 | 0.935771000  |
| 1 | -3.446392000 | -4.121303000 | 0.859772000  |
| 1 | -2.059948000 | -4.792960000 | 1.721370000  |
| 1 | -1.934598000 | -4.451090000 | -0.006829000 |
| 6 | -4.163287000 | -1.090712000 | -1.953022000 |
| 1 | -3.797260000 | -0.092546000 | -2.207781000 |
| 1 | -5.246009000 | -1.099847000 | -2.128265000 |
| 1 | -3.715348000 | -1.810166000 | -2.644641000 |
| 6 | -4.658737000 | -0.474785000 | 0.442914000  |
| 1 | -4.479139000 | -0.670927000 | 1.502651000  |
| 1 | -5.735655000 | -0.574928000 | 0.260141000  |
| 1 | -4.377014000 | 0.563892000  | 0.246462000  |
| 6 | -2.428130000 | -2.224151000 | 2.647931000  |
| 1 | -2.106266000 | -1.214537000 | 2.914083000  |
| 1 | -2.094101000 | -2.907300000 | 3.438361000  |
| 1 | -3.523279000 | -2.245972000 | 2.644595000  |
| 1 | 0.936037000  | -0.789669000 | -1.158107000 |
| 1 | 0.092977000  | -0.285516000 | 1.008494000  |
| 1 | 4.972525000  | -1.723842000 | 1.959639000  |
| 1 | 2.216849000  | -1.881156000 | 1.329511000  |

|   |             |              |              |
|---|-------------|--------------|--------------|
| 7 | 2.822731000 | -2.371038000 | -0.582722000 |
| 1 | 2.782886000 | -3.094063000 | -1.295956000 |
| 6 | 3.985277000 | -1.477126000 | -0.609623000 |
| 1 | 3.720782000 | -0.589067000 | -0.022502000 |
| 6 | 4.296493000 | -1.070606000 | -2.051353000 |
| 1 | 4.600943000 | -1.942856000 | -2.641269000 |
| 1 | 3.423019000 | -0.625723000 | -2.532952000 |
| 1 | 5.111919000 | -0.342539000 | -2.075698000 |
| 6 | 5.210160000 | -2.136216000 | 0.049229000  |
| 1 | 5.457276000 | -3.059323000 | -0.485491000 |
| 1 | 6.069432000 | -1.456293000 | -0.024143000 |
| 6 | 2.097077000 | -2.632706000 | 0.535450000  |
| 8 | 4.966520000 | -2.514858000 | 1.403180000  |
| 8 | 1.323563000 | -3.586549000 | 0.641769000  |

-2063.363890

**TS12**

|    |              |              |              |
|----|--------------|--------------|--------------|
| 25 | 0.498299000  | 0.621859000  | -0.148364000 |
| 15 | -1.589647000 | 1.602688000  | 0.018054000  |
| 15 | 2.379287000  | -0.701574000 | 0.110296000  |
| 8  | 1.876200000  | 3.006973000  | 0.860056000  |
| 8  | 1.011838000  | 1.354009000  | -2.949983000 |
| 7  | -0.029312000 | -0.166637000 | 1.774208000  |
| 6  | -0.927943000 | 0.716351000  | 2.555666000  |
| 1  | -0.363413000 | 1.615500000  | 2.821430000  |
| 1  | -1.232878000 | 0.225781000  | 3.491512000  |
| 6  | 1.124098000  | -0.639899000 | 2.577041000  |
| 1  | 0.771924000  | -1.172198000 | 3.472429000  |
| 1  | 1.685666000  | 0.237987000  | 2.911126000  |
| 6  | -2.999331000 | 0.983439000  | -1.056560000 |
| 1  | -3.018116000 | -0.080875000 | -0.800430000 |
| 6  | 4.080707000  | 0.073393000  | 0.331521000  |
| 1  | 4.792178000  | -0.751830000 | 0.206003000  |
| 6  | 1.998761000  | -1.556860000 | 1.722197000  |
| 1  | 1.436972000  | -2.461756000 | 1.466806000  |
| 1  | 2.895103000  | -1.870613000 | 2.263872000  |
| 6  | 2.666241000  | -2.134779000 | -1.051378000 |
| 1  | 1.657333000  | -2.558810000 | -1.136106000 |
| 6  | -2.157334000 | 1.076900000  | 1.720369000  |
| 1  | -2.764534000 | 1.835055000  | 2.220339000  |
| 1  | -2.790270000 | 0.192875000  | 1.595537000  |
| 6  | -0.975471000 | 4.055349000  | -1.218127000 |
| 1  | 0.101283000  | 3.922564000  | -1.082542000 |
| 1  | -1.176367000 | 5.129533000  | -1.304329000 |
| 1  | -1.250418000 | 3.586198000  | -2.166050000 |

|   |              |              |              |
|---|--------------|--------------|--------------|
| 6 | -1.332241000 | 4.160904000  | 1.286997000  |
| 1 | -1.943999000 | 3.850503000  | 2.138544000  |
| 1 | -1.452600000 | 5.245328000  | 1.178840000  |
| 1 | -0.284048000 | 3.969809000  | 1.526635000  |
| 6 | -1.756471000 | 3.476266000  | -0.024534000 |
| 1 | -2.822233000 | 3.680090000  | -0.174856000 |
| 6 | 1.316733000  | 2.050825000  | 0.469535000  |
| 6 | 0.807395000  | 1.065389000  | -1.833171000 |
| 6 | -2.697264000 | 1.083437000  | -2.558755000 |
| 1 | -2.704561000 | 2.122489000  | -2.903234000 |
| 1 | -3.466587000 | 0.545908000  | -3.125249000 |
| 1 | -1.726293000 | 0.647070000  | -2.806122000 |
| 6 | -4.379705000 | 1.566040000  | -0.714022000 |
| 1 | -4.600607000 | 1.514636000  | 0.357027000  |
| 1 | -5.156074000 | 0.999960000  | -1.242027000 |
| 1 | -4.467249000 | 2.610480000  | -1.030496000 |
| 6 | 3.620597000  | -3.212930000 | -0.511182000 |
| 1 | 4.648501000  | -2.844027000 | -0.416594000 |
| 1 | 3.642976000  | -4.057898000 | -1.210274000 |
| 1 | 3.310134000  | -3.603574000 | 0.462422000  |
| 6 | 4.306438000  | 0.680415000  | 1.727454000  |
| 1 | 3.604311000  | 1.492626000  | 1.933252000  |
| 1 | 5.318017000  | 1.100491000  | 1.778960000  |
| 1 | 4.221015000  | -0.061739000 | 2.526192000  |
| 6 | 4.357185000  | 1.122759000  | -0.762397000 |
| 1 | 4.169379000  | 0.743862000  | -1.769139000 |
| 1 | 5.407063000  | 1.435379000  | -0.712545000 |
| 1 | 3.737512000  | 2.011285000  | -0.620066000 |
| 6 | 3.090212000  | -1.691478000 | -2.461419000 |
| 1 | 2.452935000  | -0.895550000 | -2.855175000 |
| 1 | 3.016473000  | -2.545921000 | -3.144486000 |
| 1 | 4.129936000  | -1.346061000 | -2.484480000 |
| 1 | -0.564478000 | -1.009731000 | 1.483948000  |
| 1 | -0.301248000 | -0.870300000 | -0.727347000 |
| 1 | -4.271976000 | -2.884849000 | -1.397435000 |
| 1 | -1.877836000 | -1.556880000 | -1.379621000 |
| 7 | -1.332766000 | -2.446863000 | 0.454210000  |
| 1 | -0.797510000 | -3.289927000 | 0.655488000  |
| 6 | -2.740204000 | -2.613461000 | 0.854772000  |
| 1 | -3.268350000 | -1.690379000 | 0.583938000  |
| 6 | -2.809436000 | -2.786810000 | 2.377073000  |
| 1 | -2.293689000 | -3.704541000 | 2.684054000  |
| 1 | -2.328920000 | -1.946443000 | 2.885758000  |
| 1 | -3.846419000 | -2.848945000 | 2.721042000  |
| 6 | -3.465531000 | -3.778978000 | 0.156948000  |
| 1 | -2.875874000 | -4.694855000 | 0.273369000  |

|   |              |              |              |
|---|--------------|--------------|--------------|
| 1 | -4.440386000 | -3.941107000 | 0.639396000  |
| 6 | -1.012856000 | -2.051570000 | -0.913872000 |
| 8 | -3.631857000 | -3.594164000 | -1.250753000 |
| 8 | -0.302032000 | -2.849753000 | -1.615482000 |

-2063.336229

**31**

|    |              |              |              |
|----|--------------|--------------|--------------|
| 25 | 0.486807000  | 0.610148000  | -0.148233000 |
| 15 | -1.614180000 | 1.579479000  | 0.019723000  |
| 15 | 2.395668000  | -0.681341000 | 0.111699000  |
| 8  | 1.836371000  | 3.014070000  | 0.844648000  |
| 8  | 0.986395000  | 1.340214000  | -2.955021000 |
| 7  | -0.019697000 | -0.160835000 | 1.773162000  |
| 6  | -0.924015000 | 0.715869000  | 2.556149000  |
| 1  | -0.370025000 | 1.623159000  | 2.816423000  |
| 1  | -1.217588000 | 0.224146000  | 3.494808000  |
| 6  | 1.139546000  | -0.619703000 | 2.576970000  |
| 1  | 0.792167000  | -1.152228000 | 3.473901000  |
| 1  | 1.692669000  | 0.264351000  | 2.909018000  |
| 6  | -3.024854000 | 0.948015000  | -1.044784000 |
| 1  | -3.017381000 | -0.121015000 | -0.809486000 |
| 6  | 4.083124000  | 0.124156000  | 0.325888000  |
| 1  | 4.806046000  | -0.690838000 | 0.198755000  |
| 6  | 2.023716000  | -1.531840000 | 1.726856000  |
| 1  | 1.471295000  | -2.443254000 | 1.474381000  |
| 1  | 2.922719000  | -1.834666000 | 2.270331000  |
| 6  | 2.697433000  | -2.111412000 | -1.047885000 |
| 1  | 1.690608000  | -2.543048000 | -1.138779000 |
| 6  | -2.163200000 | 1.056289000  | 1.727331000  |
| 1  | -2.777959000 | 1.808165000  | 2.227392000  |
| 1  | -2.783816000 | 0.162649000  | 1.609245000  |
| 6  | -1.003728000 | 4.028411000  | -1.229260000 |
| 1  | 0.073305000  | 3.910329000  | -1.084031000 |
| 1  | -1.216682000 | 5.099254000  | -1.326336000 |
| 1  | -1.265355000 | 3.547978000  | -2.175133000 |
| 6  | -1.377251000 | 4.147479000  | 1.273487000  |
| 1  | -1.992776000 | 3.838177000  | 2.122641000  |
| 1  | -1.504223000 | 5.230255000  | 1.157195000  |
| 1  | -0.329398000 | 3.965341000  | 1.521671000  |
| 6  | -1.787822000 | 3.451634000  | -0.036479000 |
| 1  | -2.854016000 | 3.647037000  | -0.195171000 |
| 6  | 1.288823000  | 2.052593000  | 0.454026000  |
| 6  | 0.786759000  | 1.050251000  | -1.839056000 |
| 6  | -2.747463000 | 1.084034000  | -2.548922000 |
| 1  | -2.791608000 | 2.128564000  | -2.873758000 |

|   |              |              |              |
|---|--------------|--------------|--------------|
| 1 | -3.508759000 | 0.533825000  | -3.113845000 |
| 1 | -1.768204000 | 0.681061000  | -2.819248000 |
| 6 | -4.411373000 | 1.496324000  | -0.671298000 |
| 1 | -4.619464000 | 1.412443000  | 0.400017000  |
| 1 | -5.182876000 | 0.929792000  | -1.205789000 |
| 1 | -4.522076000 | 2.546986000  | -0.958454000 |
| 6 | 3.657007000  | -3.181127000 | -0.500205000 |
| 1 | 4.680701000  | -2.803132000 | -0.394905000 |
| 1 | 3.693571000  | -4.024328000 | -1.200772000 |
| 1 | 3.340618000  | -3.576860000 | 0.469369000  |
| 6 | 4.304505000  | 0.735761000  | 1.720398000  |
| 1 | 3.590472000  | 1.536810000  | 1.928720000  |
| 1 | 5.309409000  | 1.171913000  | 1.767188000  |
| 1 | 4.234487000  | -0.007156000 | 2.519935000  |
| 6 | 4.340684000  | 1.175204000  | -0.771102000 |
| 1 | 4.154503000  | 0.792189000  | -1.776515000 |
| 1 | 5.386564000  | 1.501331000  | -0.725619000 |
| 1 | 3.710730000  | 2.056254000  | -0.628120000 |
| 6 | 3.127535000  | -1.665584000 | -2.455247000 |
| 1 | 2.487114000  | -0.874984000 | -2.854709000 |
| 1 | 3.063664000  | -2.521349000 | -3.137597000 |
| 1 | 4.165017000  | -1.313062000 | -2.472747000 |
| 1 | -0.553284000 | -1.013140000 | 1.491690000  |
| 1 | -0.291062000 | -0.931597000 | -0.719741000 |
| 1 | -4.257157000 | -2.888981000 | -1.402953000 |
| 1 | -1.843332000 | -1.577418000 | -1.372870000 |
| 7 | -1.305701000 | -2.420252000 | 0.487220000  |
| 1 | -0.765767000 | -3.262143000 | 0.683428000  |
| 6 | -2.718429000 | -2.630086000 | 0.845717000  |
| 1 | -3.264055000 | -1.715892000 | 0.578402000  |
| 6 | -2.818281000 | -2.827311000 | 2.364186000  |
| 1 | -2.293600000 | -3.740770000 | 2.669261000  |
| 1 | -2.361270000 | -1.986374000 | 2.893916000  |
| 1 | -3.860939000 | -2.911319000 | 2.686087000  |
| 6 | -3.405278000 | -3.800440000 | 0.116285000  |
| 1 | -2.781623000 | -4.696997000 | 0.200409000  |
| 1 | -4.369680000 | -4.013071000 | 0.600340000  |
| 6 | -0.956333000 | -2.020069000 | -0.890939000 |
| 8 | -3.593646000 | -3.581782000 | -1.284562000 |
| 8 | -0.251999000 | -2.859658000 | -1.577418000 |

-2063.337235

### TS13

|    |              |             |              |
|----|--------------|-------------|--------------|
| 25 | -0.644892000 | 0.679179000 | 0.052937000  |
| 15 | 1.354902000  | 1.839384000 | -0.032554000 |

|    |              |              |              |
|----|--------------|--------------|--------------|
| 15 | -2.295439000 | -0.941181000 | -0.138365000 |
| 8  | -2.311502000 | 2.911974000  | -0.793318000 |
| 8  | -1.191038000 | 1.322946000  | 2.882258000  |
| 7  | 0.008348000  | -0.078901000 | -1.642635000 |
| 6  | 0.866860000  | 0.757551000  | -2.497391000 |
| 1  | 0.277131000  | 1.573614000  | -2.948218000 |
| 1  | 1.266101000  | 0.171734000  | -3.341981000 |
| 6  | -0.891456000 | -0.868370000 | -2.498158000 |
| 1  | -0.307961000 | -1.439813000 | -3.240566000 |
| 1  | -1.554661000 | -0.203028000 | -3.076359000 |
| 6  | 2.734235000  | 1.272746000  | 1.115199000  |
| 1  | 2.824117000  | 0.216934000  | 0.832369000  |
| 6  | -4.071853000 | -0.441836000 | -0.477797000 |
| 1  | -4.656423000 | -1.369041000 | -0.435892000 |
| 6  | -1.725907000 | -1.838457000 | -1.662082000 |
| 1  | -1.101121000 | -2.669959000 | -1.319069000 |
| 1  | -2.552646000 | -2.270015000 | -2.233835000 |
| 6  | -2.377943000 | -2.324378000 | 1.125588000  |
| 1  | -1.325791000 | -2.632091000 | 1.203204000  |
| 6  | 2.030827000  | 1.337024000  | -1.692016000 |
| 1  | 2.526674000  | 2.159242000  | -2.214288000 |
| 1  | 2.785497000  | 0.563998000  | -1.519566000 |
| 6  | 0.616188000  | 4.244205000  | 1.227430000  |
| 1  | -0.443020000 | 3.977199000  | 1.166468000  |
| 1  | 0.688198000  | 5.337443000  | 1.261839000  |
| 1  | 1.004717000  | 3.855427000  | 2.171945000  |
| 6  | 0.836924000  | 4.329881000  | -1.292556000 |
| 1  | 1.415415000  | 4.037893000  | -2.173113000 |
| 1  | 0.882259000  | 5.422702000  | -1.218358000 |
| 1  | -0.206365000 | 4.052624000  | -1.460086000 |
| 6  | 1.387507000  | 3.713227000  | 0.006133000  |
| 1  | 2.441130000  | 4.001398000  | 0.098388000  |
| 6  | -1.645089000 | 2.017311000  | -0.424220000 |
| 6  | -0.958260000 | 1.039531000  | 1.768514000  |
| 6  | 2.378265000  | 1.312834000  | 2.607566000  |
| 1  | 2.303025000  | 2.339846000  | 2.977939000  |
| 1  | 3.167430000  | 0.814795000  | 3.182690000  |
| 1  | 1.435821000  | 0.804224000  | 2.818109000  |
| 6  | 4.089189000  | 1.949022000  | 0.847337000  |
| 1  | 4.362515000  | 1.940024000  | -0.212595000 |
| 1  | 4.876434000  | 1.422192000  | 1.399254000  |
| 1  | 4.089870000  | 2.988699000  | 1.190673000  |
| 6  | -3.202615000 | -3.539238000 | 0.665328000  |
| 1  | -4.271458000 | -3.304646000 | 0.606012000  |
| 1  | -3.087004000 | -4.350857000 | 1.393746000  |
| 1  | -2.884293000 | -3.924971000 | -0.307657000 |

|   |              |              |              |
|---|--------------|--------------|--------------|
| 6 | -4.245539000 | 0.168382000  | -1.880312000 |
| 1 | -3.638419000 | 1.068894000  | -2.004743000 |
| 1 | -5.294507000 | 0.453435000  | -2.023598000 |
| 1 | -3.985196000 | -0.534703000 | -2.676138000 |
| 6 | -4.596425000 | 0.522985000  | 0.601084000  |
| 1 | -4.509647000 | 0.113729000  | 1.609527000  |
| 1 | -5.656022000 | 0.736864000  | 0.417623000  |
| 1 | -4.054150000 | 1.471616000  | 0.576344000  |
| 6 | -2.823917000 | -1.873190000 | 2.525936000  |
| 1 | -2.296663000 | -0.979692000 | 2.865113000  |
| 1 | -2.617959000 | -2.676134000 | 3.243364000  |
| 1 | -3.899955000 | -1.673258000 | 2.562337000  |
| 1 | 1.122840000  | -1.476068000 | -0.906839000 |
| 1 | 0.674778000  | -1.168523000 | 1.222939000  |
| 1 | 4.900834000  | -2.550564000 | 1.059464000  |
| 1 | 2.333200000  | -1.802330000 | 1.651559000  |
| 7 | 1.657899000  | -2.246432000 | -0.433239000 |
| 1 | 1.167281000  | -3.122646000 | -0.619826000 |
| 6 | 3.046706000  | -2.322520000 | -0.959057000 |
| 1 | 3.535782000  | -1.378899000 | -0.692019000 |
| 6 | 3.023426000  | -2.469187000 | -2.486173000 |
| 1 | 2.590193000  | -3.433626000 | -2.775273000 |
| 1 | 2.426462000  | -1.677526000 | -2.946139000 |
| 1 | 4.037582000  | -2.412055000 | -2.893009000 |
| 6 | 3.842075000  | -3.468995000 | -0.317194000 |
| 1 | 3.236797000  | -4.381554000 | -0.312535000 |
| 1 | 4.729762000  | -3.660904000 | -0.934090000 |
| 6 | 1.321329000  | -2.080700000 | 1.312868000  |
| 8 | 4.218870000  | -3.235679000 | 1.039366000  |
| 8 | 0.783780000  | -3.153461000 | 1.752970000  |

-2063.321285

**32**

|    |              |              |              |
|----|--------------|--------------|--------------|
| 25 | 0.649350000  | 0.725644000  | -0.022649000 |
| 15 | -1.419058000 | 1.749546000  | 0.057127000  |
| 15 | 2.352468000  | -0.834800000 | 0.197294000  |
| 8  | 2.249632000  | 3.124621000  | 0.388691000  |
| 8  | 0.954606000  | 1.005393000  | -2.945971000 |
| 7  | 0.151436000  | 0.121011000  | 1.744809000  |
| 6  | -0.768798000 | 0.905976000  | 2.580694000  |
| 1  | -0.253719000 | 1.790434000  | 2.992702000  |
| 1  | -1.101294000 | 0.312275000  | 3.447947000  |
| 6  | 1.060528000  | -0.641013000 | 2.610192000  |
| 1  | 0.484274000  | -1.182255000 | 3.379559000  |
| 1  | 1.737819000  | 0.036888000  | 3.157035000  |

|   |              |              |              |
|---|--------------|--------------|--------------|
| 6 | -2.789132000 | 0.983873000  | -0.983641000 |
| 1 | -2.683652000 | -0.075995000 | -0.717618000 |
| 6 | 4.125998000  | -0.273799000 | 0.436516000  |
| 1 | 4.736346000  | -1.185313000 | 0.452974000  |
| 6 | 1.865556000  | -1.649034000 | 1.792840000  |
| 1 | 1.221164000  | -2.493092000 | 1.524517000  |
| 1 | 2.722585000  | -2.045982000 | 2.345214000  |
| 6 | 2.426740000  | -2.301744000 | -0.977368000 |
| 1 | 1.375297000  | -2.610413000 | -1.027770000 |
| 6 | -1.994643000 | 1.332910000  | 1.774777000  |
| 1 | -2.546052000 | 2.149782000  | 2.247988000  |
| 1 | -2.679149000 | 0.485624000  | 1.686920000  |
| 6 | -0.901555000 | 4.093662000  | -1.411711000 |
| 1 | 0.176118000  | 3.910432000  | -1.370197000 |
| 1 | -1.057002000 | 5.172618000  | -1.527452000 |
| 1 | -1.289567000 | 3.602280000  | -2.306739000 |
| 6 | -1.019551000 | 4.347153000  | 1.101219000  |
| 1 | -1.542341000 | 4.090298000  | 2.026387000  |
| 1 | -1.124656000 | 5.428210000  | 0.952595000  |
| 1 | 0.043981000  | 4.133345000  | 1.238179000  |
| 6 | -1.588322000 | 3.606863000  | -0.123112000 |
| 1 | -2.662382000 | 3.819829000  | -0.188451000 |
| 6 | 1.610647000  | 2.159351000  | 0.181918000  |
| 6 | 0.812020000  | 0.865213000  | -1.788078000 |
| 6 | -2.587930000 | 1.108159000  | -2.501637000 |
| 1 | -2.766630000 | 2.131998000  | -2.845559000 |
| 1 | -3.309310000 | 0.462382000  | -3.016002000 |
| 1 | -1.586789000 | 0.812681000  | -2.818547000 |
| 6 | -4.203041000 | 1.448610000  | -0.593078000 |
| 1 | -4.408357000 | 1.338449000  | 0.475596000  |
| 1 | -4.946929000 | 0.853585000  | -1.136770000 |
| 1 | -4.366892000 | 2.497276000  | -0.863495000 |
| 6 | 3.251502000  | -3.486749000 | -0.444023000 |
| 1 | 4.317467000  | -3.240273000 | -0.386175000 |
| 1 | 3.150118000  | -4.336043000 | -1.130265000 |
| 1 | 2.925395000  | -3.822577000 | 0.544392000  |
| 6 | 4.304242000  | 0.453130000  | 1.781392000  |
| 1 | 3.642747000  | 1.321749000  | 1.853822000  |
| 1 | 5.336526000  | 0.811732000  | 1.868575000  |
| 1 | 4.108668000  | -0.199366000 | 2.636462000  |
| 6 | 4.600326000  | 0.621858000  | -0.722561000 |
| 1 | 4.481350000  | 0.150197000  | -1.699806000 |
| 1 | 5.663829000  | 0.854246000  | -0.591647000 |
| 1 | 4.051550000  | 1.567006000  | -0.736570000 |
| 6 | 2.867185000  | -1.949488000 | -2.407692000 |
| 1 | 2.350289000  | -1.074367000 | -2.805025000 |



|   |              |              |              |
|---|--------------|--------------|--------------|
| 1 | 2.648298000  | -2.795900000 | -3.068713000 |
| 1 | 3.945448000  | -1.768001000 | -2.458089000 |
| 1 | -1.046123000 | -1.480457000 | 0.922649000  |
| 1 | -0.635868000 | -1.299165000 | -1.769109000 |
| 1 | -4.810022000 | -2.011689000 | -0.655604000 |
| 1 | -2.317045000 | -2.068797000 | -2.073568000 |
| 7 | -1.627311000 | -2.213419000 | 0.499744000  |
| 1 | -1.095618000 | -3.082095000 | 0.534506000  |
| 6 | -2.895056000 | -2.375191000 | 1.221337000  |
| 1 | -3.378601000 | -1.389307000 | 1.247934000  |
| 6 | -2.709504000 | -2.860479000 | 2.669181000  |
| 1 | -2.265753000 | -3.863761000 | 2.682854000  |
| 1 | -2.035671000 | -2.186365000 | 3.207925000  |
| 1 | -3.662774000 | -2.898336000 | 3.209002000  |
| 6 | -3.833379000 | -3.311696000 | 0.450318000  |
| 1 | -3.314824000 | -4.250473000 | 0.225594000  |
| 1 | -4.705442000 | -3.551155000 | 1.074630000  |
| 6 | -1.225845000 | -2.196424000 | -2.024033000 |
| 8 | -4.257146000 | -2.788796000 | -0.813928000 |
| 8 | -0.681907000 | -3.256769000 | -2.309474000 |

-2063.331801

### 33

|    |              |              |              |
|----|--------------|--------------|--------------|
| 25 | -1.033126000 | 0.259118000  | -0.151522000 |
| 15 | -1.429376000 | -1.947150000 | 0.167174000  |
| 15 | -0.042097000 | 2.291232000  | 0.093182000  |
| 8  | -3.830645000 | 1.199372000  | -0.219709000 |
| 8  | -0.877221000 | 0.158948000  | -3.076441000 |
| 7  | -0.808594000 | 0.240280000  | 2.017382000  |
| 6  | -1.644057000 | -0.789404000 | 2.669205000  |
| 1  | -2.693275000 | -0.514336000 | 2.522237000  |
| 1  | -1.450072000 | -0.822331000 | 3.752101000  |
| 6  | -0.954346000 | 1.588727000  | 2.607696000  |
| 1  | -0.798887000 | 1.555841000  | 3.696865000  |
| 1  | -1.976565000 | 1.932472000  | 2.420856000  |
| 6  | -0.117794000 | -3.181775000 | -0.381865000 |
| 1  | 0.758667000  | -2.789323000 | 0.148757000  |
| 6  | -0.866861000 | 3.863954000  | -0.532080000 |
| 1  | -0.118394000 | 4.664070000  | -0.474384000 |
| 6  | 0.072742000  | 2.511276000  | 1.948740000  |
| 1  | 1.076598000  | 2.193972000  | 2.248082000  |
| 1  | -0.058998000 | 3.549884000  | 2.262478000  |
| 6  | 1.763342000  | 2.460441000  | -0.400841000 |
| 1  | 2.189785000  | 1.596717000  | 0.122912000  |
| 6  | -1.338182000 | -2.144639000 | 2.027338000  |

|   |              |              |              |
|---|--------------|--------------|--------------|
| 1 | -2.003923000 | -2.925703000 | 2.404722000  |
| 1 | -0.313447000 | -2.443582000 | 2.278321000  |
| 6 | -3.401234000 | -2.439439000 | -1.774128000 |
| 1 | -3.515817000 | -1.361702000 | -1.930028000 |
| 1 | -4.342420000 | -2.927794000 | -2.054224000 |
| 1 | -2.625481000 | -2.793003000 | -2.458321000 |
| 6 | -4.220004000 | -2.267948000 | 0.606441000  |
| 1 | -4.066345000 | -2.539726000 | 1.654928000  |
| 1 | -5.156876000 | -2.736532000 | 0.281450000  |
| 1 | -4.353403000 | -1.184588000 | 0.548574000  |
| 6 | -3.070440000 | -2.739867000 | -0.301263000 |
| 1 | -2.957640000 | -3.823288000 | -0.173700000 |
| 6 | -2.712630000 | 0.825730000  | -0.142888000 |
| 6 | -0.955052000 | 0.204484000  | -1.901203000 |
| 6 | 0.197188000  | -3.116403000 | -1.883428000 |
| 1 | -0.618174000 | -3.528831000 | -2.486493000 |
| 1 | 1.088626000  | -3.719755000 | -2.100661000 |
| 1 | 0.379707000  | -2.091143000 | -2.212170000 |
| 6 | -0.357264000 | -4.630695000 | 0.071119000  |
| 1 | -0.588450000 | -4.703942000 | 1.138739000  |
| 1 | 0.541130000  | -5.231460000 | -0.116745000 |
| 1 | -1.178997000 | -5.092922000 | -0.486467000 |
| 6 | 2.460802000  | 3.737016000  | 0.096169000  |
| 1 | 2.095848000  | 4.625608000  | -0.430884000 |
| 1 | 3.538744000  | 3.666743000  | -0.096478000 |
| 1 | 2.327590000  | 3.901678000  | 1.169924000  |
| 6 | -2.076854000 | 4.275276000  | 0.326038000  |
| 1 | -2.845902000 | 3.497982000  | 0.326567000  |
| 1 | -2.525625000 | 5.185618000  | -0.089943000 |
| 1 | -1.805715000 | 4.490812000  | 1.363494000  |
| 6 | -1.302411000 | 3.692713000  | -1.998781000 |
| 1 | -0.476304000 | 3.409288000  | -2.655327000 |
| 1 | -1.724377000 | 4.632693000  | -2.374985000 |
| 1 | -2.070441000 | 2.917601000  | -2.080665000 |
| 6 | 2.002831000  | 2.258800000  | -1.904395000 |
| 1 | 1.497453000  | 1.368303000  | -2.282470000 |
| 1 | 3.076642000  | 2.139783000  | -2.093263000 |
| 1 | 1.664617000  | 3.126672000  | -2.480737000 |
| 1 | 0.171258000  | -0.027506000 | 2.154240000  |
| 1 | 0.478423000  | -0.260205000 | -0.157526000 |
| 1 | 2.857074000  | -2.008817000 | -1.898154000 |
| 1 | 2.367013000  | -1.878086000 | 1.471263000  |
| 7 | 3.841321000  | -0.552182000 | 0.954341000  |
| 1 | 4.213098000  | 0.384405000  | 1.079401000  |
| 6 | 4.589194000  | -1.480823000 | 0.103910000  |
| 1 | 4.110344000  | -2.461402000 | 0.215213000  |

|   |             |              |              |
|---|-------------|--------------|--------------|
| 6 | 6.046425000 | -1.575824000 | 0.573168000  |
| 1 | 6.548877000 | -0.606075000 | 0.477709000  |
| 1 | 6.090967000 | -1.884439000 | 1.621205000  |
| 1 | 6.598042000 | -2.304661000 | -0.028349000 |
| 6 | 4.509465000 | -1.074940000 | -1.376491000 |
| 1 | 4.860696000 | -0.044130000 | -1.494813000 |
| 1 | 5.177464000 | -1.728103000 | -1.955362000 |
| 6 | 2.731974000 | -0.854306000 | 1.649243000  |
| 8 | 3.187313000 | -1.099937000 | -1.902214000 |
| 8 | 2.156430000 | -0.082975000 | 2.428680000  |

-2063.366039

#### TS14

|    |              |              |              |
|----|--------------|--------------|--------------|
| 25 | -0.075334000 | -0.589415000 | -0.137335000 |
| 15 | 2.214778000  | -0.871680000 | 0.156943000  |
| 15 | -2.388459000 | -0.395388000 | 0.185032000  |
| 8  | -0.372695000 | -3.195561000 | -1.453172000 |
| 8  | 0.016552000  | 0.923504000  | -2.652823000 |
| 7  | -0.179540000 | -1.293676000 | 1.896431000  |
| 6  | 1.012699000  | -2.040662000 | 2.362242000  |
| 1  | 0.982191000  | -3.033246000 | 1.903066000  |
| 1  | 0.973468000  | -2.178868000 | 3.451749000  |
| 6  | -1.434944000 | -2.021893000 | 2.208566000  |
| 1  | -1.453306000 | -2.311637000 | 3.268761000  |
| 1  | -1.455566000 | -2.938695000 | 1.610924000  |
| 6  | 3.376705000  | 0.600869000  | 0.059954000  |
| 1  | 2.836092000  | 1.351164000  | 0.643610000  |
| 6  | -3.561448000 | -1.312631000 | -0.965703000 |
| 1  | -4.539058000 | -0.835484000 | -0.820736000 |
| 6  | -2.623196000 | -1.120685000 | 1.886677000  |
| 1  | -2.627620000 | -0.269642000 | 2.574163000  |
| 1  | -3.568133000 | -1.656447000 | 1.998097000  |
| 6  | -3.202110000 | 1.276686000  | 0.386300000  |
| 1  | -2.507628000 | 1.766340000  | 1.076084000  |
| 6  | 2.289778000  | -1.300304000 | 1.968830000  |
| 1  | 3.179402000  | -1.879113000 | 2.232342000  |
| 1  | 2.346178000  | -0.351291000 | 2.514813000  |
| 6  | 2.881622000  | -2.187418000 | -2.257507000 |
| 1  | 1.844242000  | -2.442274000 | -2.484821000 |
| 1  | 3.524987000  | -2.917110000 | -2.762972000 |
| 1  | 3.087672000  | -1.206969000 | -2.691347000 |
| 6  | 2.849064000  | -3.641250000 | -0.186136000 |
| 1  | 3.123116000  | -3.742243000 | 0.867699000  |
| 1  | 3.433331000  | -4.379910000 | -0.747175000 |
| 1  | 1.794299000  | -3.905302000 | -0.298025000 |

|   |              |              |              |
|---|--------------|--------------|--------------|
| 6 | 3.146761000  | -2.237113000 | -0.740694000 |
| 1 | 4.209007000  | -2.027811000 | -0.567594000 |
| 6 | -0.258138000 | -2.159976000 | -0.916033000 |
| 6 | -0.014666000 | 0.290195000  | -1.663600000 |
| 6 | 3.549876000  | 1.141699000  | -1.368936000 |
| 1 | 4.225755000  | 0.507333000  | -1.950788000 |
| 1 | 3.994994000  | 2.142240000  | -1.329277000 |
| 1 | 2.602452000  | 1.215943000  | -1.908540000 |
| 6 | 4.744519000  | 0.387362000  | 0.729764000  |
| 1 | 4.658105000  | 0.078362000  | 1.775168000  |
| 1 | 5.305566000  | 1.329108000  | 0.709871000  |
| 1 | 5.344825000  | -0.360229000 | 0.200605000  |
| 6 | -4.601193000 | 1.215743000  | 1.060890000  |
| 1 | -4.949741000 | 0.198712000  | 1.264137000  |
| 1 | -5.356438000 | 1.686927000  | 0.423558000  |
| 1 | -4.595694000 | 1.748489000  | 2.016748000  |
| 6 | -3.710185000 | -2.807394000 | -0.632783000 |
| 1 | -2.756188000 | -3.335946000 | -0.705726000 |
| 1 | -4.398149000 | -3.270243000 | -1.350142000 |
| 1 | -4.120751000 | -2.974071000 | 0.366612000  |
| 6 | -3.143629000 | -1.124647000 | -2.436379000 |
| 1 | -2.997102000 | -0.075552000 | -2.702871000 |
| 1 | -3.920006000 | -1.533917000 | -3.093382000 |
| 1 | -2.210999000 | -1.653169000 | -2.648987000 |
| 6 | -3.248098000 | 2.067359000  | -0.929278000 |
| 1 | -2.277899000 | 2.103358000  | -1.426534000 |
| 1 | -3.550247000 | 3.101121000  | -0.727052000 |
| 1 | -3.983149000 | 1.642377000  | -1.620991000 |
| 1 | -0.239319000 | -0.389486000 | 2.405968000  |
| 1 | 0.112169000  | 0.987580000  | 0.676907000  |
| 1 | -0.253510000 | 3.110535000  | -2.214544000 |
| 1 | 1.257564000  | 1.687889000  | 1.897999000  |
| 7 | -0.003899000 | 3.100401000  | 1.050980000  |
| 1 | -0.931263000 | 3.163375000  | 0.638541000  |
| 6 | 1.031501000  | 3.465962000  | 0.075751000  |
| 1 | 1.352989000  | 2.566676000  | -0.475910000 |
| 6 | 2.251309000  | 4.088598000  | 0.770032000  |
| 1 | 1.985361000  | 5.058256000  | 1.205247000  |
| 1 | 2.619982000  | 3.452315000  | 1.579230000  |
| 1 | 3.070485000  | 4.236201000  | 0.057776000  |
| 6 | 0.478276000  | 4.442472000  | -0.963761000 |
| 1 | 0.058650000  | 5.321867000  | -0.462966000 |
| 1 | 1.301664000  | 4.778096000  | -1.609290000 |
| 6 | 0.178089000  | 1.810789000  | 1.681082000  |
| 8 | -0.584961000 | 3.889450000  | -1.741931000 |
| 8 | -0.648359000 | 1.448375000  | 2.614950000  |

-2063.339233

**34**

|    |              |              |              |
|----|--------------|--------------|--------------|
| 25 | -0.066477000 | -0.587945000 | -0.136880000 |
| 15 | 2.227237000  | -0.845715000 | 0.150803000  |
| 15 | -2.382684000 | -0.415184000 | 0.192067000  |
| 8  | -0.330645000 | -3.203301000 | -1.441939000 |
| 8  | -0.008014000 | 0.928584000  | -2.650417000 |
| 7  | -0.156424000 | -1.296169000 | 1.896580000  |
| 6  | 1.040663000  | -2.042796000 | 2.348900000  |
| 1  | 1.014269000  | -3.029334000 | 1.877010000  |
| 1  | 1.006894000  | -2.194473000 | 3.436873000  |
| 6  | -1.411223000 | -2.021817000 | 2.218115000  |
| 1  | -1.422416000 | -2.310843000 | 3.278635000  |
| 1  | -1.440222000 | -2.938245000 | 1.620979000  |
| 6  | 3.371821000  | 0.640418000  | 0.061635000  |
| 1  | 2.821107000  | 1.383461000  | 0.644887000  |
| 6  | -3.545901000 | -1.382143000 | -0.929654000 |
| 1  | -4.533421000 | -0.926252000 | -0.788784000 |
| 6  | -2.593805000 | -1.109188000 | 1.906924000  |
| 1  | -2.559843000 | -0.248034000 | 2.580650000  |
| 1  | -3.548886000 | -1.620163000 | 2.047721000  |
| 6  | -3.206264000 | 1.260677000  | 0.344686000  |
| 1  | -2.500975000 | 1.794272000  | 0.990587000  |
| 6  | 2.310677000  | -1.288110000 | 1.959217000  |
| 1  | 3.206252000  | -1.860242000 | 2.216555000  |
| 1  | 2.358963000  | -0.342866000 | 2.512752000  |
| 6  | 2.898198000  | -2.141837000 | -2.273952000 |
| 1  | 1.864255000  | -2.415538000 | -2.494971000 |
| 1  | 3.551660000  | -2.857481000 | -2.786604000 |
| 1  | 3.082632000  | -1.156207000 | -2.705577000 |
| 6  | 2.904570000  | -3.603557000 | -0.208285000 |
| 1  | 3.185580000  | -3.703670000 | 0.843897000  |
| 1  | 3.498614000  | -4.329971000 | -0.774917000 |
| 1  | 1.853955000  | -3.885167000 | -0.315841000 |
| 6  | 3.174923000  | -2.192430000 | -0.759177000 |
| 1  | 4.234721000  | -1.965741000 | -0.593149000 |
| 6  | -0.230763000 | -2.163474000 | -0.910209000 |
| 6  | -0.023316000 | 0.292243000  | -1.662423000 |
| 6  | 3.543194000  | 1.185637000  | -1.365744000 |
| 1  | 4.224041000  | 0.557026000  | -1.948144000 |
| 1  | 3.981522000  | 2.188936000  | -1.323124000 |
| 1  | 2.595890000  | 1.255052000  | -1.906369000 |
| 6  | 4.739929000  | 0.441401000  | 0.735447000  |
| 1  | 4.653547000  | 0.131551000  | 1.780640000  |

|   |              |              |              |
|---|--------------|--------------|--------------|
| 1 | 5.290806000  | 1.389188000  | 0.717398000  |
| 1 | 5.350025000  | -0.299631000 | 0.208409000  |
| 6 | -4.571332000 | 1.236401000  | 1.054774000  |
| 1 | -5.316036000 | 0.668977000  | 0.486519000  |
| 1 | -4.946130000 | 2.263030000  | 1.147114000  |
| 1 | -4.518467000 | 0.815571000  | 2.062365000  |
| 6 | -3.658056000 | -2.871062000 | -0.557562000 |
| 1 | -2.695340000 | -3.382419000 | -0.635032000 |
| 1 | -4.348628000 | -3.364469000 | -1.251652000 |
| 1 | -4.048318000 | -3.021851000 | 0.452535000  |
| 6 | -3.146810000 | -1.224122000 | -2.409097000 |
| 1 | -3.042522000 | -0.179572000 | -2.709815000 |
| 1 | -3.913530000 | -1.681690000 | -3.045414000 |
| 1 | -2.197651000 | -1.724740000 | -2.615021000 |
| 6 | -3.318265000 | 1.975897000  | -1.009252000 |
| 1 | -2.380386000 | 1.960565000  | -1.565618000 |
| 1 | -3.589497000 | 3.025409000  | -0.852494000 |
| 1 | -4.100459000 | 1.522408000  | -1.627747000 |
| 1 | -0.211691000 | -0.394104000 | 2.409252000  |
| 1 | 0.108724000  | 0.989552000  | 0.677822000  |
| 1 | -0.376832000 | 3.083187000  | -2.175115000 |
| 1 | 1.254624000  | 1.700415000  | 1.897401000  |
| 7 | -0.024760000 | 3.104566000  | 1.064206000  |
| 1 | -0.962388000 | 3.167449000  | 0.675777000  |
| 6 | 0.984428000  | 3.477108000  | 0.065030000  |
| 1 | 1.307088000  | 2.577687000  | -0.485755000 |
| 6 | 2.209056000  | 4.124098000  | 0.727010000  |
| 1 | 1.935702000  | 5.089310000  | 1.167381000  |
| 1 | 2.609302000  | 3.496028000  | 1.527340000  |
| 1 | 3.007209000  | 4.285812000  | -0.005880000 |
| 6 | 0.389826000  | 4.435413000  | -0.969028000 |
| 1 | -0.016850000 | 5.319966000  | -0.466789000 |
| 1 | 1.187635000  | 4.765645000  | -1.648665000 |
| 6 | 0.172787000  | 1.817569000  | 1.689663000  |
| 8 | -0.697865000 | 3.864205000  | -1.698251000 |
| 8 | -0.645804000 | 1.445209000  | 2.624770000  |

-2063.343461

### TS15

|    |              |              |              |
|----|--------------|--------------|--------------|
| 25 | 0.287498000  | -0.593069000 | -0.120983000 |
| 15 | 2.457538000  | 0.187670000  | 0.174682000  |
| 15 | -1.926670000 | -1.258060000 | 0.118063000  |
| 8  | 1.176248000  | -3.298987000 | -0.733148000 |
| 8  | 0.063790000  | 0.142970000  | -2.970002000 |
| 7  | 0.323746000  | -0.794847000 | 1.917349000  |

|   |              |              |              |
|---|--------------|--------------|--------------|
| 6 | 1.654362000  | -0.979184000 | 2.531856000  |
| 1 | 2.045849000  | -1.979806000 | 2.299904000  |
| 1 | 1.576569000  | -0.911562000 | 3.628820000  |
| 6 | -0.657917000 | -1.726380000 | 2.505545000  |
| 1 | -0.660891000 | -1.630509000 | 3.603107000  |
| 1 | -0.383888000 | -2.765902000 | 2.275795000  |
| 6 | 2.866131000  | 1.975534000  | -0.225734000 |
| 1 | 1.978338000  | 2.508538000  | 0.126971000  |
| 6 | -2.517858000 | -2.898033000 | -0.588281000 |
| 1 | -3.613395000 | -2.851341000 | -0.551957000 |
| 6 | -2.051612000 | -1.395764000 | 1.965819000  |
| 1 | -2.339201000 | -0.403783000 | 2.330384000  |
| 1 | -2.809374000 | -2.111363000 | 2.295482000  |
| 6 | -3.304312000 | -0.060777000 | -0.320563000 |
| 1 | -2.909949000 | 0.888959000  | 0.055052000  |
| 6 | 2.602554000  | 0.111361000  | 2.025527000  |
| 1 | 3.629024000  | -0.035221000 | 2.371756000  |
| 1 | 2.252096000  | 1.079041000  | 2.398528000  |
| 6 | 3.668253000  | -1.162801000 | -2.001368000 |
| 1 | 2.880025000  | -1.914296000 | -2.084173000 |
| 1 | 4.586169000  | -1.591112000 | -2.420966000 |
| 1 | 3.381804000  | -0.312047000 | -2.622300000 |
| 6 | 4.261824000  | -2.027754000 | 0.298375000  |
| 1 | 4.546514000  | -1.783913000 | 1.325281000  |
| 1 | 5.112866000  | -2.539272000 | -0.166488000 |
| 1 | 3.429598000  | -2.735932000 | 0.330134000  |
| 6 | 3.910073000  | -0.778123000 | -0.528813000 |
| 1 | 4.765556000  | -0.092544000 | -0.485399000 |
| 6 | 0.815539000  | -2.202837000 | -0.520135000 |
| 6 | 0.151027000  | -0.119855000 | -1.833366000 |
| 6 | 2.980457000  | 2.230665000  | -1.736602000 |
| 1 | 3.895491000  | 1.791136000  | -2.147177000 |
| 1 | 3.028967000  | 3.310842000  | -1.917729000 |
| 1 | 2.117976000  | 1.841987000  | -2.281470000 |
| 6 | 4.099059000  | 2.516618000  | 0.517220000  |
| 1 | 4.011808000  | 2.422547000  | 1.603141000  |
| 1 | 4.222953000  | 3.581703000  | 0.286836000  |
| 1 | 5.017549000  | 2.007752000  | 0.204152000  |
| 6 | -4.640912000 | -0.339879000 | 0.386998000  |
| 1 | -5.072728000 | -1.295021000 | 0.069384000  |
| 1 | -5.360068000 | 0.446371000  | 0.128433000  |
| 1 | -4.545520000 | -0.354922000 | 1.476038000  |
| 6 | -2.068244000 | -4.109969000 | 0.247186000  |
| 1 | -0.978839000 | -4.191989000 | 0.282135000  |
| 1 | -2.453717000 | -5.026895000 | -0.213841000 |
| 1 | -2.445262000 | -4.075075000 | 1.272627000  |

|   |              |              |              |
|---|--------------|--------------|--------------|
| 6 | -2.085208000 | -3.070271000 | -2.056850000 |
| 1 | -2.354364000 | -2.218428000 | -2.684057000 |
| 1 | -2.568972000 | -3.960523000 | -2.475594000 |
| 1 | -1.004749000 | -3.210911000 | -2.133024000 |
| 6 | -3.512373000 | 0.086713000  | -1.836772000 |
| 1 | -2.573128000 | 0.225060000  | -2.378794000 |
| 1 | -4.148898000 | 0.956558000  | -2.035044000 |
| 1 | -4.019956000 | -0.790411000 | -2.250833000 |
| 1 | -0.051346000 | 0.388181000  | 2.318977000  |
| 1 | -0.328688000 | 1.391139000  | 0.540593000  |
| 1 | 0.335664000  | 4.048833000  | -1.388720000 |
| 1 | 0.356383000  | 2.874283000  | 1.229676000  |
| 7 | -1.706799000 | 2.879757000  | 1.270625000  |
| 1 | -2.497008000 | 2.251049000  | 1.381223000  |
| 6 | -1.886530000 | 3.801478000  | 0.143298000  |
| 1 | -1.256584000 | 4.682965000  | 0.343271000  |
| 6 | -3.353160000 | 4.247704000  | 0.108160000  |
| 1 | -4.008121000 | 3.410034000  | -0.164024000 |
| 1 | -3.663468000 | 4.616930000  | 1.090084000  |
| 1 | -3.504358000 | 5.044464000  | -0.626134000 |
| 6 | -1.461812000 | 3.267749000  | -1.240495000 |
| 1 | -1.850848000 | 2.258785000  | -1.394756000 |
| 1 | -1.881196000 | 3.913759000  | -2.025303000 |
| 6 | -0.457740000 | 2.151965000  | 1.403913000  |
| 8 | -0.043657000 | 3.159734000  | -1.395524000 |
| 8 | -0.374554000 | 1.498920000  | 2.602186000  |

-2063.338751

### 35

|    |              |              |              |
|----|--------------|--------------|--------------|
| 25 | -0.892770000 | 0.365972000  | -0.094497000 |
| 15 | -1.557087000 | -1.837654000 | 0.195152000  |
| 15 | 0.180476000  | 2.399730000  | 0.146491000  |
| 8  | -3.516581000 | 1.419029000  | -0.793464000 |
| 8  | -0.275866000 | 0.087823000  | -2.969343000 |
| 7  | -0.852438000 | 0.399099000  | 1.861823000  |
| 6  | -1.588056000 | -0.605544000 | 2.647532000  |
| 1  | -2.658293000 | -0.346666000 | 2.699380000  |
| 1  | -1.221324000 | -0.617562000 | 3.687196000  |
| 6  | -0.881724000 | 1.694035000  | 2.568754000  |
| 1  | -0.682953000 | 1.547646000  | 3.642832000  |
| 1  | -1.884389000 | 2.146403000  | 2.495571000  |
| 6  | -0.440498000 | -3.227498000 | -0.410095000 |
| 1  | 0.539093000  | -2.887290000 | -0.055904000 |
| 6  | -0.551466000 | 3.962500000  | -0.587711000 |
| 1  | 0.190369000  | 4.755966000  | -0.439543000 |



|   |              |              |              |
|---|--------------|--------------|--------------|
| 6 | 0.174179000  | 2.639787000  | 1.990778000  |
| 1 | 1.163516000  | 2.348170000  | 2.355969000  |
| 1 | 0.003933000  | 3.679749000  | 2.280827000  |
| 6 | 2.027822000  | 2.438934000  | -0.217258000 |
| 1 | 2.391876000  | 1.707943000  | 0.516248000  |
| 6 | -1.405234000 | -1.996730000 | 2.039819000  |
| 1 | -2.098717000 | -2.729983000 | 2.461584000  |
| 1 | -0.387108000 | -2.347081000 | 2.241876000  |
| 6 | -3.653945000 | -2.053828000 | -1.693062000 |
| 1 | -3.678053000 | -0.974573000 | -1.863609000 |
| 1 | -4.648184000 | -2.452851000 | -1.926030000 |
| 1 | -2.947474000 | -2.489398000 | -2.402502000 |
| 6 | -4.336850000 | -1.740225000 | 0.722490000  |
| 1 | -4.195247000 | -2.054434000 | 1.759947000  |
| 1 | -5.345022000 | -2.046461000 | 0.419805000  |
| 1 | -4.297004000 | -0.647803000 | 0.686050000  |
| 6 | -3.304527000 | -2.373977000 | -0.227729000 |
| 1 | -3.332922000 | -3.461526000 | -0.087478000 |
| 6 | -2.450421000 | 0.992216000  | -0.543750000 |
| 6 | -0.477802000 | 0.180284000  | -1.818533000 |
| 6 | -0.359372000 | -3.359599000 | -1.939762000 |
| 1 | -1.273276000 | -3.798354000 | -2.351399000 |
| 1 | 0.461193000  | -4.039143000 | -2.202636000 |
| 1 | -0.181740000 | -2.403791000 | -2.436153000 |
| 6 | -0.734427000 | -4.592713000 | 0.235933000  |
| 1 | -0.736827000 | -4.551341000 | 1.328706000  |
| 1 | 0.036388000  | -5.311947000 | -0.065857000 |
| 1 | -1.699508000 | -4.992823000 | -0.092769000 |
| 6 | 2.687674000  | 3.792057000  | 0.096420000  |
| 1 | 2.423761000  | 4.547261000  | -0.651567000 |
| 1 | 3.778281000  | 3.681313000  | 0.078514000  |
| 1 | 2.408702000  | 4.176415000  | 1.082935000  |
| 6 | -1.845132000 | 4.379790000  | 0.135699000  |
| 1 | -2.619408000 | 3.612953000  | 0.056775000  |
| 1 | -2.236641000 | 5.294581000  | -0.324942000 |
| 1 | -1.681264000 | 4.592441000  | 1.195615000  |
| 6 | -0.802178000 | 3.787546000  | -2.095475000 |
| 1 | 0.110186000  | 3.541603000  | -2.644893000 |
| 1 | -1.204178000 | 4.717232000  | -2.514838000 |
| 1 | -1.529016000 | 2.990516000  | -2.279829000 |
| 6 | 2.421313000  | 1.930156000  | -1.611429000 |
| 1 | 2.060385000  | 0.916059000  | -1.792348000 |
| 1 | 3.514966000  | 1.915089000  | -1.692890000 |
| 1 | 2.046131000  | 2.582087000  | -2.406498000 |
| 1 | 0.843618000  | -0.078867000 | 2.197743000  |
| 1 | 1.651256000  | -0.693000000 | 0.348760000  |

|   |             |              |              |
|---|-------------|--------------|--------------|
| 1 | 2.400506000 | -2.548802000 | -1.716408000 |
| 1 | 1.978625000 | -2.149340000 | 1.315299000  |
| 7 | 3.644497000 | -0.958636000 | 1.100605000  |
| 1 | 3.905351000 | 0.003573000  | 0.892234000  |
| 6 | 4.303202000 | -1.882076000 | 0.167654000  |
| 1 | 3.892757000 | -2.881979000 | 0.369839000  |
| 6 | 5.811132000 | -1.908118000 | 0.452832000  |
| 1 | 6.259409000 | -0.924542000 | 0.265664000  |
| 1 | 5.991724000 | -2.170263000 | 1.498823000  |
| 1 | 6.322427000 | -2.638376000 | -0.183335000 |
| 6 | 4.060664000 | -1.565137000 | -1.320523000 |
| 1 | 4.379381000 | -0.536841000 | -1.525599000 |
| 1 | 4.663778000 | -2.237287000 | -1.948088000 |
| 6 | 2.203872000 | -1.074380000 | 1.228946000  |
| 8 | 2.682678000 | -1.624684000 | -1.705441000 |
| 8 | 1.784213000 | -0.371322000 | 2.380565000  |

-2063.342870

### 36

|   |              |              |              |
|---|--------------|--------------|--------------|
| 1 | 3.513776000  | 0.331613000  | -0.072209000 |
| 1 | 1.577793000  | 1.195753000  | -0.599846000 |
| 1 | -0.957290000 | 2.169538000  | 0.944658000  |
| 1 | 1.349983000  | 0.696718000  | 1.092623000  |
| 7 | 0.542696000  | -0.643397000 | -0.257123000 |
| 1 | 0.498627000  | -0.791069000 | -1.262550000 |
| 6 | -0.800780000 | -0.477847000 | 0.305228000  |
| 1 | -0.675553000 | -0.331004000 | 1.387762000  |
| 6 | -1.608647000 | -1.761007000 | 0.074541000  |
| 1 | -1.738916000 | -1.949284000 | -0.998395000 |
| 1 | -1.089144000 | -2.618820000 | 0.509615000  |
| 1 | -2.603151000 | -1.688326000 | 0.526117000  |
| 6 | -1.575499000 | 0.731779000  | -0.248973000 |
| 1 | -1.651653000 | 0.645889000  | -1.338839000 |
| 1 | -2.595188000 | 0.740820000  | 0.162312000  |
| 6 | 1.549585000  | 0.330052000  | 0.077699000  |
| 8 | -0.926338000 | 1.985377000  | -0.004116000 |
| 8 | 2.824324000  | -0.339865000 | 0.028821000  |

-364.156365

### 37

|   |             |              |              |
|---|-------------|--------------|--------------|
| 1 | 2.282309000 | -2.784271000 | 2.652200000  |
| 1 | 1.682067000 | -1.164288000 | 1.273632000  |
| 7 | 2.385210000 | -2.215156000 | -0.444158000 |
| 1 | 2.154449000 | -3.203537000 | -0.502598000 |

|    |              |              |              |
|----|--------------|--------------|--------------|
| 6  | 3.683582000  | -1.920419000 | -1.105434000 |
| 1  | 3.567716000  | -1.001369000 | -1.694011000 |
| 6  | 4.145279000  | -3.044145000 | -2.024901000 |
| 1  | 4.288922000  | -3.973660000 | -1.461998000 |
| 1  | 3.409621000  | -3.224863000 | -2.815339000 |
| 1  | 5.094499000  | -2.780398000 | -2.501976000 |
| 6  | 4.603801000  | -1.635673000 | 0.086805000  |
| 1  | 5.076831000  | -2.555653000 | 0.456974000  |
| 1  | 5.368009000  | -0.881135000 | -0.108154000 |
| 6  | 2.492216000  | -1.830499000 | 0.958097000  |
| 8  | 3.699917000  | -1.104738000 | 1.074918000  |
| 8  | 2.484557000  | -3.017908000 | 1.734566000  |
| 25 | -0.943160000 | 0.612189000  | 0.036614000  |
| 15 | 0.752865000  | 2.128985000  | 0.005912000  |
| 15 | -1.917890000 | -1.444317000 | -0.067535000 |
| 8  | -2.829301000 | 2.073906000  | -1.698919000 |
| 8  | -2.306425000 | 1.572840000  | 2.445898000  |
| 7  | 0.303622000  | -0.310934000 | -1.633486000 |
| 6  | 1.042197000  | 0.723326000  | -2.382449000 |
| 1  | 0.312619000  | 1.348928000  | -2.906990000 |
| 1  | 1.699554000  | 0.266257000  | -3.138813000 |
| 6  | -0.521701000 | -1.204922000 | -2.468381000 |
| 1  | 0.083770000  | -1.675650000 | -3.258780000 |
| 1  | -1.297118000 | -0.600423000 | -2.949795000 |
| 6  | 1.973045000  | 2.121753000  | 1.438853000  |
| 1  | 2.362451000  | 1.098646000  | 1.375636000  |
| 6  | -3.764892000 | -1.668947000 | -0.343868000 |
| 1  | -3.971715000 | -2.742962000 | -0.260188000 |
| 6  | -1.140081000 | -2.274331000 | -1.563300000 |
| 1  | -0.348723000 | -2.936595000 | -1.196942000 |
| 1  | -1.856111000 | -2.894604000 | -2.109320000 |
| 6  | -1.464891000 | -2.672243000 | 1.286239000  |
| 1  | -0.375632000 | -2.718401000 | 1.159715000  |
| 6  | 1.862250000  | 1.557087000  | -1.393718000 |
| 1  | 2.365459000  | 2.388711000  | -1.894895000 |
| 1  | 2.642028000  | 0.931481000  | -0.945495000 |
| 6  | -0.621329000 | 4.512206000  | 0.579899000  |
| 1  | -1.575481000 | 3.993893000  | 0.438811000  |
| 1  | -0.778731000 | 5.578439000  | 0.376847000  |
| 1  | -0.339699000 | 4.411368000  | 1.631425000  |
| 6  | 0.030584000  | 4.178101000  | -1.835203000 |
| 1  | 0.795749000  | 3.855074000  | -2.547228000 |
| 1  | -0.134990000 | 5.249819000  | -1.999688000 |
| 1  | -0.901340000 | 3.659165000  | -2.073004000 |
| 6  | 0.446660000  | 3.946404000  | -0.372050000 |
| 1  | 1.392956000  | 4.473420000  | -0.201170000 |

|   |              |              |              |
|---|--------------|--------------|--------------|
| 6 | -2.048892000 | 1.466205000  | -1.053918000 |
| 6 | -1.767248000 | 1.195353000  | 1.468519000  |
| 6 | 1.297907000  | 2.269670000  | 2.810054000  |
| 1 | 0.902539000  | 3.279260000  | 2.963737000  |
| 1 | 2.030800000  | 2.082298000  | 3.604626000  |
| 1 | 0.477744000  | 1.557085000  | 2.923881000  |
| 6 | 3.155198000  | 3.091777000  | 1.286908000  |
| 1 | 3.635831000  | 3.014960000  | 0.305847000  |
| 1 | 3.914828000  | 2.870689000  | 2.046641000  |
| 1 | 2.843656000  | 4.131880000  | 1.432299000  |
| 6 | -2.037100000 | -4.086323000 | 1.102578000  |
| 1 | -3.113736000 | -4.110791000 | 1.303454000  |
| 1 | -1.558651000 | -4.774775000 | 1.809789000  |
| 1 | -1.871073000 | -4.478432000 | 0.093536000  |
| 6 | -4.202680000 | -1.205521000 | -1.744690000 |
| 1 | -4.031424000 | -0.135114000 | -1.882349000 |
| 1 | -5.276650000 | -1.390541000 | -1.868527000 |
| 1 | -3.686187000 | -1.739380000 | -2.547930000 |
| 6 | -4.564529000 | -0.917124000 | 0.733621000  |
| 1 | -4.336945000 | -1.265456000 | 1.744220000  |
| 1 | -5.639744000 | -1.055142000 | 0.567368000  |
| 1 | -4.348545000 | 0.155475000  | 0.693102000  |
| 6 | -1.729640000 | -2.141431000 | 2.703067000  |
| 1 | -1.318923000 | -1.137245000 | 2.829780000  |
| 1 | -1.258280000 | -2.804028000 | 3.439489000  |
| 1 | -2.799614000 | -2.110084000 | 2.932533000  |
| 1 | 0.065237000  | -0.146383000 | 1.069144000  |
| 1 | 0.993813000  | -0.908373000 | -1.159050000 |

-2063.347423

### TS16

|   |              |             |              |
|---|--------------|-------------|--------------|
| 1 | 0.598582000  | 2.623849000 | 2.476952000  |
| 1 | -1.223537000 | 1.390652000 | 2.285372000  |
| 7 | -0.539320000 | 2.932799000 | -1.295318000 |
| 1 | 0.209375000  | 3.553359000 | -0.970742000 |
| 6 | -1.783426000 | 3.612910000 | -1.147049000 |
| 1 | -2.590930000 | 2.942747000 | -1.488819000 |
| 6 | -1.927041000 | 4.942593000 | -1.934562000 |
| 1 | -1.155059000 | 5.654686000 | -1.614709000 |
| 1 | -1.775303000 | 4.740690000 | -2.999133000 |
| 1 | -2.911100000 | 5.416717000 | -1.806049000 |
| 6 | -2.134318000 | 3.974759000 | 0.326100000  |
| 1 | -1.409096000 | 4.674286000 | 0.747324000  |
| 1 | -3.150778000 | 4.352953000 | 0.451778000  |
| 6 | -1.100040000 | 2.310257000 | 1.732421000  |

|    |              |              |              |
|----|--------------|--------------|--------------|
| 8  | -2.142095000 | 2.751067000  | 1.142119000  |
| 8  | -0.077941000 | 3.093947000  | 1.959697000  |
| 25 | 0.341655000  | -0.840012000 | 0.113959000  |
| 15 | -1.905316000 | -1.286926000 | -0.086074000 |
| 15 | 2.381858000  | 0.190087000  | -0.135169000 |
| 8  | 1.227922000  | -3.405634000 | -1.026696000 |
| 8  | 0.721357000  | -1.812573000 | 2.853434000  |
| 7  | -0.025760000 | 0.243228000  | -1.803643000 |
| 6  | -1.168559000 | -0.289961000 | -2.563601000 |
| 1  | -0.900869000 | -1.277115000 | -2.957656000 |
| 1  | -1.395744000 | 0.359383000  | -3.424411000 |
| 6  | 1.192847000  | 0.336477000  | -2.627853000 |
| 1  | 0.997504000  | 0.915304000  | -3.544508000 |
| 1  | 1.498146000  | -0.673599000 | -2.926885000 |
| 6  | -3.127773000 | -0.549255000 | 1.138864000  |
| 1  | -2.938568000 | 0.519561000  | 1.003638000  |
| 6  | 3.972362000  | -0.816561000 | -0.171684000 |
| 1  | 4.798680000  | -0.102097000 | -0.078636000 |
| 6  | 2.286625000  | 1.020628000  | -1.806660000 |
| 1  | 1.994908000  | 2.060598000  | -1.632878000 |
| 1  | 3.246074000  | 1.025762000  | -2.330256000 |
| 6  | 2.777814000  | 1.667112000  | 0.957125000  |
| 1  | 1.939063000  | 2.326395000  | 0.702869000  |
| 6  | -2.390768000 | -0.387583000 | -1.648764000 |
| 1  | -3.238172000 | -0.855486000 | -2.158597000 |
| 1  | -2.698433000 | 0.620311000  | -1.349766000 |
| 6  | -1.951834000 | -3.969705000 | 0.764449000  |
| 1  | -0.861415000 | -4.027664000 | 0.700308000  |
| 1  | -2.354677000 | -4.983117000 | 0.648227000  |
| 1  | -2.207692000 | -3.623167000 | 1.769275000  |
| 6  | -2.184115000 | -3.608908000 | -1.730185000 |
| 1  | -2.648524000 | -3.027067000 | -2.531576000 |
| 1  | -2.564169000 | -4.634826000 | -1.809129000 |
| 1  | -1.106921000 | -3.642326000 | -1.908656000 |
| 6  | -2.515111000 | -3.051609000 | -0.334745000 |
| 1  | -3.606679000 | -3.019640000 | -0.241807000 |
| 6  | 0.867721000  | -2.360544000 | -0.616281000 |
| 6  | 0.571432000  | -1.439022000 | 1.745794000  |
| 6  | -2.821300000 | -0.908383000 | 2.601203000  |
| 1  | -3.082288000 | -1.948541000 | 2.821250000  |
| 1  | -3.414890000 | -0.276099000 | 3.272787000  |
| 1  | -1.763998000 | -0.776283000 | 2.846077000  |
| 6  | -4.610479000 | -0.791242000 | 0.811357000  |
| 1  | -4.850658000 | -0.554914000 | -0.230191000 |
| 1  | -5.236098000 | -0.155285000 | 1.449466000  |
| 1  | -4.902722000 | -1.829386000 | 1.001987000  |

|   |              |              |              |
|---|--------------|--------------|--------------|
| 6 | 4.079532000  | 2.409752000  | 0.616275000  |
| 1 | 4.962326000  | 1.831034000  | 0.908137000  |
| 1 | 4.117455000  | 3.359946000  | 1.162729000  |
| 1 | 4.159185000  | 2.637117000  | -0.451384000 |
| 6 | 4.159069000  | -1.584139000 | -1.492697000 |
| 1 | 3.342167000  | -2.287431000 | -1.669423000 |
| 1 | 5.090205000  | -2.161899000 | -1.446997000 |
| 1 | 4.230957000  | -0.918016000 | -2.357024000 |
| 6 | 4.015315000  | -1.784481000 | 1.023673000  |
| 1 | 3.927096000  | -1.269052000 | 1.983945000  |
| 1 | 4.963868000  | -2.334838000 | 1.025735000  |
| 1 | 3.199173000  | -2.510634000 | 0.961719000  |
| 6 | 2.704076000  | 1.341701000  | 2.457014000  |
| 1 | 1.797655000  | 0.781861000  | 2.710966000  |
| 1 | 2.744898000  | 2.264966000  | 3.051909000  |
| 1 | 3.555671000  | 0.734037000  | 2.778901000  |
| 1 | -0.156157000 | 0.612394000  | 0.819178000  |
| 1 | -0.268565000 | 1.247349000  | -1.518493000 |

-2063.237832

### 38

|    |              |              |              |
|----|--------------|--------------|--------------|
| 1  | 0.757874000  | 1.745280000  | -3.161488000 |
| 1  | 0.048717000  | 3.785586000  | -1.411214000 |
| 7  | 0.346157000  | 2.571368000  | 1.423080000  |
| 1  | -0.179017000 | 3.093923000  | 2.118727000  |
| 6  | 1.757632000  | 2.990741000  | 1.400228000  |
| 1  | 2.375368000  | 2.089512000  | 1.310380000  |
| 6  | 2.177500000  | 3.743922000  | 2.670847000  |
| 1  | 1.589663000  | 4.664371000  | 2.785569000  |
| 1  | 2.005914000  | 3.119831000  | 3.554104000  |
| 1  | 3.237192000  | 4.021938000  | 2.646487000  |
| 6  | 2.051431000  | 3.837482000  | 0.152683000  |
| 1  | 1.368193000  | 4.702039000  | 0.122652000  |
| 1  | 3.079785000  | 4.213174000  | 0.193482000  |
| 6  | 0.660520000  | 2.891394000  | -1.591748000 |
| 8  | 1.969711000  | 3.102146000  | -1.070450000 |
| 8  | 0.759819000  | 2.696588000  | -2.978412000 |
| 25 | -0.360124000 | -0.804539000 | -0.029662000 |
| 15 | 1.900085000  | -1.295867000 | 0.147952000  |
| 15 | -2.453170000 | 0.160908000  | 0.243219000  |
| 8  | -1.280219000 | -3.520915000 | -0.556948000 |
| 8  | -0.121576000 | -0.190801000 | -2.902267000 |
| 7  | -0.249300000 | -0.578286000 | 1.875194000  |
| 6  | 0.849064000  | -1.136242000 | 2.675340000  |
| 1  | 0.667094000  | -2.201769000 | 2.896673000  |

|   |              |              |              |
|---|--------------|--------------|--------------|
| 1 | 0.904613000  | -0.626678000 | 3.651182000  |
| 6 | -1.442166000 | -0.428622000 | 2.722812000  |
| 1 | -1.160551000 | -0.017107000 | 3.705651000  |
| 1 | -1.899252000 | -1.412728000 | 2.921644000  |
| 6 | 3.135374000  | -0.145779000 | -0.679621000 |
| 1 | 2.672069000  | 0.836271000  | -0.526545000 |
| 6 | -4.012820000 | -0.826848000 | -0.080555000 |
| 1 | -4.851569000 | -0.135048000 | 0.066259000  |
| 6 | -2.458186000 | 0.505500000  | 2.067437000  |
| 1 | -2.134027000 | 1.542713000  | 2.191529000  |
| 1 | -3.454255000 | 0.416027000  | 2.509901000  |
| 6 | -2.764069000 | 1.878789000  | -0.456298000 |
| 1 | -1.869947000 | 2.407398000  | -0.100523000 |
| 6 | 2.181654000  | -0.961043000 | 1.951109000  |
| 1 | 2.980246000  | -1.576144000 | 2.376720000  |
| 1 | 2.492082000  | 0.084666000  | 2.030300000  |
| 6 | 2.160718000  | -3.554846000 | -1.547998000 |
| 1 | 1.077685000  | -3.656642000 | -1.651098000 |
| 1 | 2.605220000  | -4.545799000 | -1.699543000 |
| 1 | 2.514895000  | -2.907240000 | -2.351464000 |
| 6 | 2.013375000  | -4.006345000 | 0.930633000  |
| 1 | 2.366616000  | -3.749586000 | 1.932801000  |
| 1 | 2.363475000  | -5.021080000 | 0.707634000  |
| 1 | 0.919221000  | -4.028711000 | 0.946788000  |
| 6 | 2.534028000  | -3.036632000 | -0.146342000 |
| 1 | 3.627624000  | -2.981873000 | -0.067099000 |
| 6 | -0.908342000 | -2.418884000 | -0.388759000 |
| 6 | -0.231041000 | -0.424487000 | -1.750375000 |
| 6 | 3.277310000  | -0.348778000 | -2.198005000 |
| 1 | 3.882242000  | -1.233013000 | -2.424198000 |
| 1 | 3.792944000  | 0.518261000  | -2.626839000 |
| 1 | 2.316952000  | -0.449684000 | -2.706648000 |
| 6 | 4.526356000  | -0.140215000 | -0.020864000 |
| 1 | 4.495424000  | 0.114477000  | 1.041896000  |
| 1 | 5.158077000  | 0.605355000  | -0.518418000 |
| 1 | 5.024415000  | -1.111102000 | -0.123251000 |
| 6 | -4.005994000 | 2.572569000  | 0.131086000  |
| 1 | -4.930987000 | 2.091991000  | -0.205784000 |
| 1 | -4.036810000 | 3.613492000  | -0.212379000 |
| 1 | -4.009627000 | 2.586977000  | 1.224612000  |
| 6 | -4.161396000 | -1.984814000 | 0.923224000  |
| 1 | -3.310021000 | -2.669115000 | 0.873041000  |
| 1 | -5.064163000 | -2.559552000 | 0.685279000  |
| 1 | -4.257870000 | -1.634385000 | 1.954427000  |
| 6 | -4.051004000 | -1.356093000 | -1.525016000 |
| 1 | -3.974808000 | -0.558679000 | -2.267147000 |

|   |              |              |              |
|---|--------------|--------------|--------------|
| 1 | -4.995844000 | -1.884411000 | -1.698391000 |
| 1 | -3.235031000 | -2.061160000 | -1.704182000 |
| 6 | -2.788694000 | 1.958896000  | -1.991453000 |
| 1 | -1.954490000 | 1.434811000  | -2.459301000 |
| 1 | -2.734731000 | 3.010081000  | -2.298255000 |
| 1 | -3.720291000 | 1.551573000  | -2.396784000 |
| 1 | 0.197173000  | 2.029278000  | -1.103181000 |
| 1 | 0.244504000  | 1.574626000  | 1.626505000  |

-2063.337398

**39**

|    |              |              |              |
|----|--------------|--------------|--------------|
| 1  | -1.144196000 | -4.047445000 | 0.543872000  |
| 1  | -1.464528000 | -1.864140000 | 0.983653000  |
| 7  | -3.596439000 | -2.092619000 | 0.881151000  |
| 1  | -3.614603000 | -1.484479000 | 1.691573000  |
| 6  | -4.316463000 | -1.540266000 | -0.283364000 |
| 1  | -4.234214000 | -0.443240000 | -0.308382000 |
| 6  | -5.790616000 | -1.930656000 | -0.306146000 |
| 1  | -5.897461000 | -3.020411000 | -0.294383000 |
| 1  | -6.310049000 | -1.523471000 | 0.567104000  |
| 1  | -6.279061000 | -1.535383000 | -1.204056000 |
| 6  | -3.490455000 | -2.125880000 | -1.431503000 |
| 1  | -3.814362000 | -3.146389000 | -1.675851000 |
| 1  | -3.494985000 | -1.513916000 | -2.335330000 |
| 6  | -2.253325000 | -2.440457000 | 0.485401000  |
| 8  | -2.151486000 | -2.142360000 | -0.905350000 |
| 8  | -2.072007000 | -3.829328000 | 0.718476000  |
| 25 | 0.929663000  | 0.651915000  | 0.103474000  |
| 15 | 2.195312000  | -1.227174000 | -0.097633000 |
| 15 | -0.948279000 | 1.939556000  | 0.017811000  |
| 8  | 2.760210000  | 2.532613000  | -1.246192000 |
| 8  | 1.868382000  | 1.480589000  | 2.753288000  |
| 7  | -0.001668000 | -0.187355000 | -1.795219000 |
| 6  | 0.988350000  | -0.936810000 | -2.591673000 |
| 1  | 1.743989000  | -0.227527000 | -2.943887000 |
| 1  | 0.517651000  | -1.397047000 | -3.473967000 |
| 6  | -0.726942000 | 0.859151000  | -2.540402000 |
| 1  | -1.213639000 | 0.441028000  | -3.434922000 |
| 1  | 0.002266000  | 1.605793000  | -2.869448000 |
| 6  | 1.870932000  | -2.631072000 | 1.113342000  |
| 1  | 0.802503000  | -2.803259000 | 0.930598000  |
| 6  | -0.865712000 | 3.817232000  | -0.022053000 |
| 1  | -1.892203000 | 4.187000000  | 0.092016000  |
| 6  | -1.768332000 | 1.482897000  | -1.607895000 |
| 1  | -2.540938000 | 0.739472000  | -1.386052000 |



|   |              |              |              |
|---|--------------|--------------|--------------|
| 1 | -2.266429000 | 2.334806000  | -2.077933000 |
| 6 | -2.325952000 | 1.523333000  | 1.226543000  |
| 1 | -2.467850000 | 0.462249000  | 0.988945000  |
| 6 | 1.619487000  | -2.011491000 | -1.702317000 |
| 1 | 2.425999000  | -2.534930000 | -2.223114000 |
| 1 | 0.860565000  | -2.760121000 | -1.448027000 |
| 6 | 4.667441000  | -0.329689000 | 0.887091000  |
| 1 | 4.291520000  | 0.698381000  | 0.866582000  |
| 1 | 5.759696000  | -0.296518000 | 0.795783000  |
| 1 | 4.427122000  | -0.751764000 | 1.866199000  |
| 6 | 4.498651000  | -0.549322000 | -1.620894000 |
| 1 | 4.147292000  | -1.137833000 | -2.473495000 |
| 1 | 5.593747000  | -0.522347000 | -1.672127000 |
| 1 | 4.136057000  | 0.474816000  | -1.738602000 |
| 6 | 4.066346000  | -1.146148000 | -0.270043000 |
| 1 | 4.440837000  | -2.175521000 | -0.216269000 |
| 6 | 2.013272000  | 1.766631000  | -0.748171000 |
| 6 | 1.500432000  | 1.156850000  | 1.682330000  |
| 6 | 2.008800000  | -2.210669000 | 2.583514000  |
| 1 | 3.053738000  | -2.034969000 | 2.858549000  |
| 1 | 1.630630000  | -3.009485000 | 3.232929000  |
| 1 | 1.439333000  | -1.301410000 | 2.788199000  |
| 6 | 2.636181000  | -3.931344000 | 0.825519000  |
| 1 | 2.557903000  | -4.240968000 | -0.221773000 |
| 1 | 2.234600000  | -4.742904000 | 1.444200000  |
| 1 | 3.698877000  | -3.831387000 | 1.071367000  |
| 6 | -3.651910000 | 2.263733000  | 0.997113000  |
| 1 | -3.577182000 | 3.317569000  | 1.286214000  |
| 1 | -4.439400000 | 1.812028000  | 1.612796000  |
| 1 | -3.982677000 | 2.222583000  | -0.045864000 |
| 6 | -0.309094000 | 4.343742000  | -1.356738000 |
| 1 | 0.706899000  | 3.982000000  | -1.534265000 |
| 1 | -0.272301000 | 5.439396000  | -1.328345000 |
| 1 | -0.927991000 | 4.061172000  | -2.213235000 |
| 6 | -0.009661000 | 4.334722000  | 1.146872000  |
| 1 | -0.387728000 | 4.012175000  | 2.120316000  |
| 1 | 0.008950000  | 5.431177000  | 1.141055000  |
| 1 | 1.020294000  | 3.975410000  | 1.054174000  |
| 6 | -1.887263000 | 1.599496000  | 2.695560000  |
| 1 | -0.944458000 | 1.070512000  | 2.852186000  |
| 1 | -2.651960000 | 1.140852000  | 3.334327000  |
| 1 | -1.765414000 | 2.635479000  | 3.027836000  |
| 1 | -0.067924000 | -0.380858000 | 0.892541000  |
| 1 | -0.695044000 | -0.855962000 | -1.449025000 |

-2063.342636

**TS17**

|    |              |              |              |
|----|--------------|--------------|--------------|
| 1  | -2.193433000 | -3.800531000 | -1.275326000 |
| 1  | -0.386110000 | -2.623398000 | 0.208090000  |
| 7  | -2.268117000 | -2.344225000 | 0.909709000  |
| 1  | -1.842099000 | -1.486730000 | 1.277250000  |
| 6  | -3.682689000 | -2.274244000 | 0.536843000  |
| 1  | -4.136057000 | -1.507502000 | 1.171184000  |
| 6  | -4.431997000 | -3.591491000 | 0.751337000  |
| 1  | -4.068726000 | -4.382755000 | 0.092159000  |
| 1  | -4.333848000 | -3.931208000 | 1.786951000  |
| 1  | -5.493859000 | -3.429585000 | 0.541860000  |
| 6  | -3.664983000 | -1.788307000 | -0.986265000 |
| 1  | -4.561405000 | -2.232758000 | -1.450299000 |
| 1  | -3.810708000 | -0.694248000 | -0.991196000 |
| 6  | -1.414030000 | -2.954338000 | 0.107857000  |
| 8  | -2.503469000 | -2.167828000 | -1.631552000 |
| 8  | -1.620918000 | -4.122285000 | -0.511509000 |
| 25 | 0.664213000  | 0.664415000  | 0.171752000  |
| 15 | 2.219527000  | -1.009416000 | -0.014002000 |
| 15 | -1.242967000 | 1.908418000  | -0.057188000 |
| 8  | 2.407556000  | 2.707235000  | -1.042856000 |
| 8  | 1.353163000  | 1.491496000  | 2.897724000  |
| 7  | -0.071676000 | -0.196785000 | -1.787043000 |
| 6  | 1.023403000  | -0.868738000 | -2.520938000 |
| 1  | 1.722957000  | -0.094971000 | -2.850567000 |
| 1  | 0.636943000  | -1.376817000 | -3.416670000 |
| 6  | -0.735194000 | 0.860605000  | -2.583571000 |
| 1  | -1.120590000 | 0.452915000  | -3.529784000 |
| 1  | 0.016259000  | 1.619847000  | -2.820558000 |
| 6  | 2.242273000  | -2.424412000 | 1.228873000  |
| 1  | 1.177606000  | -2.652411000 | 1.346910000  |
| 6  | -1.184180000 | 3.790124000  | -0.026972000 |
| 1  | -2.219538000 | 4.133780000  | 0.081999000  |
| 6  | -1.877062000 | 1.463338000  | -1.763173000 |
| 1  | -2.659351000 | 0.710998000  | -1.638032000 |
| 1  | -2.328022000 | 2.314329000  | -2.279487000 |
| 6  | -2.720530000 | 1.464266000  | 1.015639000  |
| 1  | -2.845157000 | 0.408898000  | 0.751505000  |
| 6  | 1.729411000  | -1.871142000 | -1.603972000 |
| 1  | 2.583442000  | -2.331661000 | -2.108139000 |
| 1  | 1.040676000  | -2.685081000 | -1.354126000 |
| 6  | 4.492200000  | 0.454306000  | 0.809758000  |
| 1  | 4.023090000  | 1.418833000  | 0.601229000  |
| 1  | 5.579383000  | 0.587763000  | 0.755733000  |
| 1  | 4.239439000  | 0.178894000  | 1.835587000  |

|   |              |              |              |
|---|--------------|--------------|--------------|
| 6 | 4.410647000  | -0.129969000 | -1.641559000 |
| 1 | 4.203522000  | -0.886085000 | -2.403752000 |
| 1 | 5.483437000  | 0.092679000  | -1.686217000 |
| 1 | 3.875196000  | 0.785517000  | -1.906893000 |
| 6 | 4.050090000  | -0.601407000 | -0.221789000 |
| 1 | 4.596450000  | -1.531920000 | -0.025592000 |
| 6 | 1.696086000  | 1.879001000  | -0.599615000 |
| 6 | 1.088145000  | 1.177343000  | 1.795857000  |
| 6 | 2.759571000  | -1.984862000 | 2.608710000  |
| 1 | 3.843997000  | -1.834810000 | 2.595267000  |
| 1 | 2.549070000  | -2.768818000 | 3.345396000  |
| 1 | 2.286622000  | -1.060716000 | 2.951796000  |
| 6 | 2.962696000  | -3.697405000 | 0.754837000  |
| 1 | 2.564549000  | -4.080729000 | -0.189181000 |
| 1 | 2.844075000  | -4.486442000 | 1.507183000  |
| 1 | 4.037631000  | -3.530250000 | 0.627015000  |
| 6 | -4.028987000 | 2.192883000  | 0.673532000  |
| 1 | -3.997066000 | 3.242132000  | 0.985417000  |
| 1 | -4.863660000 | 1.720806000  | 1.205695000  |
| 1 | -4.258231000 | 2.163082000  | -0.396620000 |
| 6 | -0.619302000 | 4.397416000  | -1.323726000 |
| 1 | 0.407048000  | 4.071566000  | -1.508051000 |
| 1 | -0.608697000 | 5.490405000  | -1.234537000 |
| 1 | -1.221827000 | 4.149730000  | -2.201946000 |
| 6 | -0.368962000 | 4.275079000  | 1.185095000  |
| 1 | -0.752962000 | 3.889635000  | 2.132979000  |
| 1 | -0.390881000 | 5.370242000  | 1.234982000  |
| 1 | 0.674609000  | 3.958318000  | 1.097723000  |
| 6 | -2.414667000 | 1.530522000  | 2.518626000  |
| 1 | -1.485415000 | 1.007961000  | 2.759584000  |
| 1 | -3.230490000 | 1.063496000  | 3.083444000  |
| 1 | -2.330463000 | 2.565314000  | 2.865702000  |
| 1 | -0.289449000 | -0.457783000 | 0.938454000  |
| 1 | -0.795445000 | -0.898605000 | -1.585492000 |

-2063.299763

**40**

|   |              |              |              |
|---|--------------|--------------|--------------|
| 1 | -1.721637000 | -1.944318000 | 0.598613000  |
| 1 | -3.641692000 | -2.747199000 | 2.558477000  |
| 7 | -4.080838000 | -2.636653000 | 0.528474000  |
| 1 | -5.024930000 | -2.855655000 | 0.837274000  |
| 6 | -4.147842000 | -1.711315000 | -0.621749000 |
| 1 | -4.247029000 | -0.669682000 | -0.260794000 |
| 6 | -5.375693000 | -2.050986000 | -1.472189000 |
| 1 | -5.316456000 | -3.082335000 | -1.840762000 |

|    |              |              |              |
|----|--------------|--------------|--------------|
| 1  | -6.301484000 | -1.948706000 | -0.893442000 |
| 1  | -5.447119000 | -1.382656000 | -2.336516000 |
| 6  | -2.860626000 | -1.773354000 | -1.476291000 |
| 1  | -2.794988000 | -2.806719000 | -1.878772000 |
| 1  | -3.032238000 | -1.111717000 | -2.350832000 |
| 6  | -3.319801000 | -2.162882000 | 1.688209000  |
| 8  | -1.699409000 | -1.403064000 | -0.798268000 |
| 8  | -1.930778000 | -2.328426000 | 1.534848000  |
| 25 | 0.919737000  | 0.567737000  | 0.063794000  |
| 15 | 2.078170000  | -1.430607000 | -0.175123000 |
| 15 | -0.841506000 | 2.072292000  | -0.028420000 |
| 8  | 3.025890000  | 2.359649000  | -0.864000000 |
| 8  | 1.747223000  | 1.119427000  | 2.840448000  |
| 7  | 0.207131000  | 0.065336000  | -1.850516000 |
| 6  | 1.149482000  | -0.727311000 | -2.672311000 |
| 1  | 2.014221000  | -0.101702000 | -2.921949000 |
| 1  | 0.671323000  | -1.026146000 | -3.616442000 |
| 6  | -0.374704000 | 1.203214000  | -2.599791000 |
| 1  | -0.780162000 | 0.857307000  | -3.561304000 |
| 1  | 0.419493000  | 1.926996000  | -2.815849000 |
| 6  | 1.457023000  | -2.842429000 | 0.886664000  |
| 1  | 0.381529000  | -2.817161000 | 0.672694000  |
| 6  | -0.579046000 | 3.908733000  | 0.209650000  |
| 1  | -1.576743000 | 4.355851000  | 0.300308000  |
| 6  | -1.485816000 | 1.837910000  | -1.761486000 |
| 1  | -2.326166000 | 1.141123000  | -1.694193000 |
| 1  | -1.849646000 | 2.766727000  | -2.207100000 |
| 6  | -2.304440000 | 1.540513000  | 1.008998000  |
| 1  | -2.430849000 | 0.516592000  | 0.633287000  |
| 6  | 1.573202000  | -1.969009000 | -1.886068000 |
| 1  | 2.351192000  | -2.534226000 | -2.405260000 |
| 1  | 0.703168000  | -2.621583000 | -1.759136000 |
| 6  | 4.463403000  | -0.696470000 | 1.118369000  |
| 1  | 4.223197000  | 0.368831000  | 1.045901000  |
| 1  | 5.553394000  | -0.793294000 | 1.181429000  |
| 1  | 4.039639000  | -1.070832000 | 2.052838000  |
| 6  | 4.572063000  | -0.877126000 | -1.400241000 |
| 1  | 4.301236000  | -1.446456000 | -2.293455000 |
| 1  | 5.664458000  | -0.902865000 | -1.313406000 |
| 1  | 4.278430000  | 0.165587000  | -1.553463000 |
| 6  | 3.949023000  | -1.456646000 | -0.117371000 |
| 1  | 4.241048000  | -2.510889000 | -0.036660000 |
| 6  | 2.183721000  | 1.641036000  | -0.482441000 |
| 6  | 1.397418000  | 0.884043000  | 1.751540000  |
| 6  | 1.635926000  | -2.603987000 | 2.393251000  |
| 1  | 2.687632000  | -2.665726000 | 2.692514000  |

|   |              |              |              |
|---|--------------|--------------|--------------|
| 1 | 1.092319000  | -3.377980000 | 2.946801000  |
| 1 | 1.242131000  | -1.633975000 | 2.705519000  |
| 6 | 2.009840000  | -4.215759000 | 0.471049000  |
| 1 | 1.879158000  | -4.415745000 | -0.596267000 |
| 1 | 1.481421000  | -5.002077000 | 1.022516000  |
| 1 | 3.075420000  | -4.309065000 | 0.708022000  |
| 6 | -3.588422000 | 2.338264000  | 0.733998000  |
| 1 | -3.513942000 | 3.364019000  | 1.111746000  |
| 1 | -4.430443000 | 1.858574000  | 1.247171000  |
| 1 | -3.835338000 | 2.383605000  | -0.331234000 |
| 6 | 0.134255000  | 4.544546000  | -0.997174000 |
| 1 | 1.123067000  | 4.103788000  | -1.153950000 |
| 1 | 0.275173000  | 5.615020000  | -0.809384000 |
| 1 | -0.436383000 | 4.447311000  | -1.924758000 |
| 6 | 0.214113000  | 4.179722000  | 1.500414000  |
| 1 | -0.249917000 | 3.734896000  | 2.383797000  |
| 1 | 0.286504000  | 5.260660000  | 1.667220000  |
| 1 | 1.231120000  | 3.782283000  | 1.420983000  |
| 6 | -2.007939000 | 1.460137000  | 2.513137000  |
| 1 | -1.105652000 | 0.880729000  | 2.722968000  |
| 1 | -2.845385000 | 0.966305000  | 3.019485000  |
| 1 | -1.895760000 | 2.452717000  | 2.961224000  |
| 1 | -3.550725000 | -1.096114000 | 1.888966000  |
| 1 | -0.603286000 | -0.579313000 | -1.545449000 |

-2063.350953

### TS18

|    |              |              |              |
|----|--------------|--------------|--------------|
| 1  | -1.885564000 | -2.010846000 | 0.910128000  |
| 1  | -4.193867000 | -2.466500000 | 2.485320000  |
| 7  | -4.292265000 | -2.461023000 | 0.409987000  |
| 1  | -5.283688000 | -2.606468000 | 0.578986000  |
| 6  | -4.116721000 | -1.607712000 | -0.781686000 |
| 1  | -4.167030000 | -0.540419000 | -0.494771000 |
| 6  | -5.239600000 | -1.899289000 | -1.781867000 |
| 1  | -5.216103000 | -2.950329000 | -2.093064000 |
| 1  | -6.222772000 | -1.695316000 | -1.342472000 |
| 1  | -5.136329000 | -1.275009000 | -2.675020000 |
| 6  | -2.744641000 | -1.833969000 | -1.443271000 |
| 1  | -2.683985000 | -2.897877000 | -1.735311000 |
| 1  | -2.722065000 | -1.239990000 | -2.373387000 |
| 6  | -3.671314000 | -1.994210000 | 1.647550000  |
| 8  | -1.661448000 | -1.472596000 | -0.617763000 |
| 8  | -2.306056000 | -2.347812000 | 1.751487000  |
| 25 | 1.020711000  | 0.610564000  | -0.025209000 |
| 15 | 2.063065000  | -1.448221000 | -0.163839000 |

|    |              |              |              |
|----|--------------|--------------|--------------|
| 15 | -0.755636000 | 2.085364000  | -0.030415000 |
| 8  | 2.967079000  | 2.247006000  | -1.448724000 |
| 8  | 2.191652000  | 1.444574000  | 2.553036000  |
| 7  | 0.080922000  | -0.070320000 | -1.735422000 |
| 6  | 0.910998000  | -0.930145000 | -2.603065000 |
| 1  | 1.732127000  | -0.338994000 | -3.035063000 |
| 1  | 0.311842000  | -1.311047000 | -3.445158000 |
| 6  | -0.565600000 | 0.983873000  | -2.544443000 |
| 1  | -1.099905000 | 0.535255000  | -3.396573000 |
| 1  | 0.200497000  | 1.651574000  | -2.966291000 |
| 6  | 1.356083000  | -2.700935000 | 1.044394000  |
| 1  | 0.319772000  | -2.773683000 | 0.691075000  |
| 6  | -0.614659000 | 3.940521000  | 0.118531000  |
| 1  | -1.629169000 | 4.330044000  | -0.035979000 |
| 6  | -1.550510000 | 1.786848000  | -1.690032000 |
| 1  | -2.462168000 | 1.205261000  | -1.523092000 |
| 1  | -1.837701000 | 2.722289000  | -2.178393000 |
| 6  | -2.094332000 | 1.514822000  | 1.150929000  |
| 1  | -2.346384000 | 0.545633000  | 0.703293000  |
| 6  | 1.470536000  | -2.108030000 | -1.801698000 |
| 1  | 2.263334000  | -2.629738000 | -2.345221000 |
| 1  | 0.671450000  | -2.825999000 | -1.595891000 |
| 6  | 4.560289000  | -1.251265000 | 1.138155000  |
| 1  | 4.334209000  | -0.204028000 | 1.365645000  |
| 1  | 5.649482000  | -1.353331000 | 1.069454000  |
| 1  | 4.223852000  | -1.863599000 | 1.978725000  |
| 6  | 4.545309000  | -0.911567000 | -1.367826000 |
| 1  | 4.087187000  | -1.163475000 | -2.329171000 |
| 1  | 5.610723000  | -1.159989000 | -1.433886000 |
| 1  | 4.461451000  | 0.168671000  | -1.225822000 |
| 6  | 3.916422000  | -1.676612000 | -0.190753000 |
| 1  | 4.084389000  | -2.749927000 | -0.344513000 |
| 6  | 2.198396000  | 1.593653000  | -0.852708000 |
| 6  | 1.703413000  | 1.093236000  | 1.549455000  |
| 6  | 1.308031000  | -2.200573000 | 2.496164000  |
| 1  | 2.305845000  | -2.053198000 | 2.919391000  |
| 1  | 0.787148000  | -2.937627000 | 3.117510000  |
| 1  | 0.764590000  | -1.256177000 | 2.575720000  |
| 6  | 2.008424000  | -4.088256000 | 0.937852000  |
| 1  | 2.037382000  | -4.455824000 | -0.093503000 |
| 1  | 1.436295000  | -4.810021000 | 1.532120000  |
| 1  | 3.032819000  | -4.080041000 | 1.325911000  |
| 6  | -3.341704000 | 2.409909000  | 1.147517000  |
| 1  | -3.141202000 | 3.378398000  | 1.618346000  |
| 1  | -4.144240000 | 1.925657000  | 1.716355000  |
| 1  | -3.717862000 | 2.594709000  | 0.135719000  |

|   |              |              |              |
|---|--------------|--------------|--------------|
| 6 | 0.301500000  | 4.504207000  | -0.980956000 |
| 1 | 1.338973000  | 4.199050000  | -0.821266000 |
| 1 | 0.265467000  | 5.599359000  | -0.959627000 |
| 1 | 0.005739000  | 4.182338000  | -1.984549000 |
| 6 | -0.118818000 | 4.363985000  | 1.509819000  |
| 1 | -0.822207000 | 4.092054000  | 2.300630000  |
| 1 | 0.009337000  | 5.452137000  | 1.540013000  |
| 1 | 0.848640000  | 3.904886000  | 1.739399000  |
| 6 | -1.590322000 | 1.234633000  | 2.574334000  |
| 1 | -0.750287000 | 0.536052000  | 2.568016000  |
| 1 | -2.396364000 | 0.780192000  | 3.161731000  |
| 1 | -1.271629000 | 2.143328000  | 3.092954000  |
| 1 | -3.776466000 | -0.896526000 | 1.749501000  |
| 1 | -0.842286000 | -0.810848000 | -1.188514000 |

-2063.352350

#### 41

|    |              |              |              |
|----|--------------|--------------|--------------|
| 1  | -1.414318000 | -2.451103000 | 0.911428000  |
| 1  | -3.643296000 | -2.948654000 | 2.564789000  |
| 7  | -3.804738000 | -2.942753000 | 0.493440000  |
| 1  | -4.765346000 | -3.203136000 | 0.692084000  |
| 6  | -3.749291000 | -2.066854000 | -0.691468000 |
| 1  | -3.728430000 | -1.009838000 | -0.372857000 |
| 6  | -4.990292000 | -2.286414000 | -1.562063000 |
| 1  | -5.057513000 | -3.332947000 | -1.882078000 |
| 1  | -5.902461000 | -2.036417000 | -1.009543000 |
| 1  | -4.956156000 | -1.657380000 | -2.457058000 |
| 6  | -2.481902000 | -2.328605000 | -1.521034000 |
| 1  | -2.493146000 | -3.374804000 | -1.854354000 |
| 1  | -2.495882000 | -1.686594000 | -2.411802000 |
| 6  | -3.178353000 | -2.446900000 | 1.711411000  |
| 8  | -1.277873000 | -2.101513000 | -0.788539000 |
| 8  | -1.787909000 | -2.725485000 | 1.780078000  |
| 25 | 0.799058000  | 0.619576000  | 0.045528000  |
| 15 | 2.257617000  | -1.168816000 | -0.186182000 |
| 15 | -1.089776000 | 1.956207000  | -0.024802000 |
| 8  | 2.715809000  | 2.728140000  | -0.554024000 |
| 8  | 1.294914000  | 1.001082000  | 2.931916000  |
| 7  | 0.177716000  | 0.028502000  | -1.725824000 |
| 6  | 1.108881000  | -0.677922000 | -2.625805000 |
| 1  | 1.839294000  | 0.029492000  | -3.053171000 |
| 1  | 0.558179000  | -1.108712000 | -3.478164000 |
| 6  | -0.689049000 | 0.909657000  | -2.526116000 |
| 1  | -1.122913000 | 0.352781000  | -3.373168000 |
| 1  | -0.100188000 | 1.731798000  | -2.966207000 |

|   |              |              |              |
|---|--------------|--------------|--------------|
| 6 | 1.928724000  | -2.694593000 | 0.864042000  |
| 1 | 0.884101000  | -2.904832000 | 0.600719000  |
| 6 | -0.950577000 | 3.823344000  | -0.045882000 |
| 1 | -1.973508000 | 4.208969000  | 0.046382000  |
| 6 | -1.818618000 | 1.469689000  | -1.663458000 |
| 1 | -2.546896000 | 0.678267000  | -1.461222000 |
| 1 | -2.351693000 | 2.289563000  | -2.153027000 |
| 6 | -2.491345000 | 1.541191000  | 1.154496000  |
| 1 | -2.539728000 | 0.451055000  | 1.037896000  |
| 6 | 1.827972000  | -1.802263000 | -1.879427000 |
| 1 | 2.697812000  | -2.174291000 | -2.427089000 |
| 1 | 1.136515000  | -2.637381000 | -1.734603000 |
| 6 | 4.539211000  | -0.138090000 | 1.097763000  |
| 1 | 4.091490000  | 0.859678000  | 1.130339000  |
| 1 | 5.629085000  | -0.020566000 | 1.107221000  |
| 1 | 4.253391000  | -0.662840000 | 2.012631000  |
| 6 | 4.581197000  | -0.144147000 | -1.434553000 |
| 1 | 4.371620000  | -0.699804000 | -2.352698000 |
| 1 | 5.665952000  | 0.005673000  | -1.381475000 |
| 1 | 4.114480000  | 0.840662000  | -1.516493000 |
| 6 | 4.109868000  | -0.891318000 | -0.173712000 |
| 1 | 4.573511000  | -1.884863000 | -0.172129000 |
| 6 | 1.949342000  | 1.879650000  | -0.283000000 |
| 6 | 1.073845000  | 0.821287000  | 1.794312000  |
| 6 | 1.988895000  | -2.458127000 | 2.379650000  |
| 1 | 3.012709000  | -2.274600000 | 2.720437000  |
| 1 | 1.626531000  | -3.352510000 | 2.899581000  |
| 1 | 1.367448000  | -1.616699000 | 2.689948000  |
| 6 | 2.781444000  | -3.910751000 | 0.463262000  |
| 1 | 2.755496000  | -4.109315000 | -0.612695000 |
| 1 | 2.406426000  | -4.804804000 | 0.974995000  |
| 1 | 3.827422000  | -3.778871000 | 0.760691000  |
| 6 | -3.851260000 | 2.133843000  | 0.747830000  |
| 1 | -3.858652000 | 3.223898000  | 0.854636000  |
| 1 | -4.632962000 | 1.735335000  | 1.405413000  |
| 1 | -4.131064000 | 1.891600000  | -0.281231000 |
| 6 | -0.358635000 | 4.332694000  | -1.372700000 |
| 1 | 0.640981000  | 3.924919000  | -1.546738000 |
| 1 | -0.270002000 | 5.424657000  | -1.334679000 |
| 1 | -0.985518000 | 4.083485000  | -2.233040000 |
| 6 | -0.116630000 | 4.326967000  | 1.146136000  |
| 1 | -0.506671000 | 3.986476000  | 2.107671000  |
| 1 | -0.113943000 | 5.423166000  | 1.155053000  |
| 1 | 0.920364000  | 3.989309000  | 1.066904000  |
| 6 | -2.195161000 | 1.837466000  | 2.632714000  |
| 1 | -1.222072000 | 1.459441000  | 2.950834000  |



|   |              |              |              |
|---|--------------|--------------|--------------|
| 1 | -2.961279000 | 1.361980000  | 3.256328000  |
| 1 | -2.232374000 | 2.912257000  | 2.837187000  |
| 1 | -3.337500000 | -1.357908000 | 1.821642000  |
| 1 | -0.803336000 | -1.272720000 | -1.115877000 |

-2063.351384

**42**

|    |              |              |              |
|----|--------------|--------------|--------------|
| 1  | 0.897588000  | -3.269365000 | -0.065905000 |
| 6  | -0.011676000 | -2.833495000 | 0.390942000  |
| 8  | -0.052206000 | -2.811347000 | 1.726088000  |
| 25 | 0.002657000  | 0.096387000  | -0.131292000 |
| 15 | -2.300116000 | -0.062288000 | 0.139604000  |
| 15 | 2.303577000  | -0.072203000 | 0.143978000  |
| 8  | 0.005525000  | 3.018951000  | -0.161762000 |
| 8  | 0.004543000  | 0.115036000  | -3.075158000 |
| 7  | -0.001717000 | -0.164444000 | 1.964473000  |
| 6  | -1.224098000 | 0.332307000  | 2.645051000  |
| 1  | -1.234664000 | 1.425386000  | 2.577749000  |
| 1  | -1.198996000 | 0.064297000  | 3.710973000  |
| 6  | 1.225295000  | 0.310750000  | 2.651495000  |
| 1  | 1.195286000  | 0.032198000  | 3.714582000  |
| 1  | 1.247859000  | 1.404233000  | 2.595848000  |
| 6  | -3.176920000 | -1.595098000 | -0.499736000 |
| 1  | -2.700520000 | -2.380729000 | 0.096994000  |
| 6  | 3.415082000  | 1.372888000  | -0.303917000 |
| 1  | 4.439416000  | 0.988625000  | -0.250509000 |
| 6  | 2.460378000  | -0.297428000 | 1.985473000  |
| 1  | 2.475042000  | -1.376347000 | 2.170516000  |
| 1  | 3.383678000  | 0.125893000  | 2.389403000  |
| 6  | 3.180896000  | -1.600445000 | -0.507439000 |
| 1  | 2.711613000  | -2.390642000 | 0.088982000  |
| 6  | -2.462967000 | -0.271252000 | 1.982210000  |
| 1  | -3.384062000 | 0.161214000  | 2.381197000  |
| 1  | -2.482756000 | -1.348848000 | 2.173899000  |
| 6  | -3.120885000 | 1.841703000  | -1.766446000 |
| 1  | -2.119360000 | 2.273561000  | -1.850619000 |
| 1  | -3.844735000 | 2.612027000  | -2.056759000 |
| 1  | -3.195223000 | 1.025635000  | -2.490037000 |
| 6  | -3.307222000 | 2.560254000  | 0.657516000  |
| 1  | -3.593044000 | 2.280808000  | 1.675374000  |
| 1  | -3.990586000 | 3.353695000  | 0.332856000  |
| 1  | -2.301452000 | 2.984559000  | 0.685719000  |
| 6  | -3.407119000 | 1.380668000  | -0.326273000 |
| 1  | -4.431880000 | 0.996531000  | -0.279665000 |
| 6  | 0.004731000  | 1.847001000  | -0.131479000 |

|   |              |              |              |
|---|--------------|--------------|--------------|
| 6 | 0.003911000  | 0.088147000  | -1.906119000 |
| 6 | -2.881286000 | -1.891964000 | -1.977067000 |
| 1 | -3.325947000 | -1.142691000 | -2.639847000 |
| 1 | -3.308535000 | -2.864436000 | -2.247975000 |
| 1 | -1.806878000 | -1.927454000 | -2.174158000 |
| 6 | -4.685467000 | -1.633926000 | -0.204491000 |
| 1 | -4.912481000 | -1.398495000 | 0.840575000  |
| 1 | -5.069896000 | -2.639541000 | -0.410640000 |
| 1 | -5.239462000 | -0.936237000 | -0.841233000 |
| 6 | 4.691581000  | -1.636026000 | -0.223394000 |
| 1 | 5.238816000  | -0.934845000 | -0.862127000 |
| 1 | 5.077231000  | -2.639923000 | -0.435443000 |
| 1 | 4.925615000  | -1.403041000 | 0.820677000  |
| 6 | 3.306877000  | 2.546412000  | 0.686073000  |
| 1 | 2.300612000  | 2.969564000  | 0.710408000  |
| 1 | 3.991453000  | 3.342596000  | 0.370867000  |
| 1 | 3.586532000  | 2.260932000  | 1.703974000  |
| 6 | 3.141293000  | 1.841313000  | -1.744122000 |
| 1 | 3.224994000  | 1.029227000  | -2.471187000 |
| 1 | 3.865906000  | 2.614912000  | -2.023435000 |
| 1 | 2.139505000  | 2.270973000  | -1.836158000 |
| 6 | 2.874667000  | -1.893374000 | -1.983338000 |
| 1 | 1.798851000  | -1.936509000 | -2.170349000 |
| 1 | 3.306996000  | -2.861344000 | -2.262056000 |
| 1 | 3.306949000  | -1.137930000 | -2.647162000 |
| 1 | -0.888659000 | -3.275305000 | -0.120126000 |
| 1 | -0.001989000 | -1.752014000 | -0.120424000 |
| 1 | -0.014465000 | -1.234091000 | 2.029503000  |

-1814.897849

### TS19

|    |              |              |              |
|----|--------------|--------------|--------------|
| 1  | 0.861485000  | -3.439770000 | 0.001873000  |
| 6  | 0.014246000  | -2.889824000 | 0.440516000  |
| 8  | 0.124645000  | -2.685857000 | 1.795979000  |
| 25 | -0.005298000 | 0.122096000  | -0.119783000 |
| 15 | -2.305232000 | -0.085328000 | 0.156158000  |
| 15 | 2.298967000  | -0.041130000 | 0.134307000  |
| 8  | -0.015250000 | 3.035589000  | -0.190528000 |
| 8  | -0.004597000 | 0.140074000  | -3.067926000 |
| 7  | 0.016185000  | -0.193743000 | 1.909913000  |
| 6  | -1.202751000 | 0.189308000  | 2.653796000  |
| 1  | -1.279218000 | 1.284721000  | 2.702617000  |
| 1  | -1.141106000 | -0.173968000 | 3.691838000  |
| 6  | 1.213173000  | 0.288520000  | 2.632154000  |
| 1  | 1.178903000  | -0.039491000 | 3.683050000  |

|   |              |              |              |
|---|--------------|--------------|--------------|
| 1 | 1.225168000  | 1.387752000  | 2.640032000  |
| 6 | -3.168137000 | -1.586897000 | -0.586218000 |
| 1 | -2.759439000 | -2.399763000 | 0.024244000  |
| 6 | 3.405409000  | 1.398852000  | -0.338310000 |
| 1 | 4.430752000  | 1.016849000  | -0.283879000 |
| 6 | 2.479473000  | -0.259731000 | 1.971270000  |
| 1 | 2.543920000  | -1.336535000 | 2.154787000  |
| 1 | 3.384901000  | 0.206794000  | 2.367990000  |
| 6 | 3.157104000  | -1.580293000 | -0.520874000 |
| 1 | 2.682726000  | -2.362258000 | 0.082538000  |
| 6 | -2.441421000 | -0.406978000 | 1.981205000  |
| 1 | -3.368608000 | -0.016248000 | 2.410152000  |
| 1 | -2.437059000 | -1.493191000 | 2.116412000  |
| 6 | -3.294522000 | 1.849479000  | -1.633406000 |
| 1 | -2.285458000 | 2.229039000  | -1.821908000 |
| 1 | -4.002550000 | 2.663371000  | -1.827636000 |
| 1 | -3.496187000 | 1.055570000  | -2.357890000 |
| 6 | -3.257302000 | 2.520106000  | 0.816333000  |
| 1 | -3.438857000 | 2.210082000  | 1.849109000  |
| 1 | -3.977501000 | 3.313048000  | 0.582282000  |
| 1 | -2.258103000 | 2.955197000  | 0.758069000  |
| 6 | -3.446259000 | 1.364365000  | -0.181668000 |
| 1 | -4.462287000 | 0.977969000  | -0.045754000 |
| 6 | -0.013158000 | 1.863176000  | -0.155993000 |
| 6 | -0.007038000 | 0.099474000  | -1.898279000 |
| 6 | -2.766929000 | -1.862605000 | -2.042359000 |
| 1 | -3.090065000 | -1.064257000 | -2.717341000 |
| 1 | -3.235952000 | -2.793359000 | -2.381965000 |
| 1 | -1.685140000 | -1.971564000 | -2.144770000 |
| 6 | -4.694668000 | -1.594071000 | -0.407221000 |
| 1 | -4.993669000 | -1.383256000 | 0.624986000  |
| 1 | -5.087552000 | -2.582376000 | -0.672566000 |
| 1 | -5.180313000 | -0.862657000 | -1.061970000 |
| 6 | 4.668314000  | -1.625088000 | -0.240145000 |
| 1 | 5.217568000  | -0.929052000 | -0.882845000 |
| 1 | 5.048046000  | -2.631906000 | -0.449245000 |
| 1 | 4.905934000  | -1.388978000 | 0.802377000  |
| 6 | 3.295390000  | 2.582446000  | 0.639970000  |
| 1 | 2.287395000  | 3.001785000  | 0.661360000  |
| 1 | 3.977313000  | 3.377390000  | 0.315839000  |
| 1 | 3.575533000  | 2.307992000  | 1.660614000  |
| 6 | 3.125319000  | 1.852495000  | -1.781744000 |
| 1 | 3.208788000  | 1.034145000  | -2.501707000 |
| 1 | 3.846319000  | 2.625980000  | -2.070752000 |
| 1 | 2.121819000  | 2.278175000  | -1.873181000 |
| 6 | 2.846616000  | -1.880339000 | -1.994034000 |

|   |              |              |              |
|---|--------------|--------------|--------------|
| 1 | 1.770550000  | -1.920580000 | -2.179163000 |
| 1 | 3.274491000  | -2.851734000 | -2.267917000 |
| 1 | 3.280278000  | -1.130690000 | -2.663426000 |
| 1 | -0.915059000 | -3.397628000 | 0.137353000  |
| 1 | -0.002925000 | -1.913786000 | -0.158523000 |
| 1 | 0.072752000  | -1.494958000 | 1.932960000  |

-1814.898095

**43**

|    |              |              |              |
|----|--------------|--------------|--------------|
| 1  | -0.910777000 | 3.900100000  | 0.032511000  |
| 6  | 0.012001000  | 3.350146000  | 0.263309000  |
| 8  | 0.062337000  | 2.989627000  | 1.635205000  |
| 25 | -0.002958000 | -0.252268000 | -0.070393000 |
| 15 | 2.292233000  | 0.019297000  | 0.151105000  |
| 15 | -2.296503000 | 0.026909000  | 0.154500000  |
| 8  | -0.005856000 | -3.155158000 | -0.331876000 |
| 8  | -0.004502000 | -0.158838000 | -3.020653000 |
| 7  | -0.000673000 | 0.196160000  | 1.828749000  |
| 6  | 1.198481000  | -0.033804000 | 2.658592000  |
| 1  | 1.288941000  | -1.106037000 | 2.896241000  |
| 1  | 1.100102000  | 0.491395000  | 3.622053000  |
| 6  | -1.198975000 | -0.024498000 | 2.661738000  |
| 1  | -1.096471000 | 0.505189000  | 3.622382000  |
| 1  | -1.293823000 | -1.095168000 | 2.905272000  |
| 6  | 3.112703000  | 1.505402000  | -0.672748000 |
| 1  | 2.638089000  | 2.336134000  | -0.136633000 |
| 6  | -3.470284000 | -1.410897000 | -0.091288000 |
| 1  | -4.474836000 | -1.015448000 | 0.097691000  |
| 6  | -2.456308000 | 0.473470000  | 1.949467000  |
| 1  | -2.501065000 | 1.565519000  | 2.008151000  |
| 1  | -3.371001000 | 0.076059000  | 2.399225000  |
| 6  | -3.115892000 | 1.513947000  | -0.668257000 |
| 1  | -2.639149000 | 2.343784000  | -0.132926000 |
| 6  | 2.456096000  | 0.463041000  | 1.945975000  |
| 1  | 3.370579000  | 0.063320000  | 2.393882000  |
| 1  | 2.500625000  | 1.554806000  | 2.005423000  |
| 6  | 3.391844000  | -1.944361000 | -1.541056000 |
| 1  | 2.382743000  | -2.290771000 | -1.785703000 |
| 1  | 4.078523000  | -2.789910000 | -1.664241000 |
| 1  | 3.673298000  | -1.180631000 | -2.271375000 |
| 6  | 3.204443000  | -2.549272000 | 0.917647000  |
| 1  | 3.308319000  | -2.208934000 | 1.951727000  |
| 1  | 3.938956000  | -3.347958000 | 0.759720000  |
| 1  | 2.210330000  | -2.985017000 | 0.798196000  |
| 6  | 3.462162000  | -1.421131000 | -0.097313000 |

|   |              |              |              |
|---|--------------|--------------|--------------|
| 1 | 4.467776000  | -1.027313000 | 0.088780000  |
| 6 | -0.005069000 | -1.983719000 | -0.242152000 |
| 6 | -0.003710000 | -0.146227000 | -1.848247000 |
| 6 | 2.783112000  | 1.677607000  | -2.161943000 |
| 1 | 3.174293000  | 0.856380000  | -2.770163000 |
| 1 | 3.237878000  | 2.605291000  | -2.529217000 |
| 1 | 1.707204000  | 1.739494000  | -2.333338000 |
| 6 | 4.627518000  | 1.584260000  | -0.419897000 |
| 1 | 4.881764000  | 1.450683000  | 0.636598000  |
| 1 | 5.000878000  | 2.566853000  | -0.730813000 |
| 1 | 5.169056000  | 0.829173000  | -1.000001000 |
| 6 | -4.630049000 | 1.596285000  | -0.412590000 |
| 1 | -5.174888000 | 0.843002000  | -0.991762000 |
| 1 | -5.001470000 | 2.579944000  | -0.722347000 |
| 1 | -4.882461000 | 1.462972000  | 0.644535000  |
| 6 | -3.211998000 | -2.540462000 | 0.921640000  |
| 1 | -2.220205000 | -2.980719000 | 0.796451000  |
| 1 | -3.950822000 | -3.335892000 | 0.767649000  |
| 1 | -3.307863000 | -2.200175000 | 1.956821000  |
| 6 | -3.404046000 | -1.932874000 | -1.535850000 |
| 1 | -3.693701000 | -1.170063000 | -2.263640000 |
| 1 | -4.086126000 | -2.782501000 | -1.656324000 |
| 1 | -2.394169000 | -2.272986000 | -1.785995000 |
| 6 | -2.786758000 | 1.686667000  | -2.157433000 |
| 1 | -1.710751000 | 1.747034000  | -2.328415000 |
| 1 | -3.239833000 | 2.615287000  | -2.523869000 |
| 1 | -3.179381000 | 0.866725000  | -2.766081000 |
| 1 | 0.866499000  | 3.987895000  | 0.004392000  |
| 1 | 0.044827000  | 2.463924000  | -0.393127000 |
| 1 | 0.023358000  | 1.992522000  | 1.693792000  |

-1814.901423

**44**

|   |              |              |              |
|---|--------------|--------------|--------------|
| 6 | -0.047180000 | 0.670788000  | 0.000000000  |
| 1 | -1.093105000 | 0.985939000  | 0.000000000  |
| 1 | 0.442724000  | 1.077847000  | 0.893939000  |
| 1 | 0.442724000  | 1.077847000  | -0.893939000 |
| 8 | -0.047180000 | -0.761869000 | 0.000000000  |
| 1 | 0.868171000  | -1.071407000 | 0.000000000  |

-115.713076

**45**

|    |             |              |              |
|----|-------------|--------------|--------------|
| 25 | 1.000570000 | 0.627660000  | 0.006006000  |
| 15 | 2.020081000 | -1.402164000 | -0.157450000 |

|    |              |              |              |
|----|--------------|--------------|--------------|
| 15 | -0.737311000 | 2.094590000  | 0.132424000  |
| 8  | 2.604626000  | 2.058862000  | -2.016773000 |
| 8  | 2.614872000  | 1.724157000  | 2.191656000  |
| 7  | -0.431114000 | -0.376558000 | -1.458650000 |
| 6  | 0.277873000  | -1.340197000 | -2.321529000 |
| 1  | 0.983962000  | -0.779670000 | -2.942565000 |
| 1  | -0.425067000 | -1.861423000 | -2.989763000 |
| 6  | -1.228525000 | 0.632863000  | -2.179492000 |
| 1  | -1.943009000 | 0.155409000  | -2.868437000 |
| 1  | -0.541119000 | 1.239757000  | -2.777007000 |
| 6  | 1.896589000  | -2.570233000 | 1.313457000  |
| 1  | 0.805831000  | -2.631925000 | 1.420072000  |
| 6  | -0.509253000 | 3.919377000  | -0.263364000 |
| 1  | -1.437059000 | 4.431185000  | 0.019832000  |
| 6  | -1.965554000 | 1.489214000  | -1.147778000 |
| 1  | -2.699494000 | 0.871387000  | -0.619419000 |
| 1  | -2.508826000 | 2.310062000  | -1.624016000 |
| 6  | -1.799492000 | 2.045132000  | 1.682997000  |
| 1  | -2.107793000 | 0.992188000  | 1.677122000  |
| 6  | 1.008411000  | -2.342820000 | -1.424408000 |
| 1  | 1.615702000  | -3.038173000 | -2.010195000 |
| 1  | 0.266180000  | -2.931821000 | -0.874161000 |
| 6  | 4.715639000  | -0.642939000 | 0.050835000  |
| 1  | 4.418231000  | 0.403645000  | -0.069544000 |
| 1  | 5.751198000  | -0.747189000 | -0.294780000 |
| 1  | 4.695560000  | -0.872889000 | 1.119312000  |
| 6  | 3.918373000  | -1.242541000 | -2.267705000 |
| 1  | 3.337111000  | -1.925900000 | -2.893737000 |
| 1  | 4.968032000  | -1.334370000 | -2.571978000 |
| 1  | 3.597818000  | -0.220871000 | -2.486271000 |
| 6  | 3.791832000  | -1.561679000 | -0.767266000 |
| 1  | 4.094956000  | -2.604248000 | -0.613827000 |
| 6  | 1.934284000  | 1.467260000  | -1.245609000 |
| 6  | 1.974421000  | 1.290838000  | 1.302658000  |
| 6  | 2.446055000  | -1.970336000 | 2.615033000  |
| 1  | 3.539452000  | -1.913599000 | 2.602856000  |
| 1  | 2.162792000  | -2.604300000 | 3.464094000  |
| 1  | 2.048637000  | -0.967574000 | 2.786427000  |
| 6  | 2.447795000  | -3.983715000 | 1.069846000  |
| 1  | 2.065389000  | -4.429291000 | 0.145777000  |
| 1  | 2.162629000  | -4.641428000 | 1.899990000  |
| 1  | 3.542047000  | -3.981681000 | 1.017770000  |
| 6  | -3.060629000 | 2.921121000  | 1.637722000  |
| 1  | -2.812667000 | 3.985938000  | 1.707254000  |
| 1  | -3.708353000 | 2.681301000  | 2.489738000  |
| 1  | -3.643483000 | 2.766111000  | 0.723992000  |

|   |              |              |              |
|---|--------------|--------------|--------------|
| 6 | -0.266729000 | 4.162038000  | -1.763686000 |
| 1 | 0.639533000  | 3.656712000  | -2.107246000 |
| 1 | -0.135950000 | 5.236336000  | -1.941701000 |
| 1 | -1.102360000 | 3.827923000  | -2.385627000 |
| 6 | 0.656006000  | 4.495486000  | 0.559638000  |
| 1 | 0.505642000  | 4.381580000  | 1.636289000  |
| 1 | 0.773382000  | 5.565259000  | 0.348377000  |
| 1 | 1.592086000  | 3.990487000  | 0.300170000  |
| 6 | -0.998483000 | 2.278559000  | 2.971696000  |
| 1 | -0.106797000 | 1.647910000  | 3.000991000  |
| 1 | -1.620611000 | 2.038712000  | 3.842729000  |
| 1 | -0.688365000 | 3.323877000  | 3.072481000  |
| 1 | -1.064172000 | -0.913116000 | -0.858370000 |
| 1 | 0.155420000  | -0.134591000 | 1.172004000  |
| 1 | -1.264497000 | -3.676790000 | 2.140399000  |
| 1 | -1.253163000 | -1.408364000 | 1.752577000  |
| 7 | -4.637151000 | -0.648551000 | 0.010766000  |
| 1 | -5.316276000 | -1.060827000 | 0.649972000  |
| 6 | -4.236244000 | -1.639768000 | -1.002473000 |
| 1 | -3.586318000 | -1.117941000 | -1.715945000 |
| 6 | -5.414645000 | -2.257169000 | -1.774083000 |
| 1 | -6.072369000 | -2.813490000 | -1.094450000 |
| 1 | -6.008927000 | -1.470428000 | -2.250560000 |
| 1 | -5.069545000 | -2.944132000 | -2.555821000 |
| 6 | -3.398582000 | -2.743182000 | -0.349940000 |
| 1 | -3.971349000 | -3.248889000 | 0.438729000  |
| 1 | -3.134660000 | -3.493891000 | -1.101512000 |
| 6 | -2.143029000 | -2.023181000 | 1.583228000  |
| 8 | -2.162536000 | -2.246341000 | 0.185138000  |
| 8 | -2.106827000 | -3.233945000 | 2.318540000  |
| 1 | -3.045898000 | -1.500085000 | 1.908047000  |
| 1 | -5.109158000 | 0.134368000  | -0.436789000 |

-2064.530630

## TS20

|    |              |              |              |
|----|--------------|--------------|--------------|
| 25 | 0.903281000  | 0.463437000  | 0.098390000  |
| 15 | 2.265744000  | -1.363488000 | -0.258449000 |
| 15 | -0.843411000 | 1.970864000  | 0.005589000  |
| 8  | 2.900401000  | 2.458405000  | -0.725140000 |
| 8  | 1.557021000  | 0.882528000  | 2.929450000  |
| 7  | 0.192438000  | -0.052436000 | -1.927367000 |
| 6  | 1.253319000  | -0.690700000 | -2.746854000 |
| 1  | 2.028891000  | 0.062094000  | -2.914901000 |
| 1  | 0.856334000  | -0.994545000 | -3.725466000 |
| 6  | -0.451143000 | 1.103543000  | -2.600197000 |

|   |              |              |              |
|---|--------------|--------------|--------------|
| 1 | -0.867911000 | 0.801339000  | -3.571180000 |
| 1 | 0.326670000  | 1.850242000  | -2.784461000 |
| 6 | 1.958712000  | -2.940162000 | 0.725836000  |
| 1 | 0.990795000  | -3.268134000 | 0.328386000  |
| 6 | -0.514950000 | 3.821282000  | 0.098954000  |
| 1 | -1.486649000 | 4.292240000  | 0.289434000  |
| 6 | -1.550810000 | 1.653540000  | -1.691843000 |
| 1 | -2.325595000 | 0.888206000  | -1.567499000 |
| 1 | -2.024354000 | 2.536158000  | -2.129709000 |
| 6 | -2.343059000 | 1.718401000  | 1.106020000  |
| 1 | -2.549319000 | 0.654200000  | 0.972975000  |
| 6 | 1.816563000  | -1.897847000 | -1.994333000 |
| 1 | 2.661614000  | -2.336641000 | -2.531810000 |
| 1 | 1.046268000  | -2.673939000 | -1.917247000 |
| 6 | 4.614048000  | -0.510044000 | 1.014663000  |
| 1 | 4.204257000  | 0.500250000  | 1.108968000  |
| 1 | 5.707733000  | -0.436404000 | 1.017378000  |
| 1 | 4.316437000  | -1.074548000 | 1.902848000  |
| 6 | 4.651043000  | -0.405677000 | -1.517167000 |
| 1 | 4.379341000  | -0.891497000 | -2.458785000 |
| 1 | 5.746060000  | -0.365236000 | -1.477909000 |
| 1 | 4.285403000  | 0.622355000  | -1.541455000 |
| 6 | 4.135505000  | -1.173820000 | -0.287679000 |
| 1 | 4.545191000  | -2.188195000 | -0.339743000 |
| 6 | 2.099925000  | 1.647994000  | -0.434509000 |
| 6 | 1.305997000  | 0.720025000  | 1.795708000  |
| 6 | 1.774829000  | -2.675694000 | 2.227784000  |
| 1 | 2.710035000  | -2.361729000 | 2.702171000  |
| 1 | 1.444162000  | -3.593896000 | 2.727063000  |
| 1 | 1.030520000  | -1.896210000 | 2.406548000  |
| 6 | 2.961681000  | -4.075901000 | 0.470168000  |
| 1 | 3.122692000  | -4.258174000 | -0.597653000 |
| 1 | 2.583097000  | -5.004203000 | 0.913405000  |
| 1 | 3.931972000  | -3.865460000 | 0.932227000  |
| 6 | -3.592402000 | 2.506757000  | 0.678202000  |
| 1 | -3.460312000 | 3.585179000  | 0.815950000  |
| 1 | -4.444280000 | 2.202799000  | 1.298604000  |
| 1 | -3.865605000 | 2.330256000  | -0.366453000 |
| 6 | 0.043055000  | 4.404159000  | -1.211543000 |
| 1 | 1.001980000  | 3.951962000  | -1.477345000 |
| 1 | 0.211154000  | 5.480226000  | -1.085021000 |
| 1 | -0.644275000 | 4.278320000  | -2.052715000 |
| 6 | 0.424747000  | 4.147893000  | 1.275080000  |
| 1 | 0.077434000  | 3.727483000  | 2.221329000  |
| 1 | 0.497086000  | 5.235146000  | 1.396543000  |
| 1 | 1.430733000  | 3.762411000  | 1.090447000  |



|   |              |              |              |
|---|--------------|--------------|--------------|
| 6 | -2.033594000 | 1.940605000  | 2.594524000  |
| 1 | -1.136395000 | 1.403489000  | 2.911040000  |
| 1 | -2.873159000 | 1.578247000  | 3.198764000  |
| 1 | -1.901955000 | 3.003778000  | 2.822038000  |
| 1 | -0.537246000 | -0.753443000 | -1.785197000 |
| 1 | -0.281790000 | -0.673201000 | 0.640544000  |
| 1 | -1.582632000 | -2.206928000 | 2.526964000  |
| 1 | -0.778429000 | -2.505810000 | 0.475805000  |
| 7 | -4.078237000 | -0.812139000 | -1.037097000 |
| 1 | -4.385459000 | -0.250856000 | -0.241828000 |
| 6 | -4.683168000 | -2.160995000 | -0.928497000 |
| 1 | -4.384624000 | -2.711406000 | -1.830695000 |
| 6 | -6.218021000 | -2.114665000 | -0.850099000 |
| 1 | -6.539365000 | -1.623438000 | 0.078228000  |
| 1 | -6.638826000 | -1.550939000 | -1.691168000 |
| 1 | -6.650385000 | -3.122306000 | -0.866394000 |
| 6 | -4.081442000 | -2.913278000 | 0.282644000  |
| 1 | -4.247496000 | -2.263935000 | 1.175551000  |
| 1 | -4.720058000 | -3.805864000 | 0.452001000  |
| 6 | -1.471506000 | -1.712571000 | 0.686179000  |
| 8 | -2.754203000 | -3.279089000 | 0.150507000  |
| 8 | -1.912170000 | -1.505549000 | 1.948194000  |
| 1 | -2.006075000 | -1.183302000 | -0.086796000 |
| 1 | -4.444444000 | -0.338132000 | -1.861695000 |

-2064.457000

**46**

|    |              |              |              |
|----|--------------|--------------|--------------|
| 25 | -0.369254000 | -0.756062000 | -0.277304000 |
| 15 | -2.372338000 | 0.418251000  | -0.282599000 |
| 15 | 1.906414000  | -1.225463000 | -0.248997000 |
| 8  | -1.199583000 | -2.981913000 | -1.961013000 |
| 8  | -0.976689000 | -2.262927000 | 2.182461000  |
| 7  | 0.168029000  | 0.615715000  | -1.553351000 |
| 6  | -0.832769000 | 1.343374000  | -2.348303000 |
| 1  | -1.209886000 | 0.710921000  | -3.169899000 |
| 1  | -0.373246000 | 2.225508000  | -2.824366000 |
| 6  | 1.393937000  | 0.444191000  | -2.347914000 |
| 1  | 1.652425000  | 1.384189000  | -2.862468000 |
| 1  | 1.237062000  | -0.304547000 | -3.142518000 |
| 6  | -2.825402000 | 1.358512000  | 1.278393000  |
| 1  | -1.856138000 | 1.812416000  | 1.525207000  |
| 6  | 2.530603000  | -2.895528000 | -0.826012000 |
| 1  | 3.598070000  | -2.932364000 | -0.575562000 |
| 6  | 2.553959000  | 0.038063000  | -1.442706000 |
| 1  | 2.862939000  | 0.905298000  | -0.849672000 |

|   |              |              |              |
|---|--------------|--------------|--------------|
| 1 | 3.422637000  | -0.317880000 | -2.004030000 |
| 6 | 2.871650000  | -0.809791000 | 1.309240000  |
| 1 | 2.474723000  | 0.185719000  | 1.547534000  |
| 6 | -1.984400000 | 1.802955000  | -1.456858000 |
| 1 | -2.855690000 | 2.133151000  | -2.029470000 |
| 1 | -1.649183000 | 2.645464000  | -0.844597000 |
| 6 | -4.213436000 | -1.709058000 | -0.165221000 |
| 1 | -3.423563000 | -2.437165000 | -0.370694000 |
| 1 | -5.163241000 | -2.135160000 | -0.508668000 |
| 1 | -4.276746000 | -1.581794000 | 0.917488000  |
| 6 | -3.882892000 | -0.630047000 | -2.426044000 |
| 1 | -3.791467000 | 0.298043000  | -2.996638000 |
| 1 | -4.804440000 | -1.126961000 | -2.751079000 |
| 1 | -3.044426000 | -1.280684000 | -2.691268000 |
| 6 | -3.942787000 | -0.386947000 | -0.906995000 |
| 1 | -4.760547000 | 0.314309000  | -0.697902000 |
| 6 | -0.873962000 | -2.105824000 | -1.249273000 |
| 6 | -0.725129000 | -1.648626000 | 1.208095000  |
| 6 | -3.258979000 | 0.468493000  | 2.453647000  |
| 1 | -4.279106000 | 0.097587000  | 2.312054000  |
| 1 | -3.253522000 | 1.057252000  | 3.378184000  |
| 1 | -2.603063000 | -0.390326000 | 2.600578000  |
| 6 | -3.855581000 | 2.479992000  | 1.056240000  |
| 1 | -3.565439000 | 3.173312000  | 0.262555000  |
| 1 | -3.964741000 | 3.061515000  | 1.979471000  |
| 1 | -4.842069000 | 2.072482000  | 0.808943000  |
| 6 | 4.388382000  | -0.684559000 | 1.081943000  |
| 1 | 4.837758000  | -1.652739000 | 0.834739000  |
| 1 | 4.864938000  | -0.330258000 | 2.003852000  |
| 1 | 4.639951000  | 0.023232000  | 0.288018000  |
| 6 | 2.382628000  | -3.057209000 | -2.349630000 |
| 1 | 1.337507000  | -2.966777000 | -2.659508000 |
| 1 | 2.731431000  | -4.053531000 | -2.645572000 |
| 1 | 2.970239000  | -2.323035000 | -2.907261000 |
| 6 | 1.806260000  | -4.039630000 | -0.092926000 |
| 1 | 1.880825000  | -3.960650000 | 0.993714000  |
| 1 | 2.243032000  | -5.000335000 | -0.390051000 |
| 1 | 0.744613000  | -4.058162000 | -0.354279000 |
| 6 | 2.585776000  | -1.742972000 | 2.495920000  |
| 1 | 1.519959000  | -1.901278000 | 2.664705000  |
| 1 | 3.002615000  | -1.305865000 | 3.410294000  |
| 1 | 3.063064000  | -2.718300000 | 2.354307000  |
| 1 | 0.557483000  | 1.787614000  | -0.058691000 |
| 1 | 0.319040000  | 0.405561000  | 2.525185000  |
| 1 | -0.575354000 | -1.073814000 | 3.945850000  |
| 1 | -0.710415000 | 1.403903000  | 3.572045000  |

|   |              |              |              |
|---|--------------|--------------|--------------|
| 7 | 3.342320000  | 3.340710000  | -0.101517000 |
| 1 | 3.593025000  | 3.913104000  | 0.704174000  |
| 6 | 2.091392000  | 3.838402000  | -0.697919000 |
| 1 | 1.870615000  | 3.188386000  | -1.554827000 |
| 6 | 2.173745000  | 5.290288000  | -1.199151000 |
| 1 | 2.359591000  | 5.976461000  | -0.363063000 |
| 1 | 2.993643000  | 5.402072000  | -1.916815000 |
| 1 | 1.245009000  | 5.597773000  | -1.694726000 |
| 6 | 0.935588000  | 3.693178000  | 0.302647000  |
| 1 | 1.158988000  | 4.282355000  | 1.202161000  |
| 1 | 0.030190000  | 4.127297000  | -0.152472000 |
| 6 | 0.142352000  | 0.713497000  | 3.560666000  |
| 8 | 0.694854000  | 2.363591000  | 0.734297000  |
| 8 | -0.076396000 | -0.401533000 | 4.431639000  |
| 1 | 1.029298000  | 1.244345000  | 3.917129000  |
| 1 | 4.106298000  | 3.434851000  | -0.767574000 |

-2064.538294

**47**

|    |              |              |              |
|----|--------------|--------------|--------------|
| 25 | 0.718141000  | 0.779214000  | 0.139465000  |
| 15 | 2.173608000  | -0.951941000 | -0.182517000 |
| 15 | -1.200918000 | 1.993911000  | -0.051800000 |
| 8  | 2.614210000  | 2.984096000  | -0.361120000 |
| 8  | 1.055149000  | 1.036958000  | 3.037797000  |
| 7  | 0.239560000  | 0.338435000  | -2.046621000 |
| 6  | 1.421019000  | -0.192996000 | -2.757365000 |
| 1  | 2.169919000  | 0.603714000  | -2.790286000 |
| 1  | 1.168334000  | -0.467189000 | -3.792484000 |
| 6  | -0.413024000 | 1.500292000  | -2.684641000 |
| 1  | -0.684219000 | 1.278931000  | -3.727592000 |
| 1  | 0.310971000  | 2.320640000  | -2.687478000 |
| 6  | 1.802389000  | -2.591188000 | 0.651989000  |
| 1  | 0.789655000  | -2.788739000 | 0.281764000  |
| 6  | -1.238949000 | 3.839829000  | 0.311222000  |
| 1  | -2.291531000 | 4.147256000  | 0.290929000  |
| 6  | -1.656045000 | 1.872449000  | -1.870524000 |
| 1  | -2.409264000 | 1.082813000  | -1.971448000 |
| 1  | -2.111351000 | 2.792756000  | -2.245203000 |
| 6  | -2.751363000 | 1.298103000  | 0.748742000  |
| 1  | -2.808507000 | 0.312149000  | 0.274950000  |
| 6  | 1.944854000  | -1.408699000 | -1.987550000 |
| 1  | 2.861170000  | -1.797785000 | -2.439778000 |
| 1  | 1.200024000  | -2.212811000 | -2.024106000 |
| 6  | 4.341188000  | -0.077330000 | 1.372015000  |
| 1  | 3.878558000  | 0.911238000  | 1.454519000  |

|   |              |              |              |
|---|--------------|--------------|--------------|
| 1 | 5.424674000  | 0.040379000  | 1.493399000  |
| 1 | 3.975940000  | -0.686338000 | 2.202996000  |
| 6 | 4.623143000  | 0.155442000  | -1.126316000 |
| 1 | 4.495913000  | -0.299584000 | -2.112975000 |
| 1 | 5.700228000  | 0.280027000  | -0.961676000 |
| 1 | 4.174492000  | 1.151850000  | -1.146866000 |
| 6 | 4.029555000  | -0.705110000 | 0.002488000  |
| 1 | 4.491706000  | -1.698256000 | -0.047395000 |
| 6 | 1.851453000  | 2.096982000  | -0.209347000 |
| 6 | 0.929354000  | 0.944410000  | 1.870889000  |
| 6 | 1.710166000  | -2.485775000 | 2.181318000  |
| 1 | 2.696350000  | -2.364696000 | 2.642355000  |
| 1 | 1.265435000  | -3.404362000 | 2.580943000  |
| 1 | 1.082441000  | -1.645917000 | 2.486851000  |
| 6 | 2.710213000  | -3.757055000 | 0.229469000  |
| 1 | 2.794048000  | -3.851676000 | -0.858324000 |
| 1 | 2.298239000  | -4.698450000 | 0.613023000  |
| 1 | 3.720591000  | -3.653125000 | 0.640065000  |
| 6 | -4.046288000 | 2.061996000  | 0.433618000  |
| 1 | -4.084967000 | 3.022362000  | 0.959423000  |
| 1 | -4.907741000 | 1.470179000  | 0.764098000  |
| 1 | -4.169236000 | 2.256055000  | -0.637300000 |
| 6 | -0.480011000 | 4.663229000  | -0.744262000 |
| 1 | 0.576931000  | 4.388498000  | -0.781460000 |
| 1 | -0.537759000 | 5.727129000  | -0.484191000 |
| 1 | -0.899180000 | 4.551817000  | -1.748506000 |
| 6 | -0.662267000 | 4.114953000  | 1.710878000  |
| 1 | -1.195427000 | 3.576634000  | 2.498612000  |
| 1 | -0.724102000 | 5.186243000  | 1.936970000  |
| 1 | 0.390058000  | 3.816888000  | 1.757229000  |
| 6 | -2.601033000 | 1.052369000  | 2.256511000  |
| 1 | -1.681800000 | 0.506198000  | 2.479963000  |
| 1 | -3.449511000 | 0.456780000  | 2.614090000  |
| 1 | -2.597586000 | 1.988940000  | 2.823436000  |
| 1 | -0.331232000 | -0.421126000 | 0.476624000  |
| 1 | -0.446136000 | -0.413408000 | -1.994864000 |
| 1 | -1.740516000 | -4.499452000 | 2.589927000  |
| 1 | -1.305248000 | -2.182988000 | 1.965161000  |
| 7 | -1.709909000 | -2.669649000 | 0.017709000  |
| 1 | -1.317981000 | -1.738563000 | -0.130248000 |
| 6 | -2.755722000 | -3.060659000 | -0.925943000 |
| 1 | -3.221831000 | -3.970022000 | -0.521803000 |
| 6 | -2.131657000 | -3.401851000 | -2.288166000 |
| 1 | -1.634030000 | -2.522535000 | -2.718367000 |
| 1 | -1.381049000 | -4.188251000 | -2.170169000 |
| 1 | -2.888015000 | -3.742004000 | -3.004619000 |

|   |              |              |              |
|---|--------------|--------------|--------------|
| 6 | -3.856698000 | -2.000785000 | -1.118016000 |
| 1 | -3.414023000 | -1.083912000 | -1.523110000 |
| 1 | -4.593722000 | -2.362064000 | -1.850286000 |
| 6 | -1.899029000 | -2.919493000 | 1.410540000  |
| 8 | -4.506969000 | -1.607554000 | 0.095429000  |
| 8 | -1.429548000 | -4.259307000 | 1.705181000  |
| 1 | -2.948522000 | -2.844471000 | 1.730150000  |
| 1 | -5.032839000 | -2.351364000 | 0.419981000  |

-2064.526519

**TS21**

|    |              |              |              |
|----|--------------|--------------|--------------|
| 25 | -0.191583000 | -0.866793000 | -0.118566000 |
| 15 | -2.381330000 | -0.132663000 | -0.299185000 |
| 15 | 2.122633000  | -0.931289000 | -0.114199000 |
| 8  | -0.639150000 | -3.595853000 | -1.028026000 |
| 8  | -0.447358000 | -1.706731000 | 2.701297000  |
| 7  | 0.049886000  | 0.161580000  | -1.731806000 |
| 6  | -1.074743000 | 0.450807000  | -2.632537000 |
| 1  | -1.324486000 | -0.435952000 | -3.240146000 |
| 1  | -0.797875000 | 1.242739000  | -3.348156000 |
| 6  | 1.301625000  | 0.133646000  | -2.497791000 |
| 1  | 1.351506000  | 1.002294000  | -3.176016000 |
| 1  | 1.342266000  | -0.758759000 | -3.146245000 |
| 6  | -3.001767000 | 1.108706000  | 0.967638000  |
| 1  | -2.149905000 | 1.801103000  | 1.012578000  |
| 6  | 3.039081000  | -2.538294000 | -0.420807000 |
| 1  | 4.103966000  | -2.323522000 | -0.266200000 |
| 6  | 2.505117000  | 0.166880000  | -1.557441000 |
| 1  | 2.618253000  | 1.174065000  | -1.145978000 |
| 1  | 3.440392000  | -0.099040000 | -2.058807000 |
| 6  | 3.042890000  | -0.066944000 | 1.280760000  |
| 1  | 2.461536000  | 0.859837000  | 1.379332000  |
| 6  | -2.291972000 | 0.909591000  | -1.830696000 |
| 1  | -3.215659000 | 0.890839000  | -2.415670000 |
| 1  | -2.129454000 | 1.936290000  | -1.492179000 |
| 6  | -3.763488000 | -2.455879000 | 0.511589000  |
| 1  | -2.857867000 | -3.064552000 | 0.439063000  |
| 1  | -4.626135000 | -3.118049000 | 0.371223000  |
| 1  | -3.814854000 | -2.052434000 | 1.525221000  |
| 6  | -3.703463000 | -1.984096000 | -1.972641000 |
| 1  | -3.819555000 | -1.241894000 | -2.767227000 |
| 1  | -4.508709000 | -2.719397000 | -2.086602000 |
| 1  | -2.754146000 | -2.505042000 | -2.127300000 |
| 6  | -3.775195000 | -1.357902000 | -0.567800000 |
| 1  | -4.711526000 | -0.791349000 | -0.488029000 |

|   |              |              |              |
|---|--------------|--------------|--------------|
| 6 | -0.462512000 | -2.508380000 | -0.614618000 |
| 6 | -0.342573000 | -1.335170000 | 1.591360000  |
| 6 | -3.228766000 | 0.519893000  | 2.368779000  |
| 1 | -4.137976000 | -0.089736000 | 2.397573000  |
| 1 | -3.357699000 | 1.334977000  | 3.089311000  |
| 1 | -2.393378000 | -0.092123000 | 2.711029000  |
| 6 | -4.244732000 | 1.896247000  | 0.515777000  |
| 1 | -4.106148000 | 2.397138000  | -0.446324000 |
| 1 | -4.474266000 | 2.669058000  | 1.259255000  |
| 1 | -5.124485000 | 1.247586000  | 0.438629000  |
| 6 | 4.493975000  | 0.310200000  | 0.935403000  |
| 1 | 5.116653000  | -0.580782000 | 0.798027000  |
| 1 | 4.926857000  | 0.885965000  | 1.762412000  |
| 1 | 4.566745000  | 0.923732000  | 0.034267000  |
| 6 | 2.843751000  | -3.018232000 | -1.870547000 |
| 1 | 1.784487000  | -3.170721000 | -2.097796000 |
| 1 | 3.355145000  | -3.977988000 | -2.009489000 |
| 1 | 3.254049000  | -2.317132000 | -2.602318000 |
| 6 | 2.603390000  | -3.636155000 | 0.567407000  |
| 1 | 2.735849000  | -3.345618000 | 1.611528000  |
| 1 | 3.199707000  | -4.540086000 | 0.395280000  |
| 1 | 1.551673000  | -3.896244000 | 0.422306000  |
| 6 | 2.990647000  | -0.810647000 | 2.625080000  |
| 1 | 1.986841000  | -1.154539000 | 2.880831000  |
| 1 | 3.333489000  | -0.142825000 | 3.424329000  |
| 1 | 3.660663000  | -1.676334000 | 2.620612000  |
| 1 | -0.370348000 | 1.362401000  | 2.505736000  |
| 1 | 0.132207000  | 2.058944000  | -0.601650000 |
| 1 | -0.132619000 | 2.028664000  | 5.259573000  |
| 1 | 1.120902000  | 1.199327000  | 3.452479000  |
| 7 | 0.181983000  | 2.901165000  | -0.017170000 |
| 1 | 0.919351000  | 2.712680000  | 0.658808000  |
| 6 | 0.564700000  | 4.068501000  | -0.821202000 |
| 1 | 0.614978000  | 4.930472000  | -0.138658000 |
| 6 | -0.503437000 | 4.350222000  | -1.881711000 |
| 1 | -0.573692000 | 3.514018000  | -2.587623000 |
| 1 | -1.482497000 | 4.481659000  | -1.411624000 |
| 1 | -0.267891000 | 5.254221000  | -2.453328000 |
| 6 | 1.942499000  | 3.928023000  | -1.491123000 |
| 1 | 1.915197000  | 3.106672000  | -2.215099000 |
| 1 | 2.199239000  | 4.850008000  | -2.032812000 |
| 6 | 0.197443000  | 1.779334000  | 3.338282000  |
| 8 | 2.980296000  | 3.586677000  | -0.560692000 |
| 8 | -0.629929000 | 1.690420000  | 4.503500000  |
| 1 | 0.450058000  | 2.820616000  | 3.099573000  |
| 1 | 3.130419000  | 4.340500000  | 0.026449000  |

-2064.530188

**48**

|    |              |              |              |
|----|--------------|--------------|--------------|
| 25 | -0.192992000 | -0.900372000 | -0.086806000 |
| 15 | -2.377516000 | -0.151742000 | -0.246962000 |
| 15 | 2.119795000  | -0.946917000 | -0.080480000 |
| 8  | -0.630633000 | -3.589425000 | -1.109855000 |
| 8  | -0.478317000 | -1.888337000 | 2.682043000  |
| 7  | 0.047319000  | 0.152305000  | -1.691168000 |
| 6  | -1.083969000 | 0.435335000  | -2.584785000 |
| 1  | -1.337683000 | -0.454363000 | -3.187022000 |
| 1  | -0.813980000 | 1.224257000  | -3.306227000 |
| 6  | 1.292224000  | 0.106476000  | -2.466607000 |
| 1  | 1.345004000  | 0.968752000  | -3.152732000 |
| 1  | 1.320778000  | -0.792072000 | -3.107678000 |
| 6  | -2.968286000 | 1.085204000  | 1.037313000  |
| 1  | -2.118941000 | 1.780828000  | 1.064568000  |
| 6  | 3.040339000  | -2.556088000 | -0.355771000 |
| 1  | 4.103706000  | -2.340393000 | -0.192961000 |
| 6  | 2.503985000  | 0.135074000  | -1.536113000 |
| 1  | 2.633383000  | 1.144000000  | -1.133438000 |
| 1  | 3.431312000  | -0.146721000 | -2.043189000 |
| 6  | 3.030994000  | -0.052790000 | 1.300937000  |
| 1  | 2.485926000  | 0.899857000  | 1.331855000  |
| 6  | -2.296434000 | 0.895769000  | -1.775409000 |
| 1  | -3.223317000 | 0.879182000  | -2.355305000 |
| 1  | -2.129403000 | 1.921168000  | -1.434934000 |
| 6  | -3.742062000 | -2.475275000 | 0.575220000  |
| 1  | -2.828606000 | -3.070667000 | 0.488958000  |
| 1  | -4.597607000 | -3.147971000 | 0.441614000  |
| 1  | -3.786101000 | -2.077714000 | 1.591521000  |
| 6  | -3.740775000 | -1.989659000 | -1.906666000 |
| 1  | -3.854630000 | -1.240828000 | -2.695358000 |
| 1  | -4.562195000 | -2.708123000 | -2.012051000 |
| 1  | -2.804703000 | -2.528671000 | -2.079481000 |
| 6  | -3.779193000 | -1.371237000 | -0.497139000 |
| 1  | -4.713041000 | -0.804559000 | -0.392845000 |
| 6  | -0.457587000 | -2.518379000 | -0.654203000 |
| 6  | -0.359361000 | -1.454077000 | 1.595883000  |
| 6  | -3.156418000 | 0.492591000  | 2.442280000  |
| 1  | -4.060436000 | -0.123021000 | 2.495105000  |
| 1  | -3.269771000 | 1.307421000  | 3.165725000  |
| 1  | -2.307885000 | -0.115903000 | 2.757941000  |
| 6  | -4.223849000 | 1.870244000  | 0.617629000  |
| 1  | -4.111188000 | 2.367477000  | -0.349815000 |

|   |              |              |              |
|---|--------------|--------------|--------------|
| 1 | -4.432702000 | 2.645847000  | 1.364158000  |
| 1 | -5.105445000 | 1.221307000  | 0.566635000  |
| 6 | 4.505213000  | 0.250669000  | 0.982409000  |
| 1 | 5.102292000  | -0.666703000 | 0.942091000  |
| 1 | 4.927142000  | 0.879677000  | 1.775487000  |
| 1 | 4.631021000  | 0.784353000  | 0.037039000  |
| 6 | 2.862117000  | -3.059870000 | -1.799527000 |
| 1 | 1.807168000  | -3.226422000 | -2.035013000 |
| 1 | 3.384678000  | -4.016114000 | -1.919176000 |
| 1 | 3.271978000  | -2.365521000 | -2.537847000 |
| 6 | 2.590262000  | -3.632475000 | 0.648753000  |
| 1 | 2.720465000  | -3.322500000 | 1.687898000  |
| 1 | 3.177674000  | -4.545767000 | 0.496833000  |
| 1 | 1.535719000  | -3.883348000 | 0.504333000  |
| 6 | 2.905695000  | -0.722448000 | 2.678203000  |
| 1 | 1.878660000  | -1.000379000 | 2.920641000  |
| 1 | 3.261512000  | -0.033353000 | 3.453111000  |
| 1 | 3.526799000  | -1.621946000 | 2.736664000  |
| 1 | -0.076788000 | 1.253759000  | 2.239481000  |
| 1 | 0.139361000  | 2.053355000  | -0.590234000 |
| 1 | -0.334396000 | 2.964834000  | 4.495373000  |
| 1 | -0.094216000 | 0.693489000  | 3.919405000  |
| 7 | 0.152036000  | 2.919186000  | -0.038751000 |
| 1 | 0.852148000  | 2.772466000  | 0.685064000  |
| 6 | 0.557365000  | 4.060176000  | -0.867835000 |
| 1 | 0.590871000  | 4.942042000  | -0.210214000 |
| 6 | -0.482118000 | 4.311829000  | -1.963977000 |
| 1 | -0.543487000 | 3.451106000  | -2.640304000 |
| 1 | -1.470912000 | 4.468448000  | -1.522861000 |
| 1 | -0.224823000 | 5.192499000  | -2.562314000 |
| 6 | 1.952136000  | 3.899021000  | -1.497391000 |
| 1 | 1.941348000  | 3.059828000  | -2.200785000 |
| 1 | 2.225476000  | 4.806363000  | -2.055747000 |
| 6 | 0.186746000  | 1.525710000  | 3.263328000  |
| 8 | 2.964974000  | 3.579787000  | -0.532621000 |
| 8 | -0.528967000 | 2.723669000  | 3.580457000  |
| 1 | 1.272459000  | 1.675677000  | 3.321003000  |
| 1 | 3.091909000  | 4.343467000  | 0.046860000  |

-2064.533954



## 17. References

1. S. Elangovan, C. Topf, S. Fischer, H. Jiao, A. Spannenberg, W. Baumann, R. Ludwig, K. Junge and M. Beller, *J. Am. Chem. Soc.*, 2016, **138**, 8809–8814.
2. W. J. Hehre, K. Ditchfield and J. A. Pople, *J. Chem. Phys.*, 1972, **56**, 2257–2261.
3. P. C. Hariharan and J. A. Pople, *Theor. Chim. Acta*, 1973, **28**, 213–222.
4. R. Krishnan, J. S. Binkley, R. Seeger and J. A. Pople, *J. Chem. Phys.*, 1980, **72**, 650–654.
5. P. J. Hay and W. R. Wadt, *J. Chem. Phys.*, 1985, **82**, 299–310.
6. P. J. Hay and W. R. Wadt, *J. Chem. Phys.*, 1985, **82**, 270–283.
7. M. Cossi, N. Rega, G. Scalmani and V. Barone, *J. Comput. Chem.*, 2003, **24**, 669–681.
8. V. Barone and M. Cossi, *J. Phys. Chem. A*, 1998, **102**, 1995–2001.
9. A. V. Marenich, C. J. Cramer and D. G. Truhlar, *J. Phys. Chem. B*, 2009, **113**, 6378–6396.
10. A. D. Becke, *Phys. Rev. A*, 1988, **38**, 3098–3100.
11. A. D. Becke, *J. Chem. Phys.*, 1993, **98**, 5648–5652.
12. A. D. Becke, *J. Chem. Phys.*, 1997, **107**, 8554–8560.
13. A. D. Becke, *J. Chem. Phys.*, 1993, **98**, 1372–1377.
14. C. Lee, W. Yang and R. G. Parr, *Phys. Rev. B*, 1988, **37**, 785–789.
15. S. Grimme, J. Antony, S. Ehrlich and H. Krieg, *J. Chem. Phys.*, 2010, **132**, 154104.
